# Supplementary material for: DNA Methylation of miR-7 is a Mechanism Involved in Platinum Response through MAFG Overexpression in Cancer Cells
Source: PubMed Central journal article supplement — Theranostics. 2017 Sep 22;7(17):4118–34. doi: 10.7150/thno.20112 (PMC5695001; doi:10.7150/thno.20112), 2017-09-22
Supplement: thnov07p4118s2.pdf [file thnov07p4118s2.pdf]

|           |              |    |    |    |    |   |   |   |   |   |   |   |   |   |   |
|-----------|--------------|----|----|----|----|---|---|---|---|---|---|---|---|---|---|
| HIPK2     | NM_022740    | 0  | 0  | -1 | 0  | X | X | X | X | X | X | X | X | X |   |
| HMCN1     | NM_031935    | -1 | -1 | -1 | 1  | X | X | X | X | X | X | X | X | X |   |
| IKZF2     | NM_001079526 | 0  | -1 | 1  | 0  | X | X | X | X | X | X | X | X | X |   |
| IL1R1     | NM_000877    | 0  | -1 | 1  | 0  | X | X | X | X | X | X | X | X | X |   |
| ITGAV     | NM_002210    | -1 | 1  | 1  | 0  |   | X | X | X | X | X | X | X | X | X |
| ITSN1     | NM_001001132 | 0  | -1 | 1  | 1  | X | X | X | X | X | X | X | X | X |   |
| KBTBD6    | NM_152903    | 0  | -1 | 0  | 0  | X | X |   | X | X | X | X | X | X | X |
| KIAA1147  | NM_001080392 | -1 | 0  | 0  | -1 | X | X | X | X | X | X | X | X | X |   |
| KIAA1217  | NM_019590    | 1  | -1 | -1 | -1 | X | X | X | X | X | X | X | X | X |   |
| KIAA1217  | NM_019590    | 1  | -1 | -1 | -1 | X | X | X | X | X | X | X | X | X |   |
| KIF1B     | NM_183416    | -1 | 1  | 0  | 0  | X | X | X | X | X | X | X | X | X |   |
| KIRREL    | NM_018240    | 0  | 0  | -1 | -1 | X | X | X | X | X | X | X | X | X |   |
| KIRREL    | AK090554     | 0  | 0  | -1 | 0  | X | X | X | X | X | X | X | X | X |   |
| KLHL24    | NM_017644    | -1 | 0  | 0  | -1 | X | X | X | X | X | X | X | X |   | X |
| LANCL1    | NM_006055    | -1 | -1 | 0  | 0  | X | X | X | X | X | X | X | X |   | X |
| LIMD1     | NM_014240    | 0  | -1 | -1 | 0  | X | X | X | X | X | X | X | X | X |   |
| LPGAT1    | NM_014873    | -1 | -1 | 0  | 1  | X | X | X | X | X | X | X | X |   | X |
| LRP1B     | NM_018557    | 0  | 0  | -1 | 0  | X | X | X | X | X | X | X | X | X |   |
| LRRC8B    | NM_015350    | 1  | -1 | 1  | 0  | X | X | X | X | X | X | X | X | X |   |
| MBP       | NM_001025100 | 1  | -1 | -1 | 0  | X | X | X | X | X | X | X | X | X |   |
| MECP2     | NM_004992    | -1 | 0  | 0  | 0  | X | X | X | X |   | X | X | X | X | X |
| MLLT6     | NM_005937    | -1 | 0  | -1 | 0  | X | X | X | X | X | X | X | X | X |   |
| MME       | NM_007289    | -1 | 1  | 0  | 0  | X | X | X | X | X | X | X | X | X |   |
| MXD1      | NM_002357    | -1 | -1 | 1  | -1 | X | X | X | X | X | X | X | X | X |   |
| NAV3      | NM_014903    | 0  | 0  | -1 | -1 | X | X |   | X | X | X | X | X | X | X |
| NBN       | NM_002485    | -1 | 0  | 0  | 0  | X | X | X | X | X | X | X | X |   | X |
| NHLRC2    | AK126751     | -1 | 0  | -1 | 0  | X | X | X | X | X | X | X | X | X |   |
| NOVA1     | NM_006491    | 0  | 0  | -1 | 1  | X | X | X | X | X | X | X | X | X |   |
| NPAS3     | NM_022123    | 0  | 0  | -1 | -1 | X |   | X | X | X | X | X | X | X | X |
| OSBPL3    | NM_015550    | -1 | -1 | 1  | -1 | X | X | X | X | X | X | X | X |   | X |
| PGPEP1    | NM_017712    | -1 | -1 | 0  | -1 | X | X | X | X | X | X | X | X | X |   |
| PIGK      | NM_005482    | -1 | -1 | 1  | 0  | X | X | X | X | X | X | X | X | X |   |
| POLR1A    | NM_015425    | 0  | -1 | -1 | 1  | X | X | X | X | X | X | X | X | X |   |
| PPARA     | NM_005036    | 0  | -1 | -1 | -1 | X | X | X | X | X | X | X | X | X |   |
| PPP1R16B  | NM_015568    | 0  | -1 | 1  | -1 | X | X | X | X | X | X | X | X | X |   |
| PRDM2     | NM_012231    | -1 | 0  | 0  | -1 | X | X |   | X | X | X | X | X | X | X |
| PRKG1     | NM_006258    | 0  | -1 | 1  | -1 | X | X | X | X | X | X | X | X |   | X |
| PRKG1     | NM_006258    | 0  | -1 | 1  | -1 | X | X | X | X | X | X | X | X |   | X |
| PTCHD1    | BX107899     | 1  | 0  | -1 | -1 | X | X | X | X | X | X | X | X | X |   |
| PTPRG     | BC036018     | -1 | -1 | -1 | 0  | X | X | X | X | X | X | X | X | X |   |
| PTPRG     | NM_002841    | 0  | -1 | -1 | 0  | X | X | X | X | X | X | X | X | X |   |
| QKI       | NM_006775    | -1 | 1  | -1 | -1 | X | X |   | X | X | X | X | X | X | X |
| RAB11FIP2 | NM_014904    | -1 | 0  | 0  | -1 |   | X | X | X | X | X | X | X | X | X |
| RAB6A     | NM_002869    | -1 | 1  | 0  | 0  | X |   | X | X | X | X | X | X | X | X |
| RBM5      | AF107493     | -1 | -1 | -1 | 1  | X |   | X | X | X | X | X | X | X | X |
| RIMS3     | NM_014747    | -1 | 0  | 0  | 0  |   | X | X | X | X | X | X | X | X | X |
| RNF213    | NM_020914    | 0  | -1 | -1 | 1  | X | X | X | X | X | X | X | X | X |   |
| RRP15     | NM_016052    | -1 | -1 | -1 | -1 | X | X | X | X | X | X | X | X | X |   |
| SCYL2     | AB037781     | -1 | -1 | 1  | 0  | X | X | X | X | X | X | X | X |   | X |
| SETDB2    | NM_031915    | -1 | -1 | 1  | 0  | X | X | X | X | X | X | X | X | X |   |
| SH3PXD2A  | NM_014631    | -1 | 0  | 1  | 0  | X | X | X | X | X | X | X | X | X |   |
| SLC44A1   | NM_080546    | 0  | 0  | -1 | 0  | X | X | X | X | X | X | X | X | X |   |
| SLFN5     | NM_144975    | -1 | -1 | -1 | -1 | X | X |   | X | X | X | X | X | X | X |
| SPATA13   | NM_153023    | 0  | -1 | 1  | 1  | X | X | X | X | X | X | X | X | X |   |
| STAMBP    | AK023768     | -1 | 0  | 0  | -1 | X | X | X | X | X | X | X | X | X |   |
| STEAP2    | NM_152999    | -1 | 0  | 0  | -1 | X | X | X | X | X | X | X | X | X |   |
| STRN3     | NM_014574    | -1 | 0  | -1 | 1  | X | X | X |   | X | X | X | X | X | X |
| TAF1      | NM_004606    | 0  | -1 | -1 | 0  | X | X | X | X | X | X | X | X | X |   |
| THAP2     | NM_031435    | -1 | 0  | -1 | -1 | X | X | X | X | X | X | X | X | X |   |
| TM2D2     | NM_031940    | -1 | 1  | 1  | 1  | X |   | X | X | X | X | X | X | X | X |
| VANGL1    | NM_138959    | 0  | 0  | -1 | 0  | X | X | X | X | X | X | X | X | X |   |
| WIPF2     | BC030561     | -1 | 0  | -1 | 0  | X | X | X | X | X | X | X | X | X |   |
| ZBTB38    | NM_001080412 | -1 | 0  | 0  | -1 | X | X | X | X | X | X | X | X |   | X |
| ZDHH2     | NM_016353    | -1 | 0  | -1 | -1 | X | X |   | X | X | X | X | X | X | X |
| ZFH4      | NM_024721    | 0  | -1 | 0  | -1 | X | X |   | X | X | X | X | X | X | X |
| ZFYVE16   | NM_014733    | 0  | -1 | 0  | -1 | X | X | X | X | X | X |   | X | X | X |





|          |              |    |    |    |    |   |   |   |   |   |   |   |   |   |   |
|----------|--------------|----|----|----|----|---|---|---|---|---|---|---|---|---|---|
| RNF141   | NM_016422    | -1 | 0  | 1  | 0  | X | X | X | X | X |   | X | X | X |   |
| RSU1     | NM_012425    | -1 | 0  | 0  | -1 | X | X | X | X | X | X | X | X |   |   |
| SCN2A    | NM_021007    | 0  | -1 | 0  | 1  | X | X | X | X | X | X | X | X |   |   |
| SCN2B    | NM_004588    | -1 | 0  | 0  | 0  | X |   | X | X |   | X | X | X | X | X |
| SETD2    | NM_014159    | 0  | 0  | -1 | 1  | X | X |   | X | X | X | X | X | X |   |
| SH2B3    | NM_005475    | 0  | 0  | -1 | -1 | X | X | X |   | X | X | X | X | X |   |
| SH3D19   | NM_001009555 | -1 | -1 | 0  | 0  | X | X |   | X | X | X | X | X | X |   |
| SLC22A15 | NM_018420    | -1 | -1 | 1  | 0  | X | X | X | X | X | X | X | X |   |   |
| SLC7A11  | NM_014331    | -1 | 1  | 0  | -1 |   | X |   | X | X | X | X | X | X | X |
| SLC7A11  | NM_014331    | -1 | 1  | 0  | -1 |   | X |   | X | X | X | X | X | X | X |
| SMARCC1  | NM_003074    | 0  | 0  | -1 | 0  | X | X |   | X | X | X | X | X | X |   |
| SMURF2   | AK002019     | -1 | 0  | 0  | -1 | X |   | X |   | X | X | X | X | X | X |
| SNX9     | NM_016224    | 0  | 0  | -1 | 1  | X | X | X | X | X | X |   |   | X | X |
| SOBP     | NM_018013    | 0  | -1 | 1  | 0  |   | X | X | X | X | X | X | X | X |   |
| SPRY1    | NM_199327    | 1  | 1  | -1 | -1 | X | X | X | X | X |   | X | X |   | X |
| SPRY3    | NM_005840    | -1 | -1 | 1  | 0  | X | X | X | X | X | X | X | X |   |   |
| STK17B   | NM_004226    | 0  | -1 | 1  | 1  | X | X |   | X | X | X | X | X | X |   |
| STK38    | NM_007271    | -1 | 0  | 1  | 0  | X |   | X | X | X | X | X | X | X |   |
| STK39    | NM_013233    | 0  | -1 | 0  | -1 | X | X |   | X | X | X | X | X | X |   |
| STXBP4   | NM_178509    | -1 | 0  | 1  | 0  | X | X |   | X | X |   | X | X | X | X |
| SYNE1    | NM_033071    | -1 | 0  | 1  | 0  | X | X |   | X | X | X | X | X | X |   |
| SYNE1    | NM_182961    | -1 | -1 | 0  | 0  | X | X |   | X | X | X | X | X | X |   |
| SYTL2    | NM_206927    | 0  | -1 | 1  | 1  | X | X |   | X | X | X | X | X | X |   |
| TANC2    | AB046856     | -1 | 0  | 0  | 1  | X |   | X | X | X | X | X | X | X |   |
| TBC1D1   | NM_015173    | 0  | -1 | -1 | -1 | X | X | X | X |   | X |   | X | X | X |
| TBC1D8B  | NM_017752    | 0  | -1 | 1  | -1 | X |   | X | X | X | X | X | X | X |   |
| TBRG1    | NM_032811    | -1 | 1  | 1  | -1 | X | X | X | X | X | X | X | X |   |   |
| TMTC1    | NM_175861    | 1  | -1 | 1  | -1 | X |   | X | X | X | X | X | X | X |   |
| TMTC2    | NM_152588    | 1  | 0  | -1 | 0  |   | X | X | X | X |   | X | X | X | X |
| TNKS     | NM_003747    | -1 | 0  | -1 | 0  | X | X |   | X | X | X | X | X | X |   |
| TPBG     | NM_006670    | 1  | 0  | 0  | -1 |   | X | X | X | X | X | X | X | X |   |
| TRAK2    | NM_015049    | -1 | -1 | 1  | 0  |   | X | X | X | X | X | X | X | X |   |
| TRAK2    | NM_015049    | -1 | -1 | 1  | 0  |   | X | X | X | X | X | X | X | X |   |
| TRIM14   | NM_014788    | 0  | 0  | -1 | 0  | X |   | X |   | X | X | X | X | X | X |
| TRIM2    | NM_015271    | -1 | -1 | 0  | 0  | X | X | X | X | X | X | X | X |   |   |
| TRPS1    | NM_014112    | 0  | -1 | 0  | -1 | X | X |   | X | X | X | X | X |   | X |
| TSPAN18  | NM_130783    | 0  | 0  | -1 | 0  | X | X |   | X | X | X | X | X | X |   |
| TTC28    | AK092338     | -1 | 0  | -1 | 0  |   |   | X | X | X | X | X | X | X | X |
| TWISTNB  | NM_001002926 | -1 | 0  | 1  | -1 | X | X | X | X | X | X | X | X |   |   |
| UBTF     | NM_014233    | 1  | 1  | -1 | 1  | X |   | X | X | X | X | X | X | X |   |
| UNC5B    | NM_170744    | -1 | 1  | 1  | -1 | X |   | X | X | X | X | X | X | X |   |
| VEZF1    | NM_007146    | -1 | 0  | 0  | 0  | X |   |   | X | X | X | X | X | X | X |
| VPS13D   | NM_015378    | -1 | -1 | -1 | 0  | X | X | X | X | X | X | X | X |   |   |
| VPS13D   | AK001481     | -1 | -1 | 0  | 0  | X | X | X | X | X | X | X | X |   |   |
| WDR78    | NM_207014    | -1 | -1 | 0  | 1  |   | X | X | X | X | X | X | X | X |   |
| WDR78    | NM_024763    | -1 | -1 | 0  | 0  |   | X | X | X | X | X | X | X | X |   |
| WHSC1L1  | NM_017778    | -1 | 0  | 0  | 0  | X | X | X |   | X | X | X | X |   | X |
| WIPF1    | NM_003387    | -1 | 1  | 0  | 0  | X | X | X | X | X | X | X | X |   |   |
| WIPF1    | NM_003387    | -1 | 1  | 0  | 0  | X | X | X | X | X | X | X | X |   |   |
| ZC3H6    | NM_198581    | -1 | 0  | 0  | 0  | X | X |   | X | X | X | X | X | X |   |
| ZHX1     | NM_001017926 | -1 | -1 | 1  | 0  | X | X |   | X | X | X | X | X | X |   |
| ZNF185   | AK095258     | -1 | -1 | -1 | 0  | X | X | X | X | X | X |   | X |   | X |
| ZNF284   | CR936662     | -1 | 0  | 0  | -1 | X | X | X |   | X | X | X | X | X |   |
| ZNF449   | NM_152695    | -1 | 0  | 0  | -1 | X |   | X | X | X | X | X | X | X |   |
| ZNF471   | NM_020813    | -1 | 0  | 0  | 0  | X | X | X | X | X | X | X | X |   |   |
| ZNF471   | AB037817     | -1 | 0  | 0  | 0  | X | X | X | X | X | X | X | X |   |   |
| ZNF655   | NM_001009957 | 1  | 1  | -1 | 0  | X | X |   | X | X | X | X | X | X |   |
| ZNRF2    | NM_147128    | 1  | -1 | -1 | 1  |   | X | X | X | X | X | X | X | X |   |
| ZSCAN12  | NM_001039643 | -1 | 0  | 0  | 0  | X | X | X |   | X | X | X | X | X |   |
| AAK1     | NM_014911    | -1 | -1 | 0  | -1 | X |   |   | X | X |   | X | X | X | X |
| ABCB8    | NM_007188    | 1  | -1 | -1 | 0  | X |   | X | X |   | X | X | X | X |   |
| ABLIM1   | NM_001003408 | -1 | 1  | -1 | -1 |   | X | X | X | X | X | X | X |   |   |
| ACTR8    | NM_022899    | 0  | 0  | -1 | -1 | X | X |   | X | X |   | X | X |   | X |
| ADAM9    | NM_001005845 | -1 | 1  | 0  | 1  |   | X | X | X | X | X | X | X |   |   |
| ADAM9    | NM_003816    | -1 | 0  | 0  | 0  |   | X | X | X | X | X | X | X |   |   |
| ADAMTS9  | NM_182920    | 0  | -1 | -1 | -1 | X | X |   | X | X | X |   | X | X |   |

|           |              |    |    |    |    |   |   |   |   |   |   |   |   |   |   |
|-----------|--------------|----|----|----|----|---|---|---|---|---|---|---|---|---|---|
| AGPAT3    | NM_020132    | 1  | -1 | -1 | -1 | X | X |   | X |   | X | X | X | X |   |
| ALG9      | NM_001077691 | -1 | 0  | -1 | 1  | X |   | X | X | X | X |   |   | X | X |
| ALG9      | NM_024740    | -1 | 0  | -1 | 0  | X |   | X | X | X | X |   |   | X | X |
| AMOTL1    | NM_130847    | 0  | 0  | -1 | 0  | X |   | X | X | X | X | X |   | X |   |
| ANGEL2    | NM_144567    | -1 | -1 | 0  | -1 |   | X |   | X | X | X | X | X | X |   |
| ANGPTL1   | NM_004673    | -1 | 0  | 0  | -1 | X |   | X |   | X | X | X | X | X |   |
| ANK2      | NM_001148    | -1 | 0  | 0  | 0  | X |   | X | X | X | X | X |   | X |   |
| ANKRD10   | NM_017664    | -1 | 0  | 0  | 0  |   | X | X | X | X | X | X | X | X |   |
| ANXA4     | NM_001153    | -1 | -1 | -1 | 0  | X | X |   | X | X | X | X | X | X |   |
| APOL6     | NM_030641    | 0  | -1 | -1 | -1 | X |   | X | X | X | X | X |   | X |   |
| ARHGEF17  | NM_014786    | 0  | 0  | -1 | 1  | X |   |   | X | X | X | X | X | X | X |
| ARSD      | NM_009589    | -1 | -1 | 0  | 1  | X |   | X | X | X | X | X |   | X |   |
| ATG7      | NM_006395    | -1 | -1 | -1 | 0  | X |   | X | X | X | X | X | X |   |   |
| ATG7      | AL122075     | -1 | 0  | -1 | -1 | X |   | X | X | X | X | X | X |   |   |
| ATP11C    | NM_173694    | -1 | 0  | 0  | 0  | X |   | X | X | X | X | X |   | X |   |
| ATP1A2    | NM_000702    | -1 | 1  | 0  | -1 |   |   | X | X | X | X | X | X | X |   |
| BCL11A    | NM_138553    | 1  | 0  | -1 | 0  | X |   |   | X | X | X | X |   | X | X |
| BCL2L2    | NM_004050    | -1 | 0  | -1 | -1 |   | X |   | X | X | X | X | X | X |   |
| BID       | NM_197966    | 0  | -1 | -1 | 0  | X | X | X |   | X | X | X | X |   |   |
| C20orf194 | BC106086     | -1 | -1 | -1 | 0  | X |   |   | X | X | X | X | X | X |   |
| C8orf31   | NM_173687    | -1 | -1 | 0  | 1  | X | X | X |   | X | X | X | X | X |   |
| C8orf37   | NM_177965    | -1 | 0  | 0  | 0  |   |   |   | X | X | X | X | X | X | X |
| CAMK1D    | NM_153498    | 1  | -1 | 0  | -1 | X | X |   | X | X |   | X | X | X |   |
| CANX      | NM_001746    | -1 | 0  | 1  | 0  | X |   | X | X | X | X | X |   |   | X |
| CASP10    | NM_032977    | -1 | -1 | 1  | -1 | X |   |   | X | X | X | X | X | X |   |
| CASP10    | NM_032974    | -1 | 0  | 0  | -1 | X |   |   | X | X | X | X | X | X |   |
| CCT5      | NM_012073    | 0  | -1 | -1 | 0  | X | X | X |   | X | X | X | X |   |   |
| CD302     | NM_014880    | -1 | 0  | 1  | 0  |   |   | X | X | X | X | X |   | X | X |
| CLCN3     | NM_173872    | -1 | -1 | 1  | -1 | X | X |   |   | X | X | X | X |   | X |
| CLCN3     | NM_001829    | -1 | -1 | 1  | -1 | X | X |   |   | X | X | X | X |   | X |
| CLIP4     | NM_024692    | -1 | 1  | 0  | -1 |   |   | X | X | X | X |   | X | X | X |
| CLYBL     | NM_206808    | -1 | 0  | -1 | -1 |   | X |   | X | X | X | X | X | X |   |
| CTAGE5    | NM_203356    | -1 | -1 | 1  | -1 | X | X |   | X | X | X | X | X |   |   |
| CTNNB1    | NM_001904    | 0  | 0  | -1 | 0  | X | X |   | X |   | X | X | X | X |   |
| DAB2IP    | NM_032552    | 0  | 1  | -1 | -1 | X | X | X |   | X |   | X | X | X |   |
| DNAJC10   | NM_018981    | -1 | 0  | 1  | 0  | X | X | X |   | X | X | X | X |   |   |
| EDA       | NM_001399    | 1  | -1 | 0  | 0  | X | X | X | X | X |   |   | X | X |   |
| EDA       | NM_001005614 | 0  | -1 | 0  | 0  | X | X | X | X | X |   |   | X | X |   |
| EFCAB2    | NM_032328    | -1 | -1 | 0  | -1 |   | X |   | X | X | X |   | X | X | X |
| ELAVL1    | NM_001419    | 0  | 0  | -1 | 0  | X |   | X | X | X | X | X |   |   | X |
| ELMOD2    | NM_153702    | -1 | 1  | 1  | -1 |   | X |   | X | X | X | X | X |   | X |
| ENPEP     | NM_001977    | 0  | -1 | -1 | 0  | X | X |   |   | X | X | X | X |   | X |
| EPB41     | NM_004437    | -1 | 0  | 1  | 0  |   | X |   | X | X | X | X | X | X |   |
| ERC2      | NM_015576    | 1  | -1 | 1  | -1 | X |   |   | X | X | X | X | X | X |   |
| ERRFI1    | NM_018948    | 1  | 1  | -1 | 0  | X | X | X |   | X | X | X | X |   |   |
| EXT1      | NM_000127    | 1  | -1 | 1  | 1  | X |   | X |   | X | X | X | X | X |   |
| FAS       | NM_000043    | 1  | 0  | -1 | 1  |   |   | X | X | X | X |   | X | X | X |
| FIX1      | NM_014344    | 1  | 0  | -1 | 1  |   |   | X | X | X |   |   | X | X | X |
| FSTL1     | NM_007085    | -1 | 0  | 0  | 1  | X |   | X | X | X | X | X |   | X |   |
| GBP3      | NM_018284    | 1  | -1 | -1 | -1 |   |   | X | X | X | X | X | X | X |   |
| GFPT1     | NM_002056    | -1 | 0  | 1  | -1 |   | X |   | X | X | X | X | X | X |   |
| GLS       | NM_014905    | -1 | -1 | 0  | 0  |   | X | X | X | X | X | X | X | X |   |
| GNB5      | NM_016194    | -1 | 0  | -1 | -1 | X |   | X | X | X | X | X |   | X |   |
| GOLGA1    | NM_002077    | -1 | 0  | -1 | -1 | X |   | X | X | X | X | X |   | X |   |
| GOLPH3L   | NM_018178    | -1 | 0  | 0  | 0  |   |   | X | X | X | X | X | X | X |   |
| GPATCH8   | NM_001002909 | -1 | 0  | 0  | 0  |   |   | X | X | X | X | X | X | X |   |
| H6PD      | NM_004285    | -1 | 0  | -1 | 0  | X | X | X |   |   | X | X | X | X |   |
| IFT57     | NM_018010    | 1  | -1 | 1  | -1 | X |   | X | X | X | X | X | X |   |   |
| IQCH      | NM_022784    | -1 | 0  | 1  | -1 | X | X | X | X |   | X |   | X | X |   |
| IQGAP1    | NM_003870    | -1 | 0  | 0  | 0  | X | X | X |   | X | X |   | X |   | X |
| ITGB5     | NM_002213    | 0  | 1  | -1 | 1  |   |   | X | X | X | X |   | X | X | X |
| ITPKB     | NM_002221    | -1 | 0  | 0  | -1 | X | X | X |   | X |   | X | X | X |   |
| IVD       | NM_002225    | -1 | -1 | -1 | 0  | X | X | X | X | X |   |   | X | X |   |
| IVNS1ABP  | NM_016389    | 0  | -1 | -1 | 0  | X | X |   | X | X | X | X | X |   |   |
| JAK2      | NM_004972    | -1 | 0  | 1  | 0  |   |   | X | X | X | X | X |   | X | X |
| KCNV1     | NM_014379    | 0  | 0  | 1  | -1 | X | X |   |   | X | X | X | X | X |   |

|          |              |    |    |    |    |   |   |   |   |   |   |   |   |   |   |
|----------|--------------|----|----|----|----|---|---|---|---|---|---|---|---|---|---|
| KIAA0754 | AB018297     | -1 | -1 | -1 | -1 | X |   |   | X | X | X | X | X |   | X |
| KIF5A    | AB210045     | -1 | -1 | 0  | 1  | X | X | X |   | X |   | X | X | X |   |
| KLHDC1   | NM_172193    | -1 | 0  | -1 | -1 | X | X |   | X | X | X | X | X |   |   |
| LARS2    | NM_015340    | 0  | 0  | -1 | 0  | X | X |   | X | X |   | X | X | X |   |
| LCP1     | NM_002298    | 0  | -1 | 1  | -1 | X |   |   | X | X | X | X | X | X |   |
| LMBRD2   | NM_001007527 | -1 | 0  | 0  | -1 | X | X |   | X | X | X | X | X |   |   |
| LMLN     | NM_033029    | -1 | 0  | 1  | 0  | X | X |   | X | X | X | X | X |   |   |
| LMLN     | AL832783     | -1 | 0  | 1  | -1 | X | X |   | X | X | X | X | X |   |   |
| LTBP2    | NM_000428    | 1  | 0  | -1 | 1  |   | X |   | X | X | X | X | X | X |   |
| LYRM7    | NM_181705    | -1 | -1 | 1  | -1 |   | X |   | X | X | X | X | X | X |   |
| MAGI1    | NM_004742    | 0  | -1 | 0  | 0  |   | X |   |   | X | X | X | X | X | X |
| MAP3K8   | NM_005204    | 1  | 1  | -1 | 0  | X | X |   | X | X | X | X | X |   |   |
| MAPK6    | NM_002748    | -1 | 1  | 0  | 0  | X | X |   | X | X |   |   | X | X | X |
| MBNL1    | NM_207296    | -1 | 0  | -1 | 0  |   | X |   | X | X | X | X | X | X |   |
| ME1      | NM_002395    | -1 | -1 | 0  | 0  | X |   | X | X |   | X | X |   | X | X |
| MOSPD1   | NM_019556    | -1 | 1  | 1  | -1 | X | X | X |   | X | X | X | X |   |   |
| MRAS     | NM_012219    | -1 | -1 | -1 | -1 |   | X | X | X |   | X | X | X |   | X |
| MRE11A   | NM_005590    | 0  | -1 | 1  | 0  |   | X |   | X | X | X | X | X |   | X |
| MRE11A   | NM_005590    | 0  | -1 | 1  | 0  |   | X |   | X | X | X | X | X |   | X |
| MUM1L1   | NM_152423    | -1 | -1 | 1  | 0  |   | X |   | X | X | X | X | X |   | X |
| MYH9     | NM_002473    | -1 | 0  | -1 | 0  | X |   |   | X |   | X | X | X | X | X |
| NEK1     | NM_012224    | -1 | 0  | 1  | 0  | X |   |   | X | X | X | X |   | X | X |
| NFIC     | NM_005597    | 0  | 0  | -1 | 0  | X |   | X | X | X | X |   | X | X |   |
| NFIX     | NM_002501    | -1 | -1 | -1 | -1 | X | X |   | X | X |   | X | X | X |   |
| NKTR     | NM_001012651 | -1 | -1 | 0  | 1  |   | X | X | X | X | X | X | X |   |   |
| NMNAT1   | NM_022787    | -1 | 0  | -1 | -1 | X | X |   | X | X | X | X | X |   |   |
| NOTCH1   | NM_017617    | 1  | 0  | -1 | 0  | X | X |   |   | X |   | X | X | X | X |
| NR5A2    | NM_205860    | 1  | -1 | -1 | 0  | X |   |   | X | X | X | X | X | X |   |
| NRG4     | NM_138573    | -1 | -1 | 1  | -1 | X | X |   |   | X |   | X | X | X | X |
| NRN1     | NM_016588    | 1  | -1 | 0  | 0  | X | X | X |   | X | X |   | X | X |   |
| NUDT4    | NM_199040    | -1 | -1 | 1  | -1 | X | X |   | X | X | X | X | X |   |   |
| OAS3     | NM_006187    | 0  | 0  | -1 | 0  | X | X |   |   | X |   | X | X | X | X |
| OXR1     | NM_181354    | -1 | 0  | 1  | 0  |   | X | X | X | X | X | X | X |   |   |
| OXR1     | NM_181354    | -1 | 0  | 1  | 0  |   | X | X | X | X | X | X | X |   |   |
| PACRG    | NM_152410    | -1 | -1 | 0  | -1 | X | X | X |   | X |   |   | X | X | X |
| PAK2     | NM_002577    | 0  | 0  | -1 | 1  | X |   | X | X | X | X | X |   | X |   |
| PARP14   | NM_017554    | 0  | 0  | -1 | -1 | X | X | X |   | X | X | X | X |   |   |
| PCTP     | NM_021213    | -1 | 0  | 0  | 1  | X | X | X |   | X | X |   | X | X |   |
| PDE4A    | NM_006202    | 0  | 1  | -1 | 1  | X | X | X | X | X |   |   |   | X | X |
| PDE4A    | NM_006202    | 0  | 1  | -1 | 1  | X | X | X | X | X |   |   |   | X | X |
| PDE6A    | NM_000440    | -1 | 1  | -1 | 1  |   | X |   | X | X | X | X | X |   | X |
| PDSS2    | NM_020381    | -1 | -1 | 0  | 0  | X |   | X | X | X | X |   |   | X | X |
| PFKL     | NM_001002021 | 0  | 0  | -1 | 0  |   | X | X | X |   | X | X | X | X |   |
| PHKA1    | NM_002637    | 0  | -1 | -1 | -1 | X | X |   | X | X | X | X | X |   |   |
| PIGP     | NM_153682    | -1 | 0  | 0  | 0  | X | X | X | X |   | X | X | X |   |   |
| PIM1     | NM_002648    | 1  | 1  | -1 | 0  | X | X | X |   | X |   | X | X | X |   |
| POM121   | AB014518     | 0  | 0  | -1 | -1 |   | X | X | X |   | X | X | X | X |   |
| PPFIBP1  | NM_177444    | -1 | 1  | 0  | -1 |   | X |   | X | X | X | X | X |   | X |
| PPP1CB   | NM_002709    | -1 | 0  | 0  | -1 |   | X |   | X | X | X | X | X |   | X |
| PRDM15   | BC067102     | 1  | -1 | 0  | 1  | X | X | X |   |   | X | X | X | X |   |
| PRKCE    | NM_005400    | -1 | -1 | 0  | -1 |   | X |   | X | X | X | X | X | X |   |
| PTPDC1   | NM_177995    | -1 | 0  | 0  | 0  | X | X | X | X | X | X | X | X |   |   |
| RAB15    | NM_198686    | -1 | -1 | 0  | 1  | X | X | X | X |   |   | X | X | X |   |
| RAB3D    | NM_004283    | 0  | -1 | -1 | 0  | X |   | X | X | X | X | X | X |   |   |
| RAB4A    | NM_004578    | -1 | -1 | 1  | -1 | X |   | X | X | X | X | X |   |   | X |
| RAB6B    | NM_016577    | 1  | 0  | -1 | -1 | X | X | X | X | X | X |   | X |   |   |
| RAB8B    | NM_016530    | -1 | 0  | 1  | 0  | X | X |   | X | X |   | X | X | X |   |
| RABEP1   | NM_004703    | 0  | -1 | 1  | 0  | X |   | X | X | X | X |   |   | X | X |
| RAD23B   | NM_002874    | 0  | 0  | -1 | -1 | X | X |   | X | X | X | X | X |   |   |
| RAP2C    | NM_021183    | -1 | -1 | 0  | -1 | X |   |   | X | X | X | X | X | X |   |
| RAPGEF3  | NM_006105    | 0  | 0  | -1 | -1 | X |   | X | X |   | X | X | X | X |   |
| RASSF2   | NM_014737    | 0  | -1 | 1  | -1 | X |   | X |   |   | X | X | X | X | X |
| RAVER2   | NM_018211    | -1 | -1 | 0  | 0  | X | X |   | X | X |   | X | X | X |   |
| RBMS3    | NM_014483    | -1 | -1 | 0  | 0  | X |   | X | X | X | X | X | X |   |   |
| RBMS3    | NM_001003793 | -1 | -1 | 0  | 0  | X |   | X | X | X | X | X | X |   |   |
| RFFL     | NM_057178    | -1 | 0  | -1 | 0  | X |   | X | X | X | X | X |   | X |   |

|          |              |    |    |    |    |   |   |   |   |   |   |   |   |   |   |
|----------|--------------|----|----|----|----|---|---|---|---|---|---|---|---|---|---|
| RGL1     | NM_015149    | 1  | 1  | 0  | -1 |   |   | X | X | X | X | X |   | X | X |
| RHOQ     | NM_012249    | -1 | 1  | 1  | -1 | X | X | X |   | X | X | X | X |   |   |
| RNF180   | NM_178532    | 0  | -1 | 1  | -1 | X |   |   | X | X | X | X |   | X | X |
| RPS6KA4  | NM_003942    | -1 | -1 | -1 | 0  | X |   | X | X |   | X | X | X | X |   |
| RRAGD    | NM_021244    | 1  | -1 | 1  | -1 | X | X |   | X | X | X | X | X |   |   |
| RUNX1    | NM_001001890 | 1  | -1 | -1 | -1 |   |   | X | X | X | X | X | X | X |   |
| SEMA3A   | NM_006080    | 0  | -1 | 0  | 1  |   | X |   | X | X | X | X | X | X |   |
| SERP1    | NM_014445    | -1 | 0  | 0  | 0  | X | X | X | X | X | X |   | X |   |   |
| SGPL1    | NM_003901    | -1 | -1 | -1 | -1 | X |   | X | X | X | X |   | X | X |   |
| SH3KBP1  | NM_031892    | -1 | 1  | -1 | 0  | X | X | X |   | X | X |   | X | X |   |
| SH3TC2   | NM_024577    | 0  | 0  | -1 | 0  | X |   | X | X |   | X | X | X | X |   |
| SIX4     | NM_017420    | 0  | 0  | -1 | 0  | X | X |   | X | X | X | X | X |   |   |
| SIX4     | NM_017420    | 0  | 0  | -1 | 0  | X | X |   | X | X | X | X | X |   |   |
| SLC10A7  | AK075364     | -1 | 0  | 1  | 0  | X | X | X |   | X | X |   | X | X |   |
| SLC1A1   | NM_004170    | 1  | -1 | 0  | 0  |   | X | X | X |   | X | X | X | X |   |
| SLC25A37 | NM_016612    | 1  | 0  | -1 | -1 | X |   | X | X | X | X | X |   | X |   |
| SLC25A37 | AF495725     | 0  | -1 | -1 | -1 | X |   | X | X | X | X | X |   | X |   |
| SLC25A37 | AK093931     | 0  | -1 | -1 | -1 | X |   | X | X | X | X | X |   | X |   |
| SLC25A37 | AY032628     | 0  | 0  | -1 | -1 | X |   | X | X | X | X | X |   | X |   |
| SLC39A14 | NM_015359    | -1 | -1 | -1 | 0  | X | X | X |   | X | X |   |   | X | X |
| SMEK2    | NM_020463    | -1 | -1 | 0  | 0  | X |   | X | X | X |   | X |   | X | X |
| SMURF1   | NM_020429    | 1  | 0  | -1 | 0  |   | X | X | X | X | X |   | X | X |   |
| SORL1    | NM_003105    | 1  | -1 | -1 | 0  | X |   | X | X | X | X | X |   | X |   |
| SPATA17  | NM_138796    | -1 | 0  | 0  | -1 | X | X | X |   | X | X | X | X |   |   |
| SPG20    | NM_015087    | -1 | 0  | 0  | 0  | X |   |   | X | X | X | X | X |   | X |
| SPOCK2   | NM_014767    | 0  | 0  | -1 | 0  | X | X | X |   | X | X | X |   | X |   |
| STAG2    | NM_006603    | -1 | 0  | 0  | 0  | X | X |   |   | X | X | X | X | X |   |
| STX6     | AK056657     | -1 | 0  | 0  | 0  |   | X | X | X | X | X | X | X |   |   |
| STYX     | NM_145251    | -1 | -1 | 0  | 1  | X |   | X | X | X | X | X |   | X |   |
| SYNPO    | AL831818     | 0  | 0  | -1 | 0  | X |   | X | X | X | X | X | X |   |   |
| TAF9B    | NM_015975    | -1 | 0  | 0  | 1  | X | X | X | X |   | X | X | X |   |   |
| TAOK3    | NM_016281    | -1 | -1 | 1  | -1 | X | X |   | X | X | X | X | X |   |   |
| TAOK3    | NM_016281    | -1 | -1 | 1  | -1 | X | X |   | X | X | X | X | X |   |   |
| TAPT1    | NM_153365    | -1 | 0  | 1  | 0  |   | X | X | X | X | X | X | X |   |   |
| TCEA1    | NM_006756    | -1 | 0  | 0  | -1 | X | X |   | X | X | X |   | X |   | X |
| TFDP1    | NM_007111    | 0  | -1 | -1 | 0  |   | X | X | X | X |   | X | X |   | X |
| TIGD6    | NM_030953    | -1 | 0  | 0  | -1 |   | X | X | X | X | X | X | X |   |   |
| TK2      | NM_004614    | -1 | 0  | -1 | 0  | X | X | X | X | X |   |   | X | X |   |
| TMCC3    | NM_020698    | 1  | -1 | 1  | 0  | X |   |   | X | X | X | X | X | X |   |
| TMEM168  | NM_022484    | -1 | -1 | 0  | -1 | X |   | X | X | X | X | X |   | X |   |
| TMEM64   | NM_001008495 | -1 | -1 | -1 | 0  | X | X |   | X | X | X | X | X |   |   |
| TMPRSS4  | NM_019894    | 0  | -1 | 0  | 0  |   | X |   |   | X | X | X | X | X | X |
| TNFSF4   | NM_003326    | -1 | 0  | -1 | 0  | X | X | X | X | X | X |   | X |   |   |
| TNS3     | NM_022748    | -1 | -1 | -1 | 0  | X | X | X | X |   | X | X |   | X |   |
| TTC3     | NM_003316    | -1 | -1 | 1  | 0  | X |   |   |   | X | X | X | X | X | X |
| TYW3     | NM_138467    | 0  | -1 | 0  | 0  |   |   | X | X | X | X | X | X |   | X |
| UBE2Z    | NM_023079    | -1 | 0  | -1 | 0  |   | X | X |   | X | X | X | X | X |   |
| UBLCP1   | NM_145049    | -1 | -1 | 1  | 1  |   | X | X |   | X | X | X | X | X |   |
| UBOX5    | NM_014948    | 0  | 0  | -1 | -1 | X | X |   | X | X | X |   | X | X |   |
| USP6NL   | NM_001080491 | 0  | 0  | -1 | 0  | X | X |   | X | X | X | X | X |   |   |
| VAMP3    | NM_004781    | 0  | -1 | 0  | 1  | X | X | X |   | X | X | X | X |   |   |
| VGLL4    | NM_014667    | -1 | 0  | -1 | -1 | X | X | X |   | X | X | X | X |   |   |
| VTI1A    | NM_145206    | -1 | 0  | 0  | 0  |   | X | X |   | X | X | X | X | X |   |
| WASF2    | NM_006990    | 0  | 0  | -1 | -1 | X |   | X | X | X | X | X | X |   |   |
| WDR36    | NM_139281    | 0  | -1 | 0  | -1 | X |   | X | X | X | X | X |   |   | X |
| WHSC1    | NM_007331    | 1  | 0  | -1 | 0  |   | X | X |   | X | X | X | X | X |   |
| WHSC1    | NM_133334    | -1 | 0  | -1 | 0  |   | X | X |   | X | X | X | X | X |   |
| XKR6     | NM_173683    | 0  | -1 | 0  | -1 | X | X | X | X | X |   |   | X |   | X |
| ZBED3    | NM_032367    | -1 | 0  | 0  | -1 | X |   | X |   | X | X | X | X | X |   |
| ZBTB7A   | AL390151     | -1 | 0  | -1 | -1 | X | X |   | X | X |   | X | X | X |   |
| ZFHX2    | AB051549     | 1  | 0  | -1 | -1 | X |   | X |   | X | X | X | X | X |   |
| ZFP90    | NM_133458    | -1 | 1  | 1  | 0  | X |   |   | X | X | X |   | X | X | X |
| ZFP90    | NM_133458    | -1 | 1  | 1  | 0  | X |   |   | X | X | X |   | X | X | X |
| ZMYND11  | NM_212479    | 0  | 0  | -1 | 0  |   | X |   | X | X | X | X | X | X |   |
| ZMYND8   | AL137703     | -1 | -1 | -1 | 1  | X | X | X | X | X |   |   | X | X |   |
| ZNF25    | NM_145011    | -1 | -1 | 0  | -1 | X | X |   | X | X | X |   | X | X |   |



|          |           |    |    |    |    |   |   |   |   |   |   |   |   |   |   |
|----------|-----------|----|----|----|----|---|---|---|---|---|---|---|---|---|---|
| ABCB10   | NM_012089 | 0  | -1 | 0  | 0  |   | X |   | X | X | X | X | X |   |   |
| ABCC5    | NM_005688 | -1 | 1  | -1 | 0  | X |   | X | X | X | X | X |   |   |   |
| ABHD12   | NM_015600 | 1  | -1 | 0  | 1  | X | X | X |   | X | X | X |   |   |   |
| ABLIM3   | NM_014945 | 1  | -1 | 1  | -1 | X |   | X |   | X | X | X |   | X |   |
| ACACB    | NM_001093 | -1 | -1 | 1  | 1  |   |   | X |   | X | X |   | X | X | X |
| ADD3     | NM_016824 | -1 | 0  | 1  | 0  | X |   |   | X | X | X | X |   | X |   |
| AK2      | NM_013411 | 0  | -1 | -1 | -1 | X | X |   |   | X | X | X | X |   |   |
| AKAP7    | NM_016377 | -1 | -1 | 0  | 0  |   |   |   | X | X | X | X |   | X | X |
| ALDH1L2  | CR749561  | -1 | 0  | 1  | 0  | X |   | X | X | X | X | X |   |   |   |
| ALPK1    | NM_025144 | -1 | 0  | -1 | -1 | X |   |   | X | X | X | X |   |   | X |
| ALS2CL   | NM_147129 | 0  | -1 | 0  | -1 | X | X | X |   |   | X | X | X |   |   |
| ANGEL1   | NM_015305 | 0  | 0  | -1 | 1  | X | X | X | X | X | X |   |   |   |   |
| ANK3     | AK126851  | -1 | -1 | -1 | 1  |   |   |   | X | X | X | X | X | X |   |
| ANK3     | NM_020987 | -1 | 0  | 1  | 1  |   |   |   | X | X | X | X | X | X |   |
| ANKRD13A | NM_033121 | -1 | 0  | 0  | 1  | X | X |   | X |   | X | X | X |   |   |
| ANTXR1   | NM_032208 | -1 | 0  | -1 | 0  | X |   | X |   | X | X | X |   | X |   |
| ANXA11   | NM_145869 | 0  | -1 | -1 | 0  | X |   | X | X | X |   |   | X | X |   |
| AOC3     | NM_003734 | -1 | 1  | -1 | 0  | X |   | X |   | X |   | X | X | X |   |
| AP2B1    | NM_001282 | -1 | -1 | -1 | -1 | X | X | X |   | X |   | X | X |   |   |
| AP3S2    | NM_005829 | -1 | -1 | -1 | 1  | X | X | X | X | X |   |   | X |   |   |
| APBA2    | NM_005503 | 0  | -1 | -1 | -1 | X | X |   |   | X | X |   | X | X |   |
| APOBEC3F | NM_145298 | 0  | 0  | -1 | 0  |   | X |   |   | X | X | X |   | X | X |
| APBP2    | NM_006380 | -1 | 0  | 0  | 0  |   |   | X | X | X | X | X |   | X |   |
| ARHGEF6  | NM_004840 | 0  | -1 | 1  | 0  | X |   | X |   | X | X | X | X |   |   |
| ARHGEF9  | NM_015185 | 0  | 0  | -1 | 0  | X | X | X |   | X |   | X | X |   |   |
| ARL13B   | NM_182896 | -1 | 1  | 1  | 0  | X |   | X | X | X | X | X |   |   |   |
| ARL13B   | NM_182896 | -1 | 1  | 1  | 0  | X |   | X | X | X | X | X |   |   |   |
| ARL8B    | NM_018184 | -1 | 0  | 0  | -1 | X |   | X |   | X | X | X |   | X |   |
| ARSG     | NM_014960 | -1 | 0  | -1 | 1  | X | X | X |   | X | X | X |   |   |   |
| ARSG     | AB023218  | -1 | -1 | 0  | 1  | X | X | X |   | X | X | X |   |   |   |
| ATP11A   | NM_032189 | 1  | -1 | -1 | 1  | X |   |   | X | X | X | X |   | X |   |
| ATP11A   | NM_015205 | 0  | -1 | 0  | 1  | X |   |   | X | X | X | X |   | X |   |
| AVIL     | NM_006576 | -1 | -1 | 0  | 0  |   | X | X | X | X | X |   | X |   |   |
| AVIL     | BX647344  | -1 | -1 | 0  | 0  |   | X | X | X | X | X |   | X |   |   |
| AZI2     | NM_022461 | -1 | 0  | 1  | 0  | X | X | X |   | X | X |   |   |   | X |
| BCL2L13  | NM_015367 | 0  | -1 | -1 | 0  | X | X |   | X |   | X | X | X |   |   |
| BCR      | NM_021574 | 1  | -1 | 0  | 1  |   | X | X | X |   |   | X | X | X |   |
| BCR      | NM_004327 | 0  | -1 | -1 | 0  |   | X | X | X |   |   | X | X | X |   |
| BDKRB2   | NM_000623 | 0  | -1 | 0  | 0  |   | X |   | X | X | X | X | X |   |   |
| BET1     | NM_005868 | -1 | -1 | 1  | -1 |   | X | X |   | X |   | X | X | X |   |
| BLCAP    | NM_006698 | -1 | -1 | 0  | 0  | X | X |   | X |   | X | X | X |   |   |
| BMP1     | NM_001199 | -1 | -1 | -1 | 0  | X |   | X |   | X | X | X | X |   |   |
| BMP1     | NM_006129 | 0  | 0  | -1 | -1 | X |   | X |   | X | X | X | X |   |   |
| BMP1     | NM_006128 | -1 | 0  | -1 | 0  | X |   | X |   | X | X | X | X |   |   |
| BRD1     | NM_014577 | 0  | 0  | -1 | 0  | X |   |   | X | X | X | X | X |   |   |
| C10orf68 | NM_024688 | -1 | -1 | 0  | 0  |   |   | X | X | X |   | X |   | X | X |
| C15orf27 | NM_152335 | 0  | -1 | 1  | 0  |   | X |   | X |   | X | X | X | X |   |
| C7orf41  | NM_152793 | 1  | -1 | 0  | -1 | X | X | X | X | X | X |   |   |   |   |
| C9orf114 | NM_016390 | 0  | 0  | -1 | 0  |   | X | X | X | X |   | X |   | X |   |
| CACNB1   | NM_000723 | -1 | -1 | -1 | 0  | X | X | X |   |   | X |   | X | X |   |
| CALML4   | NM_033429 | 0  | -1 | 0  | -1 | X | X | X | X |   | X |   |   | X |   |
| CAMKK1   | NM_032294 | 1  | -1 | -1 | -1 |   | X | X | X | X |   | X | X | X |   |
| CAPS2    | NM_032606 | -1 | 0  | 0  | 0  |   | X | X | X | X | X |   | X |   |   |
| CAPS2    | AK091839  | -1 | 0  | 0  | 0  |   | X | X | X | X | X |   | X |   |   |
| CAV1     | NM_001753 | 1  | 0  | -1 | 1  | X |   | X | X | X | X |   |   |   | X |
| CBLB     | NM_170662 | -1 | 0  | 0  | -1 | X |   |   | X | X | X | X |   |   | X |
| CBX7     | NM_175709 | 0  | -1 | -1 | -1 | X | X | X |   |   | X |   | X | X |   |
| CCDC113  | NM_014157 | -1 | 0  | 1  | -1 |   | X | X |   | X |   | X | X | X |   |
| CCDC43   | NM_144609 | -1 | 0  | 0  | -1 |   |   | X | X |   | X | X | X |   | X |
| CCDC57   | NM_198082 | -1 | 0  | -1 | 0  |   | X |   |   | X |   | X | X | X | X |
| CCPG1    | NM_020739 | -1 | -1 | 1  | -1 |   |   |   | X | X | X | X |   | X | X |
| CCPG1    | AF011794  | -1 | 0  | 1  | 0  |   |   |   | X | X | X | X |   | X | X |
| CCPG1    | NM_004748 | -1 | 0  | 1  | 0  |   |   |   | X | X | X | X |   | X | X |
| CDCP1    | NM_022842 | 0  | 0  | -1 | -1 | X |   |   | X | X |   | X | X | X |   |
| CDH10    | NM_006727 | 1  | -1 | 0  | 1  |   |   |   | X | X | X | X |   | X | X |
| CDH23    | NM_022124 | 0  | -1 | 0  | 0  |   | X | X | X |   | X |   | X | X |   |

|         |              |    |    |    |    |   |   |   |   |   |   |   |   |   |   |
|---------|--------------|----|----|----|----|---|---|---|---|---|---|---|---|---|---|
| CDH3    | NM_001793    | 0  | 0  | -1 | 1  |   | X |   |   | X | X | X |   | X | X |
| CDKL2   | NM_003948    | 1  | -1 | 1  | -1 | X | X |   | X | X |   | X | X |   |   |
| CEPT1   | NM_001007794 | -1 | 0  | -1 | 0  |   | X |   | X | X | X | X | X |   |   |
| CHD3    | NM_001005273 | -1 | 0  | 0  | -1 |   |   | X |   | X | X | X | X | X |   |
| CLDN1   | NM_021101    | 0  | 1  | -1 | 0  | X |   | X | X | X |   | X |   |   | X |
| CLK3    | NM_003992    | 0  | 1  | -1 | 1  | X | X | X | X |   |   |   | X | X |   |
| COL27A1 | NM_032888    | 1  | -1 | -1 | -1 | X |   |   | X | X | X |   | X | X |   |
| COL6A3  | NM_004369    | -1 | -1 | -1 | 1  | X |   | X | X | X |   | X |   | X |   |
| COX19   | NM_001031617 | -1 | -1 | -1 | -1 | X |   |   | X | X | X | X | X |   | X |
| CPS1    | NM_001875    | 0  | -1 | 1  | 1  | X |   | X |   | X |   | X | X | X |   |
| CRTAP   | NM_006371    | 0  | -1 | -1 | 0  | X |   | X |   | X | X |   |   | X | X |
| CRYZL1  | AK057604     | -1 | 0  | 0  | 0  | X | X |   | X | X | X |   | X |   |   |
| CTNND1  | NM_001331    | 0  | 0  | -1 | 0  | X |   | X | X | X | X | X |   |   |   |
| DCLK2   | NM_001040260 | 0  | -1 | 0  | 0  | X |   | X |   | X |   | X | X | X |   |
| DDX52   | AK025721     | -1 | 0  | 1  | -1 | X |   | X | X | X |   | X |   |   | X |
| DEGS1   | NM_003676    | 1  | 0  | -1 | 0  |   |   | X | X | X | X | X | X |   |   |
| DEGS1   | NM_144780    | 1  | 0  | -1 | 0  |   |   | X | X | X | X | X | X |   |   |
| DGKA    | NM_201444    | -1 | -1 | 1  | 1  |   | X | X | X | X |   |   | X | X |   |
| DHFR    | NM_000791    | 0  | -1 | 1  | 1  | X | X |   |   | X | X |   | X | X |   |
| DIXDC1  | NM_033425    | 0  | -1 | 1  | 0  |   | X |   | X |   | X | X | X |   | X |
| DLG3    | NM_021120    | -1 | -1 | 1  | -1 |   | X | X | X | X | X |   | X |   |   |
| DOCK1   | NM_001380    | 0  | -1 | -1 | 0  |   | X |   | X | X | X | X | X |   |   |
| DYNC2H1 | NM_001080463 | -1 | -1 | 1  | 1  |   |   | X | X | X | X | X | X |   | X |
| DYX1C1  | NM_130810    | -1 | -1 | 1  | -1 | X |   | X |   |   | X | X |   | X | X |
| EARS2   | NM_133451    | 0  | 0  | -1 | 0  | X |   | X | X | X |   |   | X | X |   |
| EFHC1   | AY608689     | -1 | -1 | 0  | 0  | X | X |   | X |   |   | X | X | X |   |
| EHBP1   | NM_015252    | -1 | -1 | 0  | 0  | X | X |   |   | X |   | X | X | X |   |
| EIF2C1  | NM_012199    | 1  | -1 | -1 | 1  | X | X | X | X | X | X |   |   |   |   |
| ELMO2   | NM_182764    | -1 | 0  | 0  | -1 | X | X | X |   | X |   | X | X |   |   |
| ELP3    | NM_018091    | 0  | 0  | -1 | -1 | X |   | X |   | X | X |   |   | X | X |
| EME2    | AK074080     | 0  | -1 | -1 | 1  |   | X |   | X |   | X | X | X | X |   |
| ENC1    | NM_003633    | 1  | -1 | -1 | 1  |   | X |   | X | X | X | X | X |   |   |
| EPB41L1 | NM_012156    | -1 | -1 | 0  | -1 | X |   |   | X | X | X | X |   | X |   |
| EPS8    | NM_004447    | 1  | -1 | 1  | -1 | X | X |   | X | X |   |   | X | X |   |
| ERGIC1  | NM_001031711 | 0  | 0  | -1 | -1 |   | X |   | X | X | X |   | X | X |   |
| FAP     | NM_004460    | -1 | -1 | 0  | 0  |   | X |   | X | X |   | X | X | X |   |
| FBN1    | NM_000138    | -1 | 0  | 1  | 0  |   |   | X | X | X | X | X | X | X |   |
| FCHSD1  | NM_033449    | -1 | -1 | -1 | -1 | X |   |   |   |   | X | X | X | X | X |
| FGF2    | NM_002006    | 1  | 0  | -1 | -1 | X |   | X | X | X | X | X |   |   |   |
| FGF7    | NM_002009    | 0  | -1 | 1  | -1 |   | X |   | X | X | X | X | X |   |   |
| FNBP1   | NM_015033    | -1 | 0  | -1 | 1  | X |   |   | X |   | X | X | X | X |   |
| FOXC1   | NM_001453    | 1  | 1  | -1 | 0  | X |   |   | X | X | X | X |   |   | X |
| FXN     | NM_181425    | 0  | 0  | -1 | 1  |   |   | X |   | X | X | X | X |   | X |
| GALNT5  | NM_014568    | -1 | -1 | 1  | 0  | X |   | X |   | X | X | X |   | X |   |
| GJA1    | NM_000165    | 1  | 1  | -1 | 1  | X |   |   | X | X | X | X |   |   | X |
| GJA1    | NM_000165    | 1  | 1  | -1 | 1  | X |   |   | X | X | X | X |   |   | X |
| GJA5    | NM_005266    | -1 | 1  | 0  | 0  | X |   | X | X | X | X | X |   |   |   |
| GPR135  | NM_022571    | 1  | 0  | -1 | 0  |   |   |   | X | X | X | X | X | X |   |
| HDAC5   | NM_001015053 | -1 | 1  | -1 | 0  | X |   | X |   |   | X | X | X | X |   |
| HECW2   | NM_020760    | 1  | -1 | 1  | 0  |   | X | X |   | X | X | X |   | X |   |
| HECW2   | NM_020760    | 1  | -1 | 1  | 0  |   | X | X |   | X | X | X |   | X |   |
| HFE     | NM_139009    | -1 | 1  | -1 | -1 | X |   | X | X | X | X | X |   |   |   |
| HLCS    | NM_000411    | -1 | 0  | -1 | -1 | X |   |   | X | X | X | X |   | X |   |
| HOMEZ   | NM_020834    | 0  | -1 | -1 | -1 | X | X |   | X | X | X |   | X |   |   |
| IFT172  | NM_015662    | -1 | -1 | 1  | 0  | X |   | X | X | X |   | X | X |   |   |
| IGSF10  | NM_178822    | 0  | -1 | 1  | 1  |   |   | X | X | X | X | X |   | X |   |
| IKBKB   | NM_001556    | 0  | 0  | -1 | -1 | X | X | X |   | X |   | X | X |   |   |
| IL20RB  | NM_144717    | -1 | 0  | 0  | -1 | X | X |   |   | X | X | X |   | X |   |
| INADL   | NM_176877    | -1 | 0  | 0  | -1 | X | X |   |   | X | X | X |   | X |   |
| IRF2BP2 | NM_182972    | -1 | 0  | -1 | -1 | X |   |   | X | X | X | X |   |   | X |
| ISY1    | NM_020701    | -1 | -1 | -1 | -1 |   |   | X |   | X | X | X | X | X |   |
| ITFG1   | NM_030790    | -1 | 0  | 1  | 1  |   | X |   | X | X | X | X | X |   |   |
| ITPR2   | NM_002223    | -1 | 0  | 1  | -1 |   | X |   |   | X | X | X | X | X |   |
| JAG2    | NM_002226    | 1  | 0  | -1 | 1  | X |   | X |   | X | X | X | X |   |   |
| JAK3    | BC028068     | -1 | -1 | -1 | 1  | X |   | X |   |   | X | X | X | X |   |
| JOSD1   | NM_014876    | -1 | -1 | -1 | 0  |   | X |   |   | X | X | X | X | X |   |

|           |              |    |    |    |    |   |   |   |   |   |   |   |   |   |   |
|-----------|--------------|----|----|----|----|---|---|---|---|---|---|---|---|---|---|
| KCNK2     | NM_001017424 | 1  | -1 | -1 | 1  | X | X |   | X | X | X |   | X |   |   |
| KIAA1109  | BC108274     | -1 | 0  | -1 | 0  |   |   | X | X | X | X | X |   | X |   |
| KIAA1109  | DQ335469     | -1 | 0  | 1  | 0  |   |   | X | X | X | X | X |   | X |   |
| KIAA1109  | CR936613     | -1 | 0  | 0  | 0  |   |   | X | X | X | X | X |   | X |   |
| KIAA1211  | AL133028     | -1 | -1 | 1  | -1 |   | X | X |   | X | X |   | X | X |   |
| KIDINS220 | NM_020738    | -1 | 0  | 1  | 0  |   |   | X | X | X | X | X |   | X |   |
| KIF13B    | NM_015254    | 0  | -1 | 0  | 0  | X |   |   |   | X | X |   | X | X | X |
| KLHDC4    | AY251274     | -1 | 0  | 0  | -1 |   |   |   |   | X | X | X | X | X | X |
| LAMC1     | NM_002293    | 0  | 0  | -1 | 1  | X |   | X | X |   | X | X |   | X |   |
| LGR4      | NM_018490    | 1  | 0  | -1 | 1  | X | X |   |   | X | X |   | X | X |   |
| LONP2     | NM_031490    | 1  | -1 | 0  | 0  | X |   | X | X | X | X | X |   |   |   |
| LRRFIP1   | BC010662     | -1 | -1 | 0  | 0  | X | X |   | X | X | X |   | X |   |   |
| LRRK1     | NM_024652    | 0  | 0  | -1 | 0  |   | X | X |   | X |   | X | X | X |   |
| LTBP1     | NM_206943    | 1  | -1 | 0  | 0  | X | X |   | X | X |   | X | X |   |   |
| MAB21L2   | NM_006439    | 0  | -1 | -1 | 0  |   |   | X | X | X |   |   | X | X | X |
| MAGI2     | NM_012301    | 0  | 0  | -1 | -1 | X |   |   | X |   | X | X |   | X | X |
| MAP2K6    | NM_002758    | -1 | -1 | 1  | 1  | X |   |   |   | X | X | X |   | X | X |
| MAP4      | NM_002375    | 0  | -1 | -1 | -1 | X |   |   | X |   | X | X |   | X | X |
| MAPK10    | NM_138980    | -1 | -1 | -1 | 1  | X |   | X | X | X |   | X | X |   |   |
| MAPKAP1   | NM_001006617 | -1 | 0  | -1 | -1 |   | X | X | X | X | X |   |   | X |   |
| MARCH3    | NM_178450    | 1  | -1 | 0  | -1 | X |   | X | X | X |   | X |   | X |   |
| MCF2L     | AK092739     | -1 | -1 | 0  | 0  |   | X |   | X | X | X | X | X |   |   |
| METTL3    | AK097873     | -1 | 0  | -1 | 0  |   |   | X |   | X | X | X | X |   | X |
| MIB2      | NM_080875    | -1 | 1  | -1 | 0  |   | X | X |   |   |   | X | X | X | X |
| MKRN2     | NM_014160    | -1 | 0  | 0  | 0  |   |   |   | X | X | X | X | X | X |   |
| MTHFR     | NM_005957    | -1 | -1 | 1  | -1 |   |   | X |   | X | X | X | X | X |   |
| MYT1      | NM_004535    | -1 | -1 | 0  | 1  |   |   |   | X | X | X | X | X | X |   |
| NAGA      | NM_000262    | -1 | 0  | -1 | 0  |   |   | X |   | X | X | X | X | X |   |
| NEDD9     | NM_006403    | 0  | -1 | 0  | 1  | X | X | X | X | X |   |   |   | X |   |
| NEK11     | NM_024800    | -1 | 0  | -1 | -1 |   |   | X | X | X |   | X | X |   | X |
| NEK11     | NM_145910    | -1 | 0  | -1 | -1 |   |   | X | X | X |   | X | X |   | X |
| NF2       | NM_181831    | 1  | -1 | 0  | 0  | X |   | X | X |   | X | X |   | X |   |
| NF2       | NM_181832    | -1 | -1 | 0  | 0  | X |   | X | X |   | X | X |   | X |   |
| NFE2L1    | NM_003204    | -1 | 0  | -1 | -1 | X |   |   | X |   | X | X | X | X |   |
| NOL9      | NM_024654    | 1  | 0  | -1 | 1  |   | X | X | X |   | X | X | X |   |   |
| NSFL1C    | NM_016143    | -1 | 0  | -1 | -1 |   | X | X | X | X | X |   | X |   |   |
| NUAK1     | NM_014840    | 0  | 0  | -1 | 1  | X |   |   | X | X | X | X |   | X |   |
| NUB1      | NM_016118    | -1 | 0  | -1 | 0  | X |   | X | X | X | X |   |   | X |   |
| NUBPL     | NM_025152    | 0  | 0  | -1 | -1 |   |   | X | X | X | X |   |   | X | X |
| NUDT19    | XM_372723    | 0  | -1 | -1 | -1 | X | X |   |   | X |   |   | X | X | X |
| NUP43     | NM_198887    | 0  | -1 | 1  | 0  | X |   |   | X | X | X | X |   | X |   |
| OGT       | NM_181672    | -1 | -1 | 0  | 0  |   | X | X | X |   | X | X | X |   |   |
| PAM       | NM_138822    | 0  | -1 | -1 | 1  | X | X |   |   | X | X | X | X |   |   |
| PANK2     | AL713654     | 0  | 0  | -1 | 0  |   |   | X | X | X | X | X | X |   |   |
| PAQR8     | NM_133367    | -1 | -1 | 0  | -1 | X |   | X | X | X |   | X | X |   |   |
| PATZ1     | NM_032051    | 0  | -1 | -1 | 1  | X |   | X |   | X | X | X |   | X |   |
| PATZ1     | NM_014323    | 0  | 0  | -1 | 0  | X |   | X |   | X | X | X |   | X |   |
| PBLD      | NM_022129    | -1 | -1 | 0  | 0  | X |   | X | X | X |   | X | X |   |   |
| PCDH7     | NM_032457    | 1  | -1 | -1 | 0  |   |   |   | X | X | X | X | X | X |   |
| PCMTD1    | NM_052937    | -1 | -1 | 0  | -1 |   | X |   | X | X | X |   | X | X |   |
| PCMTD1    | AF293366     | -1 | 0  | 0  | 0  |   | X |   | X | X | X |   | X | X |   |
| PDCD2     | NM_002598    | 0  | -1 | -1 | 0  |   | X | X | X | X |   |   | X | X |   |
| PDCD4     | NM_145341    | 1  | -1 | 0  | 0  | X | X |   | X | X | X |   | X |   |   |
| PDPK1     | NM_002613    | -1 | 0  | 0  | -1 |   |   | X | X | X | X | X |   | X |   |
| PFKFB3    | NM_004566    | 1  | -1 | 0  | 0  | X | X |   |   | X | X | X | X |   |   |
| PHKB      | NM_000293    | -1 | -1 | 0  | 0  |   | X |   | X | X | X | X | X |   |   |
| PIK3C2B   | NM_002646    | -1 | 0  | -1 | 0  |   |   | X | X | X | X | X | X |   |   |
| PIP5K1B   | NM_003558    | 0  | -1 | 0  | -1 | X | X | X |   | X | X |   | X |   |   |
| PLEKHG1   | NM_001029884 | 0  | 0  | 1  | -1 |   | X |   |   | X |   | X | X | X | X |
| PLEKHM1   | NM_014798    | -1 | 0  | 0  | -1 | X | X | X |   |   |   | X | X | X |   |
| PNPLA4    | NM_004650    | 0  | 0  | -1 | -1 |   | X |   | X |   | X | X | X | X |   |
| POLH      | AK025631     | -1 | -1 | 1  | 1  | X | X | X | X |   |   |   | X | X |   |
| PPIL2     | NM_148175    | -1 | 0  | -1 | 1  |   |   | X | X | X | X | X | X |   |   |
| PPIL6     | NM_173672    | -1 | 0  | -1 | -1 |   | X | X | X | X | X | X |   |   |   |
| PPM1B     | NM_177968    | 1  | -1 | 1  | 1  | X |   |   | X | X | X | X | X |   | X |
| PREPL     | NM_006036    | -1 | -1 | 1  | -1 | X |   | X | X | X | X | X |   |   |   |

|          |              |    |    |    |    |   |   |   |   |   |   |   |   |   |   |
|----------|--------------|----|----|----|----|---|---|---|---|---|---|---|---|---|---|
| PRICKLE1 | NM_153026    | 1  | 0  | -1 | 0  | X |   | X | X | X |   |   | X | X |   |
| PSMD5    | NM_005047    | 0  | 0  | -1 | 1  | X | X |   | X | X |   |   | X | X |   |
| PSMD8    | BC071826     | 0  | 0  | -1 | -1 |   | X | X | X | X |   | X | X |   |   |
| PTAFR    | NM_000952    | 0  | -1 | 0  | 0  | X |   | X | X |   | X | X |   | X |   |
| QSOX2    | NM_181701    | 0  | 0  | -1 | 0  |   | X | X |   | X | X | X | X |   |   |
| RAB31    | NM_006868    | -1 | 0  | -1 | -1 | X | X |   |   | X |   | X | X |   | X |
| RABIF    | NM_002871    | 0  | -1 | -1 | -1 | X |   | X | X |   | X | X | X |   |   |
| RABL3    | NM_173825    | -1 | 0  | -1 | -1 |   | X | X | X | X | X |   | X |   |   |
| RAPGEF1  | NM_198679    | 0  | 0  | -1 | -1 | X |   | X | X | X |   | X |   | X |   |
| RBM15B   | NM_013286    | 0  | 0  | -1 | 0  | X | X |   | X | X |   | X | X |   |   |
| RECK     | BC060806     | -1 | 1  | 1  | 1  | X |   |   | X | X | X | X | X |   |   |
| RECK     | NM_021111    | -1 | 0  | 0  | 0  | X |   |   | X | X | X | X | X |   |   |
| RFX1     | NM_002918    | 0  | 0  | -1 | 1  | X | X |   | X |   | X |   | X | X |   |
| RNF145   | NM_144726    | -1 | -1 | 0  | 0  | X |   |   | X | X | X | X | X |   |   |
| RNF207   | NM_207396    | 0  | -1 | -1 | 1  |   |   | X |   | X |   | X | X | X | X |
| RORB     | BX647070     | -1 | 0  | 0  | -1 | X | X |   | X | X |   | X | X |   |   |
| SAMD4A   | AB028976     | 0  | 1  | -1 | 0  | X | X |   | X | X | X |   | X |   |   |
| SAMD5    | NM_001030060 | 1  | -1 | 1  | 0  |   | X |   | X | X | X | X |   | X |   |
| SCN9A    | NM_002977    | -1 | 1  | 1  | -1 | X |   |   |   | X | X | X |   | X | X |
| SCRN1    | NM_014766    | -1 | -1 | -1 | 0  |   | X | X | X |   | X |   | X | X |   |
| SCRN2    | NM_138355    | -1 | -1 | -1 | 0  | X |   | X | X | X | X |   | X |   |   |
| SCRN3    | NM_024583    | -1 | -1 | 1  | -1 | X |   |   |   | X | X | X | X | X |   |
| SDCBP    | AK128645     | -1 | 1  | 1  | -1 | X | X |   |   | X | X | X | X |   |   |
| SDCBP    | NM_005625    | -1 | 1  | 0  | -1 | X | X |   |   | X | X | X | X |   |   |
| SEMA3E   | NM_012431    | 0  | 1  | -1 | -1 | X |   |   | X | X | X | X |   | X |   |
| SF3B3    | D13642       | -1 | -1 | -1 | -1 |   |   | X | X | X | X | X |   | X |   |
| SH3BP2   | NM_003023    | 0  | -1 | 0  | 0  | X | X | X | X |   |   | X | X |   |   |
| SHC1     | NM_183001    | -1 | 1  | -1 | 1  | X |   |   | X | X | X | X |   | X |   |
| SHC1     | NM_003029    | -1 | 1  | -1 | 0  | X |   |   | X | X | X | X |   | X |   |
| SHH      | NM_000193    | 1  | 0  | -1 | 1  | X | X |   | X | X | X |   | X |   |   |
| SLC13A2  | NM_003984    | 0  | 0  | -1 | -1 |   | X | X |   |   |   | X | X | X | X |
| SLC24A1  | NM_004727    | -1 | 0  | -1 | 0  |   |   |   | X | X | X | X | X | X |   |
| SLC25A30 | NM_001010875 | -1 | 1  | 0  | -1 | X | X | X |   | X | X |   |   | X |   |
| SLC46A1  | NM_080669    | 1  | -1 | -1 | -1 | X |   | X |   |   | X | X |   | X | X |
| SLC8A1   | NM_021097    | 0  | -1 | -1 | 1  |   |   | X | X | X | X | X | X |   |   |
| SLC8A1   | NM_021097    | 0  | -1 | -1 | 1  |   |   | X | X | X | X | X | X |   |   |
| SLC9A9   | NM_173653    | 1  | -1 | 0  | -1 | X | X |   |   | X | X | X | X |   |   |
| SLU7     | NM_006425    | -1 | -1 | 1  | -1 |   |   |   | X | X | X | X |   | X | X |
| SMPDL3A  | NM_006714    | -1 | 1  | 0  | -1 | X | X |   | X |   | X |   | X | X |   |
| SPTBN1   | NM_178313    | -1 | 1  | -1 | 1  | X |   | X |   | X |   | X | X |   | X |
| SPTBN1   | NM_003128    | -1 | 1  | -1 | 0  | X |   | X |   | X |   | X | X |   | X |
| STARD13  | NM_178006    | 0  | 0  | -1 | 1  |   |   |   | X | X | X | X | X | X |   |
| STEAP3   | NM_182915    | 1  | 0  | -1 | -1 | X |   | X |   |   | X | X | X | X |   |
| SUMF1    | NM_182760    | -1 | 0  | -1 | 0  | X |   | X | X |   |   | X |   | X | X |
| SUSD1    | NM_022486    | 1  | -1 | -1 | 0  |   | X | X |   | X |   | X | X | X |   |
| SVIL     | NM_021738    | -1 | -1 | -1 | 1  | X | X |   | X | X | X | X |   |   |   |
| TBC1D2B  | NM_015079    | 0  | -1 | -1 | 0  | X | X | X |   | X | X |   | X |   |   |
| TBC1D5   | NM_014744    | 0  | -1 | -1 | 0  | X |   | X |   | X | X | X |   | X |   |
| TENC1    | NM_015319    | 1  | 0  | -1 | 1  |   | X |   | X |   | X | X | X | X |   |
| THTPA    | NM_024328    | 0  | -1 | -1 | 1  | X |   | X | X |   | X |   | X | X |   |
| TLE1     | NM_005077    | 0  | 1  | 1  | -1 |   | X |   | X |   | X | X | X | X |   |
| TLE3     | NM_005078    | 1  | 1  | -1 | 1  |   |   | X | X | X | X | X | X |   | X |
| TLE3     | AB046767     | 0  | 1  | -1 | 1  |   |   | X | X | X | X | X | X |   | X |
| TNFAIP2  | NM_006291    | 1  | -1 | 0  | -1 | X | X | X | X | X |   |   | X |   |   |
| TNFRSF21 | NM_014452    | 1  | 0  | -1 | 0  | X |   |   | X | X | X | X |   | X |   |
| TOM1     | NM_005488    | -1 | -1 | -1 | -1 | X |   | X | X |   | X | X |   | X |   |
| TOM1L1   | NM_005486    | -1 | 0  | 0  | -1 | X | X | X |   | X |   | X | X |   |   |
| TOP3B    | NM_003935    | 0  | -1 | -1 | -1 | X | X | X |   |   |   | X | X | X |   |
| TPK1     | NM_022445    | 0  | -1 | 1  | -1 | X | X |   |   | X | X | X | X |   |   |
| TPM1     | NM_000366    | -1 | 1  | 1  | 1  | X |   |   | X | X |   | X | X | X |   |
| TPM1     | NM_000366    | -1 | 1  | 1  | 1  | X |   |   | X | X |   | X | X | X |   |
| TPM1     | NM_001018004 | -1 | 0  | 0  | 1  | X |   |   | X | X |   | X | X | X |   |
| TRA2A    | NM_013293    | 0  | -1 | -1 | 0  |   | X |   | X |   | X | X | X | X |   |
| TRAK1    | NM_001042646 | 0  | 0  | -1 | 0  | X | X |   | X |   | X | X |   | X |   |
| TSC22D4  | NM_030935    | -1 | -1 | -1 | 0  | X |   | X |   | X | X |   | X | X |   |
| TSHZ1    | NM_005786    | 0  | -1 | -1 | 0  | X | X |   | X | X | X | X |   |   |   |

|           |              |    |    |    |    |   |   |   |   |   |   |   |   |   |   |
|-----------|--------------|----|----|----|----|---|---|---|---|---|---|---|---|---|---|
| TSLP      | NM_033035    | 1  | -1 | 0  | -1 | X |   | X | X | X | X | X |   |   |   |
| TSPAN14   | NM_030927    | 0  | 1  | -1 | 0  | X | X | X |   |   |   | X |   | X | X |
| TTC23     | NM_022905    | -1 | -1 | 0  | 0  |   | X |   |   | X | X | X | X | X |   |
| TWIST2    | NM_051719    | 0  | -1 | -1 | 0  | X |   | X | X |   |   |   | X | X | X |
| UBE2E2    | NM_152653    | 0  | 0  | -1 | -1 |   | X |   | X | X | X | X | X |   |   |
| UBP1      | NM_014517    | 0  | 0  | -1 | 0  |   | X |   | X | X | X |   | X |   | X |
| USP2      | BC041366     | -1 | 1  | 1  | 0  | X |   | X |   | X | X | X |   | X |   |
| USP44     | NM_032147    | 1  | -1 | 0  | 1  |   | X |   |   | X | X | X | X | X |   |
| USP47     | NM_017944    | -1 | 0  | 0  | -1 | X | X |   |   | X | X | X | X |   |   |
| USP54     | NM_152586    | 0  | -1 | 0  | 0  | X | X | X | X |   |   |   | X | X |   |
| UST       | NM_005715    | -1 | -1 | 0  | -1 | X |   |   | X | X |   | X | X | X |   |
| UVRAG     | NM_003369    | 0  | 0  | -1 | 0  | X |   |   |   | X | X | X | X | X |   |
| VT11B     | NM_006370    | -1 | 0  | 0  | 0  | X |   | X |   | X | X | X | X |   |   |
| WT1       | NM_024424    | 0  | 0  | -1 | -1 |   | X |   | X | X | X | X | X |   |   |
| ZBTB4     | NM_020899    | 0  | -1 | -1 | -1 |   |   | X | X | X | X |   | X | X |   |
| ZDHHC11   | NM_024786    | -1 | 1  | 1  | -1 | X |   | X |   | X | X |   | X | X |   |
| ZIC1      | NM_003412    | -1 | 0  | -1 | 0  |   | X | X | X | X | X |   | X |   |   |
| ZNF33A    | AK027057     | -1 | -1 | 0  | -1 | X |   |   | X | X | X | X |   | X |   |
| ZNF33B    | NM_006955    | 0  | -1 | 0  | 0  | X |   |   | X | X | X | X |   | X |   |
| ZNF583    | NM_152478    | -1 | 0  | 1  | 0  |   |   | X | X | X | X | X |   | X |   |
| ZSCAN20   | NM_145238    | 0  | 1  | -1 | 0  | X |   |   | X |   | X | X |   | X | X |
| ABCC1     | NM_019862    | 0  | -1 | -1 | -1 | X |   | X |   |   | X | X |   | X |   |
| ABCC3     | NM_003786    | 1  | 0  | -1 | -1 | X |   | X | X |   |   | X | X |   |   |
| ABCF2     | NM_007189    | 0  | 0  | -1 | -1 | X | X |   |   |   |   | X | X | X |   |
| ABCG1     | NM_207630    | 0  | -1 | -1 | -1 |   | X | X | X |   | X |   | X |   |   |
| ACAD11    | NM_032169    | -1 | 0  | -1 | 1  | X | X |   | X |   |   |   | X | X |   |
| ACSL3     | NM_004457    | -1 | 1  | 1  | -1 |   |   |   | X | X | X | X |   |   | X |
| ACSM3     | NM_202000    | -1 | -1 | 1  | 0  |   | X |   |   | X | X | X | X |   |   |
| ACYP2     | NM_138448    | -1 | -1 | -1 | -1 |   |   | X |   | X | X | X |   | X |   |
| ADAMTS15  | NM_139055    | -1 | 0  | -1 | 0  |   | X |   | X |   |   | X | X | X |   |
| AHNAK     | NM_001620    | 1  | -1 | -1 | -1 | X | X | X |   | X | X |   |   |   |   |
| AHNAK     | NM_001620    | 1  | -1 | -1 | -1 | X | X | X |   | X | X |   |   |   |   |
| AHNAK2    | BC090889     | 1  | -1 | 1  | -1 | X | X | X |   |   | X |   | X |   |   |
| AMOTL2    | NM_016201    | 1  | 0  | -1 | 1  |   |   | X |   | X | X | X |   | X |   |
| ANGPTL2   | NM_012098    | -1 | -1 | -1 | 1  | X |   | X |   | X |   | X |   | X |   |
| ANKMY1    | NM_017844    | -1 | 0  | -1 | -1 | X | X | X |   |   |   | X |   | X |   |
| ANKMY1    | AL136618     | -1 | 1  | -1 | 0  | X | X | X |   |   |   | X |   | X |   |
| ANKMY1    | NM_016552    | -1 | 0  | -1 | 0  | X | X | X |   |   |   | X |   | X |   |
| ANKS6     | NM_173551    | 0  | -1 | -1 | 0  | X |   | X |   | X | X | X |   |   |   |
| AP1S3     | NM_001039569 | 1  | -1 | 1  | 1  |   |   |   |   | X | X | X | X | X |   |
| ARID1B    | NM_175863    | 0  | -1 | -1 | -1 |   |   |   |   | X | X | X | X | X |   |
| ARID1B    | NM_017519    | 0  | -1 | -1 | 1  |   |   |   |   | X | X | X | X | X |   |
| ASAH1     | AK025211     | -1 | -1 | 1  | 1  |   | X |   |   | X | X | X | X |   |   |
| ASAH1     | NM_004315    | 0  | -1 | 0  | 1  |   | X |   |   | X | X | X | X |   |   |
| ATP10A    | NM_024490    | 1  | 1  | -1 | -1 |   |   | X |   |   | X | X | X | X |   |
| ATP6AP1   | NM_001183    | -1 | -1 | 1  | -1 |   |   | X |   | X |   | X | X | X |   |
| BAI3      | NM_001704    | -1 | 0  | 1  | 0  |   |   |   |   | X | X | X |   | X | X |
| BBS7      | NM_176824    | -1 | -1 | 0  | -1 |   |   |   | X | X | X | X |   | X |   |
| BCOR      | NM_017745    | 1  | 1  | -1 | 1  | X |   |   |   | X | X | X |   | X |   |
| BHLHB9    | NM_030639    | -1 | 0  | -1 | 0  | X |   | X | X | X | X |   |   |   |   |
| C10orf32  | NM_144591    | -1 | -1 | -1 | 0  | X |   |   | X | X | X | X |   |   |   |
| C14orf102 | AK024113     | -1 | 0  | -1 | 0  | X | X | X |   | X | X |   |   |   |   |
| C1QTNF3   | NM_181435    | -1 | -1 | 0  | 1  | X |   | X | X | X |   |   |   |   | X |
| C1R       | NM_001733    | -1 | 0  | -1 | 1  | X | X | X | X |   |   |   | X |   |   |
| C1RL      | NM_016546    | -1 | 0  | -1 | -1 |   | X |   | X |   |   |   | X | X | X |
| C3orf62   | NM_198562    | -1 | 0  | -1 | 0  | X | X |   |   | X | X |   | X |   |   |
| C4orf33   | NM_173487    | -1 | -1 | 1  | 0  |   |   | X | X | X | X | X |   |   |   |
| C6orf89   | NM_152734    | -1 | 0  | 0  | 0  | X |   | X |   | X |   |   | X |   | X |
| C7orf31   | NM_138811    | -1 | 0  | 0  | 0  | X |   |   | X | X | X |   |   | X |   |
| CA12      | NM_001218    | -1 | 0  | 0  | 1  | X |   |   |   | X |   | X | X | X |   |
| CA12      | AK000158     | -1 | -1 | 0  | 1  | X |   |   |   | X |   | X | X | X |   |
| CA12      | NM_001218    | -1 | 0  | 0  | 1  | X |   |   |   | X |   | X | X | X |   |
| CABLES2   | NM_031215    | -1 | -1 | 1  | -1 | X |   |   |   |   | X | X | X | X |   |
| CALCOCO2  | NM_005831    | -1 | -1 | 0  | -1 |   | X |   | X |   | X | X | X |   |   |
| CAMK2N1   | NM_018584    | 0  | -1 | 1  | -1 |   | X |   |   | X |   | X | X | X |   |
| CBX1      | NM_006807    | -1 | 0  | 0  | 0  | X | X |   |   |   | X | X | X |   |   |

|         |              |    |    |    |    |   |   |   |   |   |   |   |   |   |   |
|---------|--------------|----|----|----|----|---|---|---|---|---|---|---|---|---|---|
| CCDC122 | NM_144974    | -1 | 0  | -1 | -1 |   |   | X |   | X |   | X |   | X | X |
| CCNL2   | NM_030937    | -1 | 0  | 0  | 1  | X |   | X |   | X | X |   | X |   |   |
| CD59    | NM_203330    | -1 | 0  | -1 | 1  | X |   |   | X | X | X |   |   | X |   |
| CD72    | NM_001782    | -1 | 0  | -1 | 1  |   | X | X | X |   |   | X |   |   | X |
| CD8A    | NM_001768    | -1 | -1 | -1 | -1 |   | X | X | X |   | X |   | X |   |   |
| CD99L2  | NM_031462    | -1 | 0  | 0  | 1  |   |   | X | X |   | X | X |   | X |   |
| CDH1    | NM_004360    | 0  | 1  | -1 | 0  | X |   |   | X | X | X |   |   | X |   |
| CDH26   | NM_021810    | -1 | -1 | 0  | 0  |   |   | X | X | X | X | X |   |   |   |
| CDK9    | NM_001261    | 1  | 1  | -1 | 0  |   |   | X | X | X | X |   |   | X |   |
| CDRT1   | NM_006382    | -1 | 0  | -1 | 0  |   | X |   | X |   | X | X | X |   |   |
| CEACAM1 | NM_001024912 | 1  | -1 | -1 | 0  | X |   |   | X | X | X | X |   |   |   |
| CEACAM1 | NM_001712    | 0  | 0  | -1 | 0  | X |   |   | X | X | X | X |   |   |   |
| CENPJ   | NM_018451    | -1 | 1  | 1  | 0  |   | X |   |   | X | X | X | X |   |   |
| CEP170  | NM_014812    | 1  | -1 | 0  | 0  | X |   | X | X | X |   | X |   |   |   |
| CHCHD5  | NM_032309    | -1 | 0  | -1 | -1 |   |   | X | X | X | X |   | X |   |   |
| CHRA1   | NM_017444    | -1 | 0  | 0  | 1  |   | X |   | X | X | X |   | X |   |   |
| CLGN    | NM_004362    | -1 | 1  | 1  | -1 |   |   |   | X | X | X | X |   | X |   |
| CLIP2   | NM_003388    | 0  | 0  | -1 | 0  |   |   |   | X |   | X | X | X | X | X |
| CLIP3   | NM_015526    | 0  | 0  | -1 | 1  | X |   | X | X |   |   |   | X | X |   |
| CLN5    | NM_006493    | -1 | -1 | -1 | 0  | X |   | X |   | X | X | X |   |   |   |
| CMTM3   | NM_144601    | 0  | 0  | -1 | 0  |   | X | X |   | X |   | X | X |   |   |
| CNN3    | NM_001839    | -1 | 1  | 1  | 1  | X |   |   | X | X |   | X | X |   |   |
| CNP     | NM_033133    | 0  | -1 | -1 | 1  |   |   | X | X | X | X | X |   |   |   |
| COL13A1 | NM_005203    | 1  | 1  | -1 | -1 |   |   | X |   | X | X |   | X | X |   |
| COL21A1 | NM_030820    | 0  | -1 | 1  | 1  |   |   |   | X | X | X |   | X |   | X |
| COL3A1  | NM_000090    | -1 | 1  | 0  | 0  |   |   |   | X | X | X | X |   |   | X |
| CORO7   | NM_024535    | 0  | 0  | -1 | -1 | X | X | X |   |   |   |   | X | X |   |
| CRAT    | NM_000755    | 0  | 1  | -1 | 0  | X | X |   | X | X |   |   | X |   |   |
| CSAD    | NM_015989    | -1 | -1 | 1  | 1  |   |   |   |   | X | X | X |   | X | X |
| CSNK1E  | NM_152221    | 0  | 1  | -1 | 1  |   |   | X | X | X | X | X |   |   |   |
| CSPG4   | NM_001897    | -1 | -1 | -1 | 1  |   |   | X | X |   |   | X | X | X |   |
| CTBS    | BC024007     | -1 | 0  | 0  | -1 |   |   |   | X | X | X | X | X |   |   |
| CUBN    | NM_001081    | 0  | -1 | 0  | -1 |   | X |   |   | X |   | X | X | X |   |
| DMKN    | NM_033317    | -1 | -1 | -1 | 1  | X |   | X |   | X | X | X |   |   |   |
| DOCK11  | NM_144658    | 1  | -1 | 1  | 0  |   |   |   | X | X | X |   | X | X |   |
| DOCK8   | NM_203447    | 0  | -1 | 1  | 1  |   |   | X | X | X |   | X |   | X |   |
| EIF4B   | NM_001417    | -1 | -1 | 0  | 0  |   |   |   | X | X | X | X |   | X | X |
| ENTPD7  | NM_020354    | -1 | 0  | 1  | -1 |   | X | X | X | X |   |   | X |   |   |
| ERBB2   | NM_001005862 | 0  | 0  | -1 | 0  | X |   | X |   |   |   | X | X | X |   |
| ETV5    | NM_004454    | 0  | 0  | -1 | -1 | X |   | X |   | X |   | X | X | X |   |
| EVC     | AF216184     | -1 | 0  | -1 | 0  | X |   | X |   |   |   | X | X | X |   |
| EXOC6B  | AK023791     | -1 | 0  | 0  | -1 |   |   | X | X | X | X | X |   |   |   |
| FAM123B | NM_152424    | 0  | 0  | -1 | 0  | X |   | X | X | X | X |   |   |   |   |
| FAM129B | AF151783     | 1  | 1  | -1 | 0  | X | X | X |   |   | X |   | X |   |   |
| FAM63A  | NM_018379    | 0  | -1 | 1  | 1  | X | X | X |   |   | X |   | X |   |   |
| FARP1   | NM_005766    | -1 | 0  | -1 | -1 | X |   | X |   | X | X |   |   | X |   |
| FBLIM1  | NM_017556    | -1 | 0  | -1 | -1 | X |   | X |   | X | X |   | X |   |   |
| FBLN1   | NM_006486    | -1 | 0  | -1 | 1  | X | X | X |   | X | X |   |   |   |   |
| FBLN1   | NM_001996    | 0  | 0  | -1 | 1  | X | X | X |   | X | X |   |   |   |   |
| FBXL16  | NM_153350    | 1  | -1 | -1 | -1 |   | X | X |   |   | X |   | X | X |   |
| FBXO36  | NM_174899    | -1 | -1 | 1  | 0  | X |   |   | X | X | X |   |   | X |   |
| FBXO4   | NM_012176    | -1 | -1 | -1 | 0  |   | X |   |   | X | X |   | X | X |   |
| FBXO41  | NM_001080410 | 0  | 0  | -1 | 0  |   |   |   | X |   | X | X | X | X |   |
| FBXW8   | NM_153348    | 0  | -1 | -1 | -1 | X |   |   | X |   | X |   | X | X |   |
| FKBP7   | NM_181342    | -1 | 0  | 0  | 1  |   |   | X |   | X | X | X |   |   | X |
| FKBP9   | NM_007270    | -1 | 0  | -1 | 0  |   |   | X | X | X |   | X |   |   | X |
| FLRT3   | NM_198391    | 0  | 0  | -1 | -1 | X |   |   | X | X | X | X |   |   |   |
| FOXJ2   | NM_018416    | -1 | -1 | -1 | 1  |   |   | X | X | X | X |   |   | X |   |
| GALNS   | NM_000512    | -1 | -1 | -1 | 0  |   |   | X | X | X |   |   | X | X |   |
| GATA3   | NM_001002295 | 1  | 0  | -1 | 0  | X |   |   | X | X | X |   |   |   | X |
| GCNT3   | NM_004751    | 0  | -1 | 1  | -1 |   | X | X |   |   |   | X | X | X |   |
| GEMIN8  | NM_017856    | -1 | 0  | -1 | -1 |   |   | X | X | X | X | X |   |   |   |
| GFAP    | NM_002055    | -1 | 0  | 0  | -1 | X |   |   |   | X | X |   | X | X |   |
| GIT1    | NM_014030    | 0  | 1  | -1 | 0  |   |   | X |   |   | X | X | X | X |   |
| GLI3    | NM_000168    | 0  | 0  | -1 | 1  | X |   | X |   | X |   | X |   | X |   |
| GLYCTK  | NM_145262    | 0  | 0  | -1 | 0  |   | X | X |   | X |   | X |   | X |   |

|          |              |    |    |    |    |   |   |   |   |   |   |   |   |   |   |
|----------|--------------|----|----|----|----|---|---|---|---|---|---|---|---|---|---|
| GNAI3    | NM_006496    | -1 | 0  | 1  | -1 | X |   |   | X | X | X | X |   |   |   |
| GNB4     | NM_021629    | -1 | 1  | 1  | 1  | X |   | X | X | X |   | X |   |   |   |
| GOSR2    | NM_004287    | -1 | 0  | -1 | 1  | X |   |   | X | X | X | X |   |   |   |
| GPR85    | NM_018970    | -1 | -1 | 0  | 1  | X |   |   |   | X | X |   | X | X |   |
| GSTK1    | NM_015917    | -1 | -1 | -1 | 0  | X |   | X |   | X |   |   | X | X |   |
| GSTM2    | NM_000848    | -1 | -1 | 1  | 0  |   | X |   |   | X |   | X | X | X |   |
| GTF2IRD1 | NM_005685    | -1 | 0  | -1 | 0  | X |   | X |   | X | X |   | X |   |   |
| GTF2IRD2 | BC061590     | -1 | -1 | -1 | 1  |   | X | X |   | X |   |   | X | X |   |
| GTF2IRD2 | NM_173537    | 0  | -1 | -1 | 0  |   | X | X |   | X |   |   | X | X |   |
| GTPBP1   | NM_004286    | 0  | 0  | -1 | 0  |   |   | X | X |   | X | X |   | X |   |
| GTPBP2   | NM_019096    | -1 | 1  | 0  | -1 |   | X |   |   | X | X |   | X |   | X |
| H2AFJ    | NM_018267    | -1 | -1 | 0  | -1 |   |   | X |   | X | X | X |   |   | X |
| HEPACAM  | NM_152722    | 0  | 0  | -1 | 0  | X |   |   |   | X | X | X |   | X |   |
| HEPH     | NM_014799    | -1 | -1 | -1 | 1  |   |   |   | X | X | X | X |   | X |   |
| HFM1     | NM_001017975 | -1 | 0  | -1 | -1 |   | X |   |   | X | X | X | X |   |   |
| HIBADH   | NM_152740    | 1  | -1 | 0  | 0  |   | X |   | X |   | X |   | X | X |   |
| HIGD1A   | NM_014056    | 0  | -1 | 0  | 0  | X | X |   |   |   | X | X | X |   |   |
| HIST1H4H | NM_003543    | 0  | -1 | 0  | 1  |   | X |   | X | X | X |   | X |   |   |
| HLA-DPA1 | NM_033554    | 1  | -1 | 1  | 0  |   | X |   | X |   | X | X | X |   |   |
| HLA-DPB1 | NM_002121    | 1  | -1 | 1  | 0  | X | X |   | X | X |   |   | X |   |   |
| HSPBAP1  | NM_024610    | -1 | -1 | -1 | -1 | X |   | X |   | X |   | X |   | X |   |
| HYOU1    | NM_006389    | -1 | 0  | 1  | -1 |   |   | X |   | X | X | X | X | X |   |
| IFIT2    | NM_001547    | 0  | -1 | -1 | 0  |   |   | X | X | X | X |   |   | X |   |
| IFT122   | NM_018262    | 0  | 0  | -1 | 1  |   |   | X | X |   | X | X | X |   |   |
| IGFBP3   | NM_001013398 | -1 | -1 | 0  | 0  | X |   |   |   |   | X | X | X | X |   |
| JAKMIP2  | NM_014790    | 1  | -1 | 1  | -1 |   | X |   |   | X | X | X | X |   |   |
| KCTD13   | NM_178863    | -1 | 0  | 0  | -1 |   |   |   | X |   | X |   | X | X | X |
| KIAA0556 | NM_015202    | -1 | 0  | -1 | -1 | X |   |   |   | X | X |   | X | X |   |
| KIAA1407 | NM_020817    | -1 | 0  | -1 | -1 |   |   | X |   | X | X | X |   | X |   |
| KLC4     | NM_201523    | -1 | 0  | -1 | 0  | X |   | X |   |   |   | X | X | X |   |
| LAMC3    | NM_006059    | 0  | 1  | -1 | 1  |   |   | X | X |   | X |   |   | X | X |
| LDLR     | NM_000527    | -1 | 0  | -1 | -1 |   | X | X |   |   | X | X | X |   |   |
| LIF      | NM_002309    | 1  | 1  | -1 | 0  | X |   | X | X |   |   | X |   | X |   |
| LIF      | NM_002309    | 1  | 1  | -1 | 0  | X |   | X | X |   |   | X |   | X |   |
| LIMA1    | NM_016357    | -1 | -1 | 1  | 0  |   |   |   | X | X | X |   | X | X |   |
| LIPG     | NM_006033    | 1  | 1  | -1 | -1 | X | X |   |   |   | X | X | X |   |   |
| LMO7     | NM_005358    | 0  | 1  | -1 | 1  |   |   |   | X | X | X | X | X |   |   |
| LMX1B    | NM_002316    | 1  | 1  | -1 | 0  |   | X | X |   |   | X |   | X | X |   |
| LRP10    | NM_014045    | 1  | 0  | -1 | 1  |   |   | X |   | X | X |   | X | X |   |
| LYRM1    | NM_020424    | -1 | -1 | -1 | -1 | X | X |   | X |   |   |   | X | X |   |
| MAFG     | NM_002359    | -1 | 1  | -1 | -1 |   |   | X |   | X | X | X |   | X |   |
| MAGIX    | NM_024859    | 0  | -1 | 1  | 0  | X |   |   | X |   | X | X |   | X |   |
| MAP3K12  | NM_006301    | 0  | -1 | 0  | 0  |   |   |   |   | X | X | X | X | X |   |
| MAPK3    | NM_002746    | -1 | -1 | -1 | 0  |   | X | X |   | X |   |   | X | X |   |
| MBNL2    | NM_144778    | -1 | 0  | -1 | 0  |   | X |   | X | X | X |   | X |   |   |
| MCPH1    | NM_024596    | -1 | -1 | -1 | -1 |   |   |   | X | X | X | X |   | X |   |
| MDK      | NM_001012334 | -1 | 0  | -1 | 0  | X | X |   |   |   | X |   | X | X |   |
| MEGF8    | NM_001410    | -1 | 0  | -1 | 0  | X | X |   |   | X |   | X | X |   |   |
| MGST1    | NM_145791    | -1 | -1 | 1  | 0  |   | X |   |   | X | X |   | X | X |   |
| MID1IP1  | NM_021242    | -1 | 0  | -1 | 0  | X | X |   |   |   |   | X | X | X |   |
| MOCOS    | NM_017947    | -1 | 0  | 0  | 0  | X |   |   | X | X | X | X |   |   |   |
| MPP1     | NM_002436    | -1 | 0  | 1  | -1 |   |   |   |   | X | X | X | X | X |   |
| MPPE1    | NM_023075    | -1 | -1 | 1  | 0  |   | X |   |   | X | X | X | X |   |   |
| MREG     | NM_018000    | 1  | 0  | -1 | 1  |   |   | X |   | X | X | X | X |   |   |
| MREG     | NM_018000    | 1  | 0  | -1 | 1  |   |   | X |   | X | X | X | X |   |   |
| MSN      | NM_002444    | -1 | 1  | -1 | -1 | X | X |   | X |   |   |   | X | X |   |
| MTSS1    | NM_014751    | -1 | -1 | 1  | -1 | X |   |   | X | X | X | X |   |   |   |
| NAGPA    | NM_016256    | 0  | -1 | -1 | -1 |   | X |   |   | X | X | X |   | X |   |
| NAP1L3   | NM_004538    | 0  | -1 | 1  | -1 | X | X |   |   | X |   | X | X |   |   |
| NEK6     | NM_014397    | 1  | 0  | -1 | 1  | X | X |   | X | X |   |   |   | X |   |
| NFATC4   | NM_004554    | -1 | 0  | -1 | 1  | X |   | X | X |   | X | X |   |   |   |
| NFE2L3   | NM_004289    | 1  | 1  | -1 | 1  |   |   |   | X | X | X | X |   | X |   |
| NHS      | NM_198270    | 0  | -1 | 0  | 0  |   |   |   | X | X | X | X |   | X |   |
| NICN1    | NM_032316    | -1 | 0  | -1 | -1 |   |   | X |   | X | X | X |   | X |   |
| NOG      | NM_005450    | 1  | 0  | -1 | 1  |   | X |   |   |   | X | X | X | X |   |
| NOM1     | NM_138400    | 1  | 0  | -1 | 0  |   | X |   | X | X |   |   | X | X |   |

|          |              |    |    |    |    |   |   |   |   |   |   |   |   |   |   |
|----------|--------------|----|----|----|----|---|---|---|---|---|---|---|---|---|---|
| NT5DC1   | NM_152729    | -1 | -1 | 0  | 0  |   |   |   | X | X | X | X |   |   | X |
| NUAK2    | NM_030952    | 1  | 0  | -1 | 1  | X |   |   | X | X |   | X | X |   |   |
| ODF2L    | NM_020729    | -1 | 0  | 0  | 0  | X |   |   |   | X | X | X |   |   | X |
| ODZ3     | NM_001080477 | -1 | 0  | 0  | 1  | X | X |   | X | X | X |   |   |   |   |
| OSMR     | NM_003999    | 0  | 0  | -1 | 1  | X |   |   | X | X |   | X |   | X |   |
| OTUD5    | NM_017602    | 0  | 0  | -1 | 1  |   |   | X |   | X | X | X |   | X |   |
| PARVA    | NM_018222    | 0  | 1  | -1 | 0  | X | X |   |   | X |   | X | X |   |   |
| PCDH1    | NM_002587    | 0  | -1 | -1 | -1 | X | X | X |   |   |   |   | X | X | X |
| PDE1A    | NM_001003683 | -1 | 1  | -1 | 1  | X |   |   |   | X | X | X |   | X | X |
| PDE1A    | AL110263     | -1 | 0  | -1 | 1  | X |   |   |   | X | X | X |   | X |   |
| PDLIM2   | NM_021630    | 0  | 0  | -1 | 0  | X | X |   |   | X |   | X | X |   |   |
| PFN2     | NM_053024    | -1 | 0  | -1 | 1  |   | X | X |   |   | X |   | X | X |   |
| PHC1     | NM_004426    | -1 | -1 | -1 | 0  |   |   |   | X | X | X | X | X |   |   |
| PIGH     | NM_004569    | -1 | 1  | 1  | 0  |   | X | X |   |   | X |   | X |   | X |
| PISD     | NM_014338    | -1 | -1 | -1 | 1  |   |   | X | X | X |   | X |   | X |   |
| PLA1A    | NM_015900    | -1 | -1 | -1 | -1 |   |   | X | X | X | X | X |   |   |   |
| PLAC8    | NM_016619    | 0  | 0  | -1 | 1  |   | X |   | X | X |   | X | X |   |   |
| PLXND1   | NM_015103    | 1  | 1  | -1 | 0  | X | X |   |   |   | X |   | X | X |   |
| PNPO     | NM_018129    | -1 | -1 | -1 | -1 | X |   |   | X |   | X |   | X | X |   |
| POLR3E   | AB040885     | -1 | -1 | 0  | 0  | X | X |   |   |   | X |   | X | X |   |
| POMGNT1  | NM_017739    | -1 | -1 | -1 | 0  | X |   |   |   |   | X | X | X |   | X |
| POU5F1   | NM_002701    | 1  | -1 | 0  | 1  | X |   | X |   | X | X | X |   |   |   |
| POU5F1   | NM_002701    | 1  | -1 | 0  | 1  | X |   | X |   | X | X | X |   |   |   |
| POU6F1   | NM_002702    | -1 | 0  | 0  | 0  | X |   | X | X | X |   | X |   |   |   |
| PRMT2    | NM_206962    | -1 | 0  | -1 | 0  | X |   | X |   | X | X |   |   |   | X |
| PROM2    | NM_144707    | -1 | -1 | -1 | 0  | X |   | X | X |   |   |   | X | X |   |
| PSIP1    | NM_033222    | -1 | 1  | 0  | -1 |   | X |   | X | X | X |   | X |   |   |
| PSIP1    | NM_021144    | -1 | 0  | 0  | -1 |   | X |   | X | X | X |   | X |   |   |
| PURG     | NM_001015508 | -1 | 1  | 0  | 0  |   |   |   | X | X | X |   | X |   | X |
| PVRL2    | NM_002856    | 0  | 0  | -1 | 1  | X | X |   | X |   |   |   | X | X |   |
| PVRL2    | NM_001042724 | 0  | 0  | -1 | 0  | X | X |   | X |   |   |   | X | X |   |
| RAB43    | NM_198490    | -1 | 0  | -1 | -1 | X |   | X |   |   | X |   | X | X |   |
| RAB5B    | X54871       | -1 | -1 | 0  | -1 | X |   | X |   |   | X | X | X |   |   |
| RAB7L1   | NM_003929    | 1  | 0  | -1 | -1 | X |   | X | X | X |   | X |   |   |   |
| RABGAP1  | AK022408     | -1 | 0  | 0  | 1  |   | X | X |   |   | X | X | X |   |   |
| RALA     | NM_005402    | -1 | 0  | 1  | -1 | X |   |   | X | X | X |   |   | X |   |
| RALGPS2  | NM_018037    | 0  | -1 | 1  | -1 | X |   |   | X | X | X |   |   |   |   |
| RBKS     | NM_022128    | 0  | -1 | -1 | -1 | X | X |   |   | X |   | X | X |   |   |
| RERE     | NM_012102    | 0  | -1 | -1 | 0  | X |   | X |   | X | X | X |   |   |   |
| RFNG     | NM_002917    | -1 | 0  | -1 | -1 | X | X |   |   | X |   |   | X | X |   |
| RFTN2    | NM_144629    | -1 | 1  | -1 | 1  |   | X |   | X | X |   | X | X |   |   |
| RHBDF1   | NM_022450    | -1 | 1  | -1 | 1  | X |   | X |   | X |   | X | X |   |   |
| RNF175   | NM_173662    | -1 | 0  | 0  | 0  |   | X | X |   | X | X |   | X |   |   |
| RNF185   | NM_152267    | -1 | -1 | 0  | -1 |   | X | X |   | X |   |   | X | X |   |
| RNF32    | NM_030936    | -1 | -1 | 0  | -1 | X |   | X |   | X | X | X |   |   |   |
| RPL22    | NM_000983    | 0  | -1 | -1 | 0  | X | X |   |   | X |   |   | X | X |   |
| SEC14L2  | NM_012429    | 0  | 0  | -1 | 0  | X |   | X |   | X | X |   | X |   |   |
| SEMA4B   | NM_020210    | 1  | -1 | -1 | 0  | X |   | X | X |   |   | X | X |   |   |
| SEN2     | NM_021627    | -1 | 0  | 1  | 1  |   | X | X |   | X | X |   | X |   |   |
| SEN2     | NM_020654    | -1 | 0  | 0  | 0  |   | X |   | X |   | X | X | X | X |   |
| SEPHS2   | NM_012248    | -1 | 1  | 1  | -1 |   | X |   |   | X | X | X | X | X |   |
| SFXN2    | NM_178858    | 0  | -1 | 0  | 1  | X |   |   | X | X | X | X | X |   |   |
| SH3BP4   | NM_014521    | 1  | 1  | -1 | -1 | X |   | X |   | X | X |   |   |   | X |
| SIRT5    | NM_012241    | -1 | 0  | -1 | -1 |   | X |   | X | X |   | X | X |   |   |
| SIRT5    | NM_031244    | -1 | 0  | -1 | 0  |   | X |   | X | X |   | X | X |   |   |
| SKI      | NM_003036    | 1  | 0  | -1 | 1  | X |   | X |   | X | X |   |   | X |   |
| SLC19A1  | NM_194255    | 1  | 0  | -1 | -1 |   |   |   | X | X | X | X |   | X |   |
| SLC20A1  | NM_005415    | 1  | 1  | -1 | -1 | X | X |   |   |   |   | X | X |   | X |
| SLC25A20 | NM_000387    | -1 | -1 | 0  | -1 | X | X |   |   | X |   | X | X |   |   |
| SLC25A43 | NM_145305    | -1 | -1 | -1 | 0  | X |   |   | X | X | X | X |   |   |   |
| SLC36A1  | NM_078483    | -1 | 0  | 0  | -1 | X |   | X |   | X | X | X |   |   |   |
| SLC37A1  | NM_018964    | 1  | -1 | 0  | 0  | X | X |   |   |   |   | X | X | X |   |
| SLC39A11 | NM_139177    | -1 | 0  | -1 | 0  |   |   | X |   | X | X | X | X |   |   |
| SLC40A1  | NM_014585    | -1 | -1 | 1  | 0  | X | X |   |   | X |   |   | X | X |   |
| SLC44A2  | NM_020428    | 0  | 1  | -1 | 1  | X |   | X |   | X |   |   | X | X |   |
| SLC6A19  | AK096054     | 1  | 1  | -1 | -1 | X |   | X | X |   |   | X |   | X |   |



|           |              |    |    |    |    |   |   |   |   |   |   |   |   |   |   |
|-----------|--------------|----|----|----|----|---|---|---|---|---|---|---|---|---|---|
| SLC7A8    | NM_182728    | 0  | -1 | 1  | 0  | X |   |   |   | X | X |   | X | X |   |
| SLC9A8    | NM_015266    | -1 | 0  | 0  | 0  | X |   | X | X | X | X |   |   |   |   |
| SLCO3A1   | XM_001132480 | 1  | -1 | -1 | -1 | X |   |   | X | X |   | X |   | X |   |
| SLCO3A1   | NM_013272    | 0  | -1 | -1 | 0  | X |   |   | X | X |   | X |   | X |   |
| SMAD3     | U68019       | 1  | 0  | -1 | 0  |   |   | X |   | X | X | X |   | X |   |
| SMAD3     | NM_005902    | 0  | -1 | -1 | 0  |   |   | X |   | X | X | X |   | X |   |
| SMARCA2   | NM_139045    | -1 | -1 | 0  | 0  |   |   |   |   | X | X | X | X | X |   |
| SORBS3    | NM_005775    | -1 | -1 | -1 | 0  | X |   | X |   |   | X |   |   | X | X |
| SPARC     | NM_003118    | -1 | 1  | 0  | 0  | X |   |   |   | X |   | X | X | X |   |
| SPOCK1    | NM_004598    | 1  | -1 | -1 | 1  | X |   |   | X | X | X |   | X |   |   |
| SPRED2    | NM_181784    | 1  | 1  | -1 | 0  |   |   | X |   | X | X | X |   | X |   |
| SPTBN4    | NM_020971    | -1 | -1 | 1  | 0  | X |   | X | X |   |   | X |   | X |   |
| SSH3      | NM_017857    | 0  | -1 | -1 | 0  | X |   | X | X | X | X |   |   |   |   |
| ST6GAL1   | NM_173216    | 1  | 0  | -1 | -1 |   |   | X |   | X | X | X | X |   |   |
| STAMBPL1  | NM_020799    | -1 | 0  | -1 | -1 |   | X |   |   | X | X |   | X | X |   |
| STMN1     | NM_203401    | -1 | 1  | 0  | 1  |   | X |   |   | X | X | X | X |   |   |
| STMN3     | NM_015894    | -1 | 0  | -1 | 1  | X | X | X |   |   | X | X |   |   |   |
| STRA6     | NM_022369    | 0  | 1  | -1 | 0  | X | X | X |   |   |   | X | X |   |   |
| STX12     | NM_177424    | -1 | -1 | 0  | 0  |   |   |   | X | X | X | X |   |   | X |
| STXBP1    | NM_003165    | 0  | 0  | -1 | -1 |   | X |   |   | X |   | X | X | X |   |
| SUPT4H1   | NM_003168    | -1 | 1  | 0  | 0  |   | X | X |   | X |   | X | X |   |   |
| SYNGR2    | NM_004710    | 1  | 0  | -1 | 0  |   |   |   | X | X | X | X |   | X |   |
| SYNJ2     | NM_003898    | 1  | 0  | -1 | 0  | X |   |   | X | X | X |   | X |   |   |
| TAOK2     | NM_004783    | -1 | 1  | -1 | 0  | X | X |   |   | X |   | X | X |   |   |
| TATDN3    | NM_001042552 | -1 | -1 | 0  | -1 |   |   |   | X | X | X | X |   | X |   |
| TBC1D9    | NM_015130    | 1  | -1 | 1  | -1 |   | X |   |   | X | X | X | X |   |   |
| TCF7L1    | NM_031283    | -1 | -1 | -1 | 0  |   | X |   |   | X | X |   | X | X |   |
| TES       | NM_152829    | -1 | 0  | 0  | -1 |   |   | X | X | X | X |   |   | X |   |
| TFE3      | NM_006521    | -1 | 0  | -1 | 0  | X |   |   |   | X |   | X | X | X |   |
| TGFBR3    | NM_003243    | 1  | 1  | -1 | 0  |   | X |   | X | X | X |   | X |   |   |
| THBS2     | L12350       | 0  | -1 | -1 | 0  | X | X |   |   | X | X |   | X |   |   |
| THRA      | NM_003250    | -1 | 0  | 0  | 1  |   |   | X | X | X |   | X |   | X |   |
| THRA      | NM_199334    | -1 | -1 | 0  | 0  |   |   | X | X | X |   | X |   | X |   |
| TMC6      | NM_007267    | 1  | 0  | -1 | 0  | X | X |   |   |   | X | X | X |   |   |
| TMCC1     | NM_001017395 | -1 | 1  | -1 | -1 | X |   |   |   | X | X | X |   | X |   |
| TMCO1     | NM_019026    | -1 | 0  | 0  | 0  | X | X |   | X | X |   |   | X |   |   |
| TMEM106A  | NM_145041    | -1 | -1 | -1 | 0  | X |   |   |   | X | X | X | X |   |   |
| TMEM159   | NM_020422    | -1 | -1 | -1 | 0  | X | X |   |   | X | X |   | X |   |   |
| TMEM182   | NM_144632    | -1 | -1 | 1  | -1 |   |   |   | X | X | X | X |   |   | X |
| TMTC4     | NM_032813    | 0  | 0  | -1 | 0  |   | X |   |   | X | X |   | X | X |   |
| TNFRSF10B | NM_003842    | 0  | 0  | -1 | 0  | X | X |   |   |   | X |   | X | X |   |
| TOMM20    | NM_014765    | -1 | -1 | -1 | 0  |   | X |   |   | X | X | X | X |   |   |
| TPCN1     | NM_017901    | 0  | 0  | -1 | -1 | X |   | X |   | X |   | X |   | X |   |
| TPCN1     | AB032995     | 0  | 0  | -1 | -1 | X |   | X |   | X |   | X |   | X |   |
| TPP1      | NM_000391    | -1 | -1 | -1 | 0  | X |   | X |   | X | X | X |   |   |   |
| TRIB2     | NM_021643    | 0  | 1  | -1 | 0  |   | X | X |   |   | X | X | X |   |   |
| TRIM26    | NM_003449    | -1 | 0  | 1  | 1  |   | X |   |   | X |   | X | X | X |   |
| TRIM37    | NM_001005207 | -1 | 0  | 0  | 0  | X |   |   | X | X | X | X |   |   |   |
| TRIM44    | NM_017583    | -1 | 0  | -1 | 0  |   | X |   |   | X | X | X | X |   |   |
| TRIM46    | NM_025058    | 1  | -1 | 0  | 1  | X |   | X |   | X | X |   |   | X |   |
| TRIM46    | BC069416     | 0  | -1 | -1 | -1 | X |   | X |   | X | X |   |   | X |   |
| TTL1      | NM_001008572 | -1 | 0  | -1 | -1 |   |   | X |   | X |   | X |   | X | X |
| TYSND1    | NM_173555    | 1  | 0  | -1 | 0  | X |   |   | X | X | X | X |   |   |   |
| UBE2Q2    | NM_173469    | 0  | -1 | 0  | 1  | X |   |   |   | X | X | X |   | X |   |
| UBE3B     | NM_183415    | -1 | -1 | -1 | -1 | X |   | X | X | X |   | X |   |   |   |
| UNG       | NM_003362    | 0  | -1 | -1 | 0  |   | X |   | X |   | X |   | X | X |   |
| USP30     | AL834278     | -1 | 0  | -1 | 0  | X |   |   |   | X | X | X | X |   |   |
| USP30     | NM_032663    | -1 | 0  | 1  | 0  | X |   |   |   | X | X | X | X |   |   |
| USP40     | NM_018218    | -1 | 0  | -1 | -1 | X | X | X |   | X |   | X |   |   |   |
| VAV3      | NM_006113    | 1  | -1 | 1  | 0  |   |   | X |   | X | X | X | X |   |   |
| WARS2     | NM_201263    | 0  | -1 | -1 | -1 | X |   |   | X | X | X | X |   |   |   |
| WDFY2     | NM_052950    | 1  | -1 | -1 | -1 |   | X | X | X | X |   | X |   |   |   |
| WDR5B     | NM_019069    | -1 | -1 | 1  | 0  |   | X |   | X | X | X |   | X |   |   |
| WWC3      | NM_015691    | -1 | -1 | 1  | 0  | X |   |   | X | X |   | X |   | X |   |
| WWTR1     | NM_015472    | 0  | 1  | -1 | 1  |   |   | X |   | X | X | X | X |   | X |
| WWTR1     | AL050107     | -1 | 0  | -1 | 1  |   |   | X |   | X | X | X | X |   | X |

|          |              |    |    |    |    |   |   |   |   |   |   |   |   |   |   |
|----------|--------------|----|----|----|----|---|---|---|---|---|---|---|---|---|---|
| WWTR1    | NM_015472    | 0  | 1  | -1 | 1  |   |   | X |   | X | X | X |   | X |   |
| XYLB     | NM_005108    | 0  | -1 | -1 | 0  |   |   | X | X | X | X | X |   |   |   |
| ZAK      | NM_133646    | -1 | -1 | 0  | 0  |   |   | X |   |   | X | X | X | X |   |
| ZBTB22   | NM_005453    | 0  | 0  | -1 | 0  |   |   | X | X |   | X | X | X |   |   |
| ZMAT1    | NM_032441    | -1 | 0  | 0  | -1 | X |   |   | X | X |   | X |   |   | X |
| ZNF346   | NM_012279    | -1 | 0  | 0  | 0  |   | X | X |   |   |   | X | X |   | X |
| ZNF395   | NM_018660    | 0  | 0  | -1 | -1 |   | X | X |   |   | X |   | X | X |   |
| ZNF512   | NM_032434    | 1  | 0  | -1 | 0  |   |   | X |   |   | X | X | X | X |   |
| ZNF711   | NM_021998    | -1 | 1  | 1  | 0  |   | X |   |   | X | X |   |   | X | X |
| ZNRF1    | NM_032268    | 0  | 0  | -1 | 0  | X |   | X | X | X |   | X |   |   |   |
| ABL1     | NM_005157    | -1 | 0  | -1 | 0  |   |   |   | X | X | X | X |   |   |   |
| ACTG2    | NM_001615    | 1  | -1 | 0  | 0  | X |   | X |   |   |   |   | X | X |   |
| ADARB2   | NM_018702    | -1 | 0  | -1 | 1  |   |   | X |   |   |   | X | X | X |   |
| ADK      | NM_001123    | 0  | -1 | 1  | -1 | X |   |   | X | X |   |   |   |   | X |
| ADPRH    | NM_001125    | 1  | 0  | -1 | 0  |   |   | X |   |   | X | X |   |   | X |
| ADRA1D   | NM_000678    | -1 | -1 | -1 | -1 | X | X |   |   |   | X |   | X |   |   |
| AGRN     | NM_198576    | 1  | 0  | -1 | 1  | X |   |   |   | X |   | X |   |   | X |
| AGRN     | NM_198576    | 1  | 0  | -1 | 1  | X |   |   |   | X |   | X |   |   | X |
| ANAPC7   | NM_016238    | 0  | -1 | -1 | 1  | X |   | X |   |   |   |   | X | X |   |
| AP2A2    | NM_012305    | 0  | 0  | -1 | 0  |   | X |   |   | X |   | X |   | X |   |
| AP4S1    | NM_007077    | 0  | 0  | -1 | 0  | X |   |   |   | X | X |   | X |   |   |
| APP      | NM_000484    | -1 | 0  | -1 | 0  |   |   |   |   | X | X | X | X |   |   |
| ARAF     | NM_001654    | -1 | -1 | -1 | 0  | X |   |   | X |   | X |   |   |   | X |
| ARF6     | NM_001663    | 1  | 1  | -1 | 1  | X |   |   |   | X | X | X |   |   |   |
| ATP6V1B1 | NM_001692    | -1 | -1 | 1  | 0  | X |   | X |   |   |   | X |   |   | X |
| B4GALT2  | NM_003780    | 0  | 0  | -1 | 0  |   |   | X |   |   | X | X | X |   |   |
| B4GALT2  | BC002431     | 0  | 0  | -1 | 0  |   |   | X |   |   | X | X | X |   |   |
| BATF2    | NM_138456    | 1  | 0  | 0  | -1 | X |   |   |   | X |   |   |   | X | X |
| BBS1     | NM_024649    | -1 | 0  | -1 | 0  |   | X | X |   |   | X |   |   | X |   |
| BDH2     | NM_020139    | -1 | 0  | 1  | 1  |   | X |   |   |   | X |   | X | X |   |
| BEST1    | NM_004183    | -1 | 1  | 1  | 0  | X |   |   |   | X |   | X | X |   |   |
| BOC      | NM_033254    | 0  | -1 | 0  | -1 | X |   | X |   |   | X |   | X |   |   |
| C10orf76 | NM_024541    | 0  | 0  | -1 | -1 |   |   |   |   | X |   | X | X |   | X |
| C11orf49 | NM_001003676 | -1 | 0  | -1 | 0  | X |   | X |   |   |   | X |   |   | X |
| C12orf36 | NM_182558    | -1 | -1 | -1 | -1 | X |   | X | X |   | X |   |   |   |   |
| C1orf145 | BC027909     | -1 | 0  | -1 | 0  |   |   | X | X | X | X |   |   |   |   |
| C1QTNF1  | NM_198594    | 0  | -1 | -1 | 1  |   |   | X |   | X |   |   | X |   | X |
| C5       | NM_001735    | 0  | 0  | -1 | 0  |   |   |   |   |   |   | X | X | X | X |
| C5orf38  | NM_178569    | -1 | -1 | -1 | -1 |   |   | X |   | X |   | X |   | X | X |
| C8orf44  | NM_019607    | -1 | 0  | 0  | -1 | X |   |   |   | X |   | X | X |   |   |
| CADPS    | NM_183393    | -1 | -1 | 0  | 0  | X |   |   |   | X | X | X |   |   |   |
| CALCOCO1 | NM_020898    | -1 | -1 | 1  | 0  | X |   |   |   | X |   | X |   | X |   |
| CAND2    | NM_012298    | 0  | 1  | -1 | 1  | X |   | X |   |   | X |   |   |   | X |
| CANT1    | NM_138793    | -1 | 0  | -1 | -1 |   | X | X | X |   |   |   |   |   | X |
| CASP1    | NM_033292    | 1  | -1 | 0  | 1  |   |   | X |   |   | X |   |   | X | X |
| CCDC120  | NM_033626    | 0  | -1 | -1 | -1 |   |   | X | X | X |   |   |   | X |   |
| CCDC121  | NM_024584    | -1 | -1 | 1  | 0  | X |   |   |   | X | X | X |   |   |   |
| CCDC69   | NM_015621    | -1 | -1 | 1  | 0  | X |   | X |   |   |   |   | X |   | X |
| CD151    | NM_004357    | 0  | 0  | -1 | 0  | X |   | X |   |   |   | X |   | X |   |
| CDKL3    | NM_016508    | -1 | 0  | -1 | -1 |   |   |   |   | X | X |   | X |   | X |
| CEP164   | NM_014956    | -1 | 0  | -1 | 0  | X |   | X |   |   | X |   |   |   | X |
| CEP290   | NM_025114    | -1 | -1 | 0  | -1 |   | X |   | X | X |   |   | X |   |   |
| CKMT1B   | AK094322     | 0  | -1 | 1  | 1  |   |   | X |   | X | X | X | X |   |   |
| CLEC2D   | NM_001004419 | -1 | -1 | 0  | 0  |   |   |   |   | X | X |   | X |   | X |
| CMTM7    | NM_138410    | 0  | 1  | -1 | 0  | X |   |   |   |   | X | X |   | X |   |
| CNNM2    | NM_017649    | 1  | -1 | 0  | 1  |   |   | X | X | X | X |   |   |   |   |
| COL4A5   | NM_033380    | -1 | 0  | -1 | 0  |   |   | X | X | X |   |   |   |   | X |
| COPZ2    | NM_016429    | -1 | 0  | 0  | -1 | X | X |   |   |   | X |   | X |   |   |
| CREG1    | NM_003851    | 0  | -1 | 1  | 1  |   |   |   |   | X | X | X |   |   | X |
| CTNNBIP1 | NM_020248    | -1 | 0  | -1 | 0  |   |   |   |   | X | X | X |   | X |   |
| CTSD     | NM_001909    | -1 | -1 | -1 | -1 |   |   |   |   | X |   |   | X | X | X |
| CYB5R1   | NM_016243    | -1 | 0  | 0  | 0  |   |   | X |   | X |   |   | X | X |   |
| CYFIP2   | NM_001037332 | 0  | -1 | 1  | 0  |   |   | X |   | X | X |   | X |   |   |
| DENND1A  | NM_020946    | 0  | 0  | -1 | 0  |   | X |   |   |   | X | X | X |   |   |
| DEPDC4   | AK090824     | -1 | 0  | 0  | -1 |   | X |   |   | X |   | X | X |   |   |
| DHRS4    | NM_021004    | -1 | 0  | -1 | 0  |   |   | X |   | X | X |   | X |   |   |

|           |              |    |    |    |    |   |   |   |   |   |   |   |   |   |   |
|-----------|--------------|----|----|----|----|---|---|---|---|---|---|---|---|---|---|
| DIAPH3    | NM_030932    | -1 | 1  | 1  | 1  |   |   |   |   | X | X | X |   | X |   |
| DLGAP4    | NM_014902    | -1 | 0  | 0  | -1 |   |   |   |   | X | X | X | X |   |   |
| DTWD2     | NM_173666    | -1 | -1 | 1  | -1 |   |   |   | X | X | X |   |   | X |   |
| DTX3L     | NM_138287    | 0  | 0  | -1 | -1 |   |   |   | X | X | X | X |   |   |   |
| DUSP18    | NM_152511    | -1 | 1  | 1  | -1 | X |   | X |   | X |   |   |   | X |   |
| DVL3      | NM_004423    | -1 | 0  | -1 | 0  |   |   | X | X |   |   |   |   | X | X |
| DYM       | NM_017653    | -1 | -1 | 1  | -1 | X |   | X |   |   |   |   | X |   | X |
| EEF2K     | NM_013302    | 0  | -1 | -1 | 1  | X |   |   |   | X | X | X | X |   |   |
| EFHA2     | NM_181723    | -1 | -1 | -1 | -1 |   | X |   |   | X | X | X |   |   |   |
| EFHD2     | NM_024329    | 1  | 1  | -1 | 0  | X |   | X |   |   |   | X |   |   | X |
| EHD2      | NM_014601    | 1  | 1  | -1 | -1 |   |   |   |   |   |   | X |   | X | X |
| EMP1      | NM_001423    | 1  | 1  | -1 | -1 |   |   |   | X |   |   |   | X | X | X |
| EPDR1     | NM_017549    | -1 | 0  | -1 | 1  |   | X |   |   | X |   |   | X | X |   |
| ERAL1     | NM_005702    | 0  | 0  | -1 | 0  | X |   | X |   | X | X |   |   |   |   |
| ERF       | NM_006494    | 1  | 0  | -1 | 1  | X |   | X |   |   |   |   | X |   | X |
| F8        | NM_019863    | -1 | -1 | 0  | 1  | X |   |   |   | X | X |   |   |   | X |
| FAM107A   | NM_007177    | -1 | -1 | 1  | 0  |   | X |   |   |   |   | X |   | X | X |
| FAM82B    | NM_016033    | -1 | -1 | 0  | -1 | X |   |   | X | X | X |   |   |   |   |
| FBXL14    | NM_152441    | -1 | -1 | -1 | -1 |   |   | X |   |   |   | X | X |   | X |
| FBXO44    | NM_001014765 | 0  | -1 | -1 | 0  |   |   |   | X | X | X |   |   |   | X |
| FCF1      | NM_015962    | -1 | 0  | -1 | -1 | X |   |   | X |   |   |   | X | X |   |
| FGD3      | NM_033086    | -1 | -1 | -1 | 0  |   |   | X |   |   |   |   | X | X |   |
| FGFR1     | NM_023111    | -1 | -1 | 0  | 1  | X | X |   |   | X | X |   |   |   |   |
| FGFR1     | NM_023110    | -1 | -1 | 0  | 1  | X | X |   |   | X | X |   |   |   |   |
| FGFR1     | AK024388     | -1 | -1 | 0  | -1 | X | X |   |   | X | X |   |   |   |   |
| FIGF      | NM_004469    | -1 | -1 | 0  | -1 |   | X | X | X |   |   |   |   | X |   |
| FLOT1     | NM_005803    | -1 | 0  | -1 | -1 | X | X |   |   |   |   |   |   | X | X |
| FRAT1     | NM_005479    | 1  | -1 | 1  | 1  | X | X |   |   | X |   |   |   |   | X |
| FUCA2     | NM_032020    | -1 | -1 | -1 | 0  |   | X |   |   | X |   |   | X | X |   |
| G6PC2     | NM_021176    | -1 | -1 | -1 | -1 | X |   | X |   | X |   |   | X |   |   |
| GABARAPL1 | NM_031412    | 0  | 1  | -1 | 1  | X |   |   |   | X |   |   |   | X | X |
| GABRP     | NM_014211    | 0  | -1 | -1 | -1 |   |   | X | X | X | X |   |   |   |   |
| GALC      | NM_000153    | -1 | 0  | -1 | 1  | X |   |   | X | X |   |   | X |   |   |
| GARNL3    | NM_032293    | -1 | 0  | -1 | 0  | X |   |   |   |   |   | X | X | X |   |
| GATA5     | NM_080473    | -1 | 0  | -1 | -1 |   |   | X |   | X |   |   | X |   | X |
| GNAO1     | NM_138736    | 0  | 0  | -1 | -1 |   |   | X | X |   |   |   | X |   | X |
| GNB1      | NM_002074    | -1 | 0  | -1 | 0  |   | X |   |   | X |   |   | X | X |   |
| GPR108    | NM_020171    | -1 | -1 | 0  | -1 | X |   | X | X |   |   | X |   |   |   |
| GPR132    | NM_013345    | 0  | 0  | -1 | 0  |   |   | X | X |   |   |   | X | X |   |
| GPR137B   | NM_003272    | 1  | -1 | 0  | -1 |   |   |   |   | X | X | X |   |   | X |
| GSTM3     | NM_000849    | 0  | -1 | 1  | 0  |   | X |   | X | X |   |   |   | X |   |
| GSTO2     | NM_183239    | -1 | 0  | -1 | 1  | X |   |   | X | X |   |   |   |   | X |
| GUCY1A2   | NM_000855    | 1  | 1  | -1 | 1  |   |   |   | X | X | X | X |   |   |   |
| HDAC11    | NM_024827    | -1 | -1 | 0  | 0  | X |   |   |   | X | X |   |   |   | X |
| HDCC2     | NM_016063    | -1 | -1 | 0  | -1 | X |   | X | X | X |   |   |   |   |   |
| HPS1      | NM_000195    | -1 | -1 | -1 | -1 |   |   | X |   | X |   |   |   | X | X |
| HRH1      | NM_000861    | 0  | -1 | -1 | -1 | X |   |   |   | X | X | X |   |   |   |
| IDH1      | NM_005896    | -1 | -1 | 1  | 0  |   | X |   | X |   |   |   |   | X | X |
| IER3IP1   | NM_016097    | -1 | -1 | 1  | 0  |   | X |   | X | X |   |   |   | X |   |
| IL17D     | NM_138284    | 0  | -1 | 1  | -1 | X | X |   |   |   |   | X |   | X |   |
| IL7       | NM_000880    | 1  | 0  | 0  | -1 | X |   |   |   | X |   |   | X |   | X |
| INPP5B    | NM_005540    | -1 | -1 | 0  | 0  |   | X | X |   |   |   |   | X | X |   |
| IQCE      | AB028946     | 0  | -1 | -1 | 0  | X | X |   |   |   |   |   | X |   | X |
| IQCK      | NM_153208    | -1 | 0  | 0  | -1 |   |   |   | X | X | X | X |   |   |   |
| IRAK2     | NM_001570    | 0  | 1  | -1 | 0  |   |   | X | X | X |   |   |   |   | X |
| IRS2      | NM_003749    | 0  | -1 | 0  | 0  |   |   | X |   | X |   |   | X |   | X |
| ISYNA1    | NM_016368    | 0  | 0  | -1 | 1  | X |   |   |   |   |   | X | X |   | X |
| ITGA3     | NM_002204    | 0  | -1 | -1 | -1 | X |   | X |   | X |   |   | X |   |   |
| ITGB2     | NM_000211    | 1  | 0  | -1 | 1  |   |   | X | X | X |   |   |   | X |   |
| KAZALD1   | NM_030929    | 0  | -1 | -1 | 0  |   |   | X |   | X |   |   | X | X |   |
| KLHDC7B   | NM_138433    | -1 | 0  | -1 | 0  |   | X |   |   | X | X |   |   | X |   |
| KLHL13    | NM_033495    | 0  | -1 | 0  | 1  |   |   | X | X | X |   |   |   |   | X |
| KLHL20    | NM_014458    | -1 | 0  | 1  | -1 |   |   |   |   | X |   |   | X | X | X |
| KLRG1     | NM_005810    | 0  | -1 | 0  | 0  |   | X |   |   |   |   | X |   | X | X |
| KLRG2     | BC110858     | 1  | -1 | 0  | 0  | X |   |   | X | X |   |   |   | X |   |
| KREMEN1   | NM_153379    | -1 | 1  | 0  | 1  |   |   | X |   | X | X | X | X |   |   |

|          |              |    |    |    |    |   |   |   |   |   |   |   |   |   |   |
|----------|--------------|----|----|----|----|---|---|---|---|---|---|---|---|---|---|
| LAMB1    | NM_002291    | 0  | -1 | -1 | 0  |   |   |   |   | X | X | X | X |   |   |
| LDLRAD3  | NM_174902    | 0  | -1 | -1 | 0  |   |   | X |   |   | X | X | X |   |   |
| LIMD2    | NM_030576    | -1 | 0  | -1 | 0  | X | X |   |   |   |   | X |   | X |   |
| LITAF    | NM_004862    | -1 | -1 | -1 | -1 | X |   | X |   | X |   |   |   |   | X |
| LPIN2    | NM_014646    | -1 | -1 | 1  | 0  |   |   |   | X | X | X | X |   |   |   |
| LRP5     | NM_002335    | 0  | 0  | -1 | 1  |   |   | X |   |   |   | X | X | X |   |
| LRRC17   | NM_005824    | -1 | -1 | 0  | 0  |   |   |   | X | X | X |   |   | X |   |
| LRRC27   | NM_030626    | -1 | 0  | -1 | 0  |   |   | X |   | X | X | X |   |   |   |
| LRRC37A3 | NM_199340    | -1 | 0  | -1 | 0  |   | X |   |   | X |   | X | X |   |   |
| LRRC39   | NM_144620    | -1 | 0  | 0  | 0  |   |   |   |   | X | X |   | X |   | X |
| LRRC46   | NM_033413    | -1 | 0  | 1  | 1  |   |   |   |   | X | X | X |   | X |   |
| LSS      | NM_001001438 | -1 | 1  | -1 | -1 | X |   |   | X | X | X |   |   |   |   |
| LTBP4    | NM_003573    | 0  | -1 | -1 | -1 | X |   |   | X |   |   | X |   | X |   |
| LYSMD1   | NM_212551    | 0  | 0  | -1 | -1 | X |   |   |   | X |   | X |   |   | X |
| LZTS2    | NM_032429    | 1  | -1 | -1 | 1  |   | X |   |   | X | X |   | X |   |   |
| M6PR     | NM_002355    | 0  | -1 | 0  | 0  | X |   |   | X | X | X |   |   |   |   |
| MACF1    | NM_012090    | -1 | 0  | -1 | 0  |   |   |   |   | X | X | X | X |   |   |
| MBTD1    | NM_017643    | -1 | 0  | 0  | 0  |   |   |   | X | X | X | X |   |   |   |
| MCF2     | NM_005369    | -1 | 0  | 1  | 1  | X |   |   |   | X | X |   |   | X |   |
| MCM2     | NM_004526    | 0  | 1  | -1 | 1  |   | X |   |   |   |   | X | X | X |   |
| MESDC1   | NM_022566    | 0  | 1  | -1 | 0  |   |   | X | X |   | X |   |   | X |   |
| MKNK2    | NM_017572    | -1 | -1 | -1 | -1 | X |   |   | X |   | X |   |   | X |   |
| MKS1     | NM_017777    | -1 | 0  | -1 | -1 |   |   | X |   | X | X | X |   |   |   |
| MKS1     | AK000352     | -1 | 0  | -1 | -1 |   |   | X |   | X | X | X |   |   |   |
| MLPH     | NM_024101    | 0  | -1 | 0  | 0  | X |   |   |   | X |   | X | X |   |   |
| MLX      | NM_170607    | -1 | 0  | -1 | 0  |   |   |   |   | X | X |   | X | X |   |
| MOV10L1  | NM_018995    | -1 | 1  | 1  | -1 |   |   | X | X | X |   |   |   | X |   |
| MRPL43   | NM_176794    | -1 | -1 | 0  | -1 | X | X |   |   |   |   | X | X |   |   |
| MRPL43   | NM_176792    | -1 | 1  | -1 | 0  | X | X |   |   |   |   | X | X |   |   |
| MRRF     | NM_199177    | 0  | -1 | -1 | 0  | X |   |   |   |   | X | X | X |   |   |
| MRRF     | NM_138777    | 0  | -1 | -1 | 0  | X |   |   |   |   | X | X | X |   |   |
| MTERFD2  | NM_182501    | -1 | -1 | 1  | -1 |   |   | X |   | X | X | X |   |   |   |
| MXRA7    | NM_001008528 | -1 | 1  | -1 | 0  | X |   | X | X |   | X |   |   |   |   |
| MXRA7    | NM_001008529 | -1 | 0  | -1 | 0  | X |   | X | X |   | X |   |   |   |   |
| MXRA7    | NM_001008528 | -1 | 1  | -1 | 0  | X |   | X | X |   | X |   |   |   |   |
| MYD88    | NM_002468    | 0  | 0  | -1 | 0  | X | X | X |   | X |   |   |   |   |   |
| MYO7A    | NM_000260    | 1  | -1 | -1 | 0  |   |   | X | X |   |   |   | X | X |   |
| NDRG1    | NM_006096    | 1  | -1 | 0  | -1 |   |   |   | X | X | X | X |   |   |   |
| NDRG2    | NM_201535    | -1 | 0  | -1 | 0  |   |   | X |   |   | X | X | X |   |   |
| NEUROG1  | NM_006161    | -1 | 0  | -1 | -1 |   | X |   |   | X | X |   | X |   |   |
| NISCH    | NM_007184    | 0  | 0  | -1 | 0  |   | X |   |   | X |   | X | X |   |   |
| NPC1     | NM_000271    | 1  | 0  | 1  | -1 |   |   |   |   | X | X | X |   | X |   |
| NPLOC4   | AB040932     | -1 | 1  | 0  | -1 |   |   |   | X | X | X |   |   | X |   |
| OSBP2    | NM_030758    | -1 | -1 | 1  | 1  | X |   |   | X | X |   |   | X |   |   |
| OSBPL5   | NM_020896    | -1 | 0  | -1 | -1 | X |   | X |   |   |   | X |   | X |   |
| PACS1    | NM_018026    | 0  | 0  | -1 | 1  | X |   | X |   |   |   | X |   | X |   |
| PARD3    | AF196185     | -1 | 0  | -1 | 0  | X |   | X |   | X |   |   |   |   | X |
| PCBD2    | NM_032151    | -1 | -1 | 0  | -1 |   | X |   | X | X |   |   | X |   |   |
| PCBP4    | NM_033010    | 0  | 0  | -1 | 0  |   |   | X |   |   | X | X |   | X |   |
| PFKFB2   | NM_001018053 | -1 | 1  | 1  | -1 |   |   |   | X |   | X | X | X |   |   |
| PFN4     | NM_199346    | -1 | 0  | 0  | 0  |   |   |   |   | X |   | X |   | X | X |
| PGAM5    | NM_138575    | 0  | 0  | -1 | 1  |   |   |   |   | X |   | X | X | X |   |
| PHF19    | NM_015651    | 0  | 1  | -1 | 0  | X |   | X |   |   | X |   | X |   |   |
| PHF2     | NM_005392    | -1 | 0  | -1 | 0  | X |   |   | X | X |   |   | X |   |   |
| PI16     | NM_153370    | 1  | -1 | 0  | 1  | X | X | X |   |   |   |   | X |   |   |
| PIGZ     | NM_025163    | 0  | 0  | -1 | -1 | X |   |   |   | X | X | X |   |   |   |
| PLAGL1   | NM_006718    | -1 | 0  | 1  | -1 |   |   |   | X | X | X | X |   |   |   |
| PLAGL1   | NM_006718    | -1 | 0  | 1  | -1 |   |   |   | X | X | X | X |   |   |   |
| PLEKHG5  | NM_198681    | 1  | -1 | 1  | 0  |   | X |   |   |   |   | X |   | X | X |
| PNKD     | NM_015488    | -1 | -1 | -1 | 0  | X | X |   |   |   |   |   | X |   | X |
| POMT2    | NM_013382    | 0  | 0  | -1 | -1 | X | X |   | X |   |   |   | X |   |   |
| PPP1R3E  | AK024489     | 0  | -1 | -1 | 0  |   |   | X |   | X |   | X |   | X |   |
| PRKAR1A  | NM_212472    | -1 | 0  | -1 | 0  |   |   |   | X | X | X | X |   |   |   |
| PRMT5    | NM_006109    | 0  | 1  | -1 | 0  | X |   | X |   |   | X |   | X |   |   |
| PRNP     | NM_000311    | 0  | 0  | -1 | -1 |   |   |   |   | X | X | X |   | X |   |
| PROSC    | NM_007198    | -1 | -1 | -1 | -1 | X |   |   | X | X |   |   |   | X |   |

|         |              |    |    |    |    |   |   |   |   |   |   |   |   |   |
|---------|--------------|----|----|----|----|---|---|---|---|---|---|---|---|---|
| PSKH1   | NM_006742    | -1 | 0  | -1 | -1 | X |   | X |   |   | X | X |   |   |
| PTK2B   | NM_173174    | -1 | -1 | -1 | 0  |   |   | X |   | X | X |   |   | X |
| PTPN14  | NM_005401    | 1  | -1 | -1 | 1  |   |   |   |   | X | X | X | X |   |
| PTPN18  | NM_014369    | 0  | -1 | 1  | 0  | X |   | X |   |   | X |   | X |   |
| PTPRH   | NM_002842    | -1 | 0  | 1  | -1 |   |   | X |   | X | X | X |   |   |
| PTPRK   | NM_002844    | 1  | -1 | 0  | -1 |   | X |   |   | X | X |   | X |   |
| R3HDM2  | NM_014925    | -1 | 0  | 0  | -1 | X |   | X |   | X | X |   |   |   |
| RAB27A  | NM_004580    | -1 | -1 | -1 | -1 | X |   |   | X | X | X |   |   |   |
| RBBP4   | NM_005610    | 0  | 0  | -1 | 1  |   | X |   |   |   | X |   | X | X |
| RBBP9   | NM_006606    | -1 | -1 | 0  | -1 |   |   | X | X | X |   |   |   | X |
| RBCK1   | NM_031229    | -1 | -1 | -1 | -1 | X | X |   | X |   |   |   |   | X |
| RBM17   | NM_032905    | 0  | 0  | -1 | 0  |   |   | X |   | X | X |   |   | X |
| RDH10   | NM_172037    | 1  | 0  | -1 | 0  | X |   |   | X |   |   | X |   | X |
| RECQL5  | NM_004259    | -1 | 0  | -1 | -1 | X |   |   |   | X |   |   | X | X |
| RER1    | NM_007033    | -1 | 0  | -1 | 0  | X | X |   |   | X |   |   | X |   |
| RGS20   | NM_170587    | 1  | -1 | 0  | -1 |   | X |   | X | X |   |   | X |   |
| RHOF    | NM_019034    | 0  | 1  | -1 | -1 | X |   |   |   | X |   |   | X | X |
| RIN1    | NM_004292    | 1  | -1 | -1 | -1 |   |   | X |   | X |   |   | X | X |
| RNF14   | NM_004290    | -1 | 0  | 0  | -1 |   |   | X | X | X | X |   |   |   |
| RPL31   | BC070210     | 0  | -1 | -1 | 0  |   | X |   |   | X |   |   | X | X |
| SAT2    | NM_133491    | -1 | 0  | 1  | 0  |   | X | X |   | X |   |   | X |   |
| SCLT1   | NM_144643    | -1 | 0  | 1  | 0  |   |   |   | X | X | X | X |   |   |
| SDK1    | NM_152744    | 1  | 0  | -1 | 0  | X |   | X |   | X |   |   |   | X |
| SEC24C  | NM_004922    | -1 | -1 | -1 | 0  | X |   | X | X |   |   |   |   | X |
| SEPT9   | NM_006640    | 0  | 0  | -1 | 0  | X |   |   |   | X |   |   |   | X |
| SERTAD3 | NM_203344    | 1  | 1  | -1 | 1  | X |   | X | X |   |   |   |   | X |
| SGTB    | NM_019072    | -1 | 1  | 1  | -1 |   |   | X |   | X |   |   | X | X |
| SIAE    | NM_170601    | -1 | -1 | 0  | 0  |   |   |   | X | X |   |   | X | X |
| SIX1    | NM_005982    | 1  | -1 | 0  | 0  |   | X | X | X | X |   |   |   |   |
| SKAP1   | NM_003726    | 1  | -1 | 1  | 0  | X |   |   |   | X | X | X |   |   |
| SLC12A7 | NM_006598    | 0  | 0  | -1 | -1 | X |   |   |   | X |   |   | X | X |
| SLC13A3 | NM_001011554 | -1 | 0  | 1  | 1  |   |   | X |   | X | X |   |   | X |
| SLC16A2 | NM_006517    | -1 | 1  | -1 | 1  |   |   | X |   | X | X |   |   | X |
| SLC1A3  | NM_004172    | -1 | 1  | 0  | -1 |   |   | X |   | X | X |   |   | X |
| SLC23A3 | NM_144712    | -1 | -1 | -1 | -1 | X |   |   | X |   |   | X | X |   |
| SLC23A3 | AK055730     | -1 | -1 | -1 | 0  | X |   |   | X |   |   | X | X |   |
| SLC30A5 | BX537394     | -1 | 0  | 1  | -1 |   |   |   | X | X | X | X |   |   |
| SLC35F3 | NM_173508    | 1  | -1 | 0  | 0  | X |   |   | X | X |   |   | X |   |
| SLC38A1 | NM_030674    | 0  | -1 | 0  | -1 |   |   |   | X | X | X | X |   |   |
| SLC3A1  | NM_000341    | 0  | -1 | 0  | -1 | X |   |   |   | X | X |   |   | X |
| SLC6A12 | NM_003044    | 1  | -1 | 1  | -1 | X |   | X |   |   | X |   | X |   |
| SLIT2   | NM_004787    | -1 | 1  | 1  | 0  |   |   | X |   | X | X | X |   |   |
| SNX24   | NM_014035    | -1 | 0  | 1  | -1 |   | X |   |   | X |   |   | X | X |
| SPDYA   | NM_001008779 | -1 | 1  | 1  | 0  |   | X |   |   | X | X |   |   | X |
| SPG11   | NM_025137    | -1 | 0  | -1 | -1 |   | X |   |   | X | X |   |   | X |
| SPOCD1  | AK097227     | -1 | 0  | 0  | -1 |   | X | X | X |   |   |   |   | X |
| SSPN    | NM_005086    | -1 | 0  | -1 | 0  |   | X |   |   |   | X | X | X |   |
| STAT3   | NM_213662    | 0  | 1  | -1 | 1  | X |   |   | X | X |   |   | X |   |
| STAT5B  | NM_012448    | -1 | -1 | 0  | 0  |   |   |   | X | X | X |   |   | X |
| SUMF2   | NM_015411    | -1 | -1 | -1 | -1 |   |   |   | X | X |   |   | X | X |
| SYNJ2BP | NM_018373    | -1 | 1  | 1  | 0  |   |   | X | X |   | X |   |   | X |
| SYT17   | NM_016524    | 0  | -1 | 0  | 0  | X |   |   |   | X |   |   | X | X |
| TAPBP   | NM_003190    | 0  | 0  | -1 | -1 |   |   |   |   | X | X | X |   | X |
| TAPBP   | NM_172209    | 0  | 0  | -1 | -1 |   |   |   |   | X | X | X |   | X |
| TBL2    | NM_012453    | 0  | 0  | -1 | 0  |   |   |   |   |   | X | X | X | X |
| TEF     | NM_003216    | 0  | 0  | -1 | 1  | X |   | X |   |   | X |   |   | X |
| TGIF2   | NM_021809    | 0  | 0  | -1 | 0  |   |   | X | X |   | X | X |   |   |
| TMBIM1  | NM_022152    | -1 | -1 | -1 | -1 | X |   | X |   | X |   |   | X |   |
| TMEM104 | AK000262     | -1 | 0  | 0  | -1 | X |   | X |   |   |   | X |   | X |
| TMEM105 | NM_178520    | -1 | 0  | -1 | -1 |   |   | X |   |   |   | X | X | X |
| TMEM143 | NM_018273    | -1 | 0  | -1 | 0  | X |   | X |   |   | X |   |   | X |
| TMEM169 | NM_138390    | -1 | -1 | 1  | -1 |   |   | X |   | X | X |   |   | X |
| TMEM39A | NM_018266    | -1 | 0  | -1 | -1 | X |   |   | X | X | X |   |   |   |
| TMEM39B | NM_018056    | 0  | 0  | -1 | 0  | X | X | X |   |   |   |   | X |   |
| TNF     | NM_000594    | 1  | 0  | -1 | -1 | X |   |   |   | X | X | X |   |   |
| TOM1L2  | NM_001082968 | -1 | 0  | 0  | 0  |   |   |   |   | X | X |   |   | X |

|           |              |    |    |    |    |   |   |   |   |   |   |   |   |   |
|-----------|--------------|----|----|----|----|---|---|---|---|---|---|---|---|---|
| TOR2A     | NM_130459    | -1 | -1 | -1 | 1  |   | X |   |   |   | X | X | X |   |
| TRIM4     | NM_033017    | 0  | -1 | -1 | 0  | X |   |   |   | X |   |   | X | X |
| TRIM5     | NM_033092    | -1 | 0  | -1 | 0  |   | X |   |   | X |   |   | X | X |
| TRIM6     | NM_001003818 | 1  | -1 | -1 | 1  |   |   | X |   | X |   | X | X |   |
| TRIM65    | NM_173547    | -1 | 0  | -1 | 0  |   | X |   |   | X |   | X | X |   |
| TRIP10    | NM_004240    | 0  | 0  | -1 | -1 | X | X |   |   | X | X |   |   |   |
| TRPM3     | NM_001007471 | -1 | -1 | -1 | 0  | X |   |   | X | X |   |   |   | X |
| TSEN34    | NM_024075    | 0  | 1  | -1 | 1  | X |   |   | X | X |   | X |   |   |
| TWIST1    | NM_000474    | 1  | -1 | -1 | 1  | X |   |   |   |   | X |   |   | X |
| UCP3      | NM_003356    | -1 | 1  | 1  | 0  | X | X |   |   |   | X | X |   |   |
| UHRF2     | NM_152896    | 1  | 0  | -1 | 0  | X |   | X |   | X | X |   |   |   |
| URM1      | NM_030914    | 0  | -1 | -1 | 0  | X |   | X |   | X | X |   |   |   |
| USF2      | NM_003367    | -1 | -1 | -1 | -1 |   |   |   | X | X | X |   |   | X |
| VPS26B    | NM_052875    | -1 | -1 | -1 | 0  | X |   |   | X | X |   |   | X |   |
| VTA1      | NM_016485    | -1 | 1  | 1  | 0  |   |   |   | X | X |   | X |   | X |
| XBP1      | NM_005080    | -1 | 0  | -1 | 0  |   |   | X | X |   |   |   | X | X |
| ZBTB47    | NM_145166    | -1 | -1 | -1 | 0  | X |   |   |   |   | X | X | X |   |
| ZFYVE9    | NM_004799    | 0  | -1 | 0  | 0  |   | X |   |   | X | X |   | X |   |
| ZNF17     | AB075827     | -1 | -1 | -1 | 0  |   | X |   |   |   |   | X | X | X |
| ZNF202    | NM_003455    | 0  | 0  | -1 | -1 |   | X |   | X |   | X |   | X |   |
| ZNF233    | NM_181756    | -1 | 0  | 1  | -1 |   |   | X |   | X | X | X |   |   |
| ZNF273    | BC019234     | -1 | 1  | -1 | 1  |   |   | X | X | X |   |   |   | X |
| ZNF282    | NM_003575    | 0  | -1 | -1 | -1 |   |   | X |   | X | X |   | X |   |
| ZNF333    | NM_032433    | -1 | 0  | -1 | -1 |   |   |   | X | X |   |   | X | X |
| ZNF469    | AB058761     | 0  | -1 | -1 | -1 |   |   |   | X |   | X |   | X | X |
| ZNF616    | BC032805     | -1 | 0  | 1  | 0  |   | X | X |   |   | X |   | X |   |
| ZNF649    | NM_023074    | 1  | 1  | -1 | 0  | X |   |   |   | X |   | X | X |   |
| ZSCAN22   | NM_181846    | -1 | -1 | -1 | 0  | X |   |   | X |   | X |   |   | X |
| ABHD14B   | NM_032750    | -1 | -1 | -1 | 0  |   |   |   | X |   |   | X |   | X |
| ABHD4     | NM_022060    | -1 | -1 | -1 | -1 | X |   | X |   |   |   |   |   | X |
| ABTB1     | NM_172027    | 0  | 0  | -1 | -1 |   |   | X |   |   |   | X | X |   |
| ACAD10    | NM_025247    | 0  | 0  | -1 | 0  | X | X |   |   |   |   | X |   |   |
| ACSS1     | NM_032501    | 1  | 0  | -1 | -1 |   |   | X |   | X | X |   |   |   |
| ADAM21    | NM_003813    | 0  | -1 | 0  | 1  |   | X |   |   |   | X |   | X |   |
| ADI1      | NM_018269    | -1 | -1 | 0  | 0  | X |   |   |   | X |   |   |   | X |
| AGA       | NM_000027    | -1 | 0  | 1  | -1 |   |   |   |   |   | X | X |   | X |
| ALDH16A1  | NM_153329    | 1  | 0  | -1 | 1  | X |   |   |   | X |   |   | X |   |
| ALDH1L1   | NM_012190    | 0  | 1  | -1 | 0  |   |   | X |   |   | X |   | X |   |
| AMT       | NM_000481    | -1 | -1 | -1 | -1 | X |   |   |   | X |   |   | X |   |
| ANK1      | NM_020478    | 1  | 1  | -1 | 1  |   |   | X | X | X |   |   |   |   |
| ANKAR     | NM_144708    | -1 | -1 | 0  | 0  |   |   |   | X | X | X |   |   |   |
| ANKRD45   | NM_198493    | -1 | 0  | 1  | 0  |   |   |   |   | X | X | X |   |   |
| APOBEC3C  | NM_014508    | -1 | 0  | -1 | 0  |   |   | X |   |   |   | X |   | X |
| ARHGAP23  | XM_290799    | -1 | 1  | 1  | 0  |   |   |   | X |   |   |   | X | X |
| ARHGAP27  | NM_199282    | -1 | 0  | -1 | 0  |   |   |   |   |   |   | X | X | X |
| ARHGEF1   | NM_199002    | -1 | -1 | -1 | 0  | X | X |   |   |   |   |   |   | X |
| ARHGEF4   | NM_032995    | 1  | 0  | 1  | -1 | X |   |   |   | X |   | X |   |   |
| ARL2BP    | NM_012106    | -1 | 0  | 1  | -1 |   |   |   |   | X | X |   |   | X |
| ARRDC1    | NM_152285    | 0  | -1 | -1 | 0  | X | X |   |   |   |   |   | X |   |
| ASB13     | NM_024701    | 0  | -1 | -1 | -1 |   |   |   |   | X |   | X | X |   |
| ASB9      | NM_024087    | 0  | -1 | -1 | 0  |   |   |   | X | X |   |   |   | X |
| ASPHD1    | NM_181718    | 1  | -1 | -1 | 1  | X |   |   |   |   | X | X |   |   |
| ATO8      | NM_032827    | 1  | 0  | -1 | 1  |   |   |   | X |   | X |   | X |   |
| B3GNTL1   | NM_001009905 | -1 | 0  | -1 | -1 |   |   |   |   |   |   | X | X | X |
| BCAS3     | NM_017679    | -1 | 0  | -1 | 0  |   | X | X |   | X |   |   |   |   |
| BCAT2     | NM_001190    | 0  | -1 | -1 | 0  |   |   |   |   |   | X |   |   | X |
| BCL7B     | NM_138707    | 0  | -1 | -1 | -1 |   |   |   | X | X |   | X |   |   |
| BTD       | NM_000060    | -1 | -1 | -1 | 1  | X |   | X |   |   |   |   |   | X |
| BTNL2     | NM_019602    | -1 | 0  | -1 | -1 |   |   | X |   | X |   | X |   |   |
| C14orf149 | NM_144581    | -1 | -1 | -1 | 1  |   | X | X |   | X |   |   |   |   |
| C14orf159 | NM_024952    | 0  | 0  | -1 | 0  | X |   |   |   | X |   |   | X |   |
| C14orf45  | NM_025057    | -1 | 0  | 1  | -1 |   |   | X |   | X | X |   |   |   |
| C15orf40  | NM_144597    | -1 | 0  | 0  | 0  |   |   |   |   | X | X |   |   | X |
| C17orf53  | NM_024032    | 1  | 1  | -1 | 1  |   |   | X | X |   |   |   | X |   |
| C19orf12  | NM_031448    | -1 | -1 | -1 | 0  | X |   |   |   | X |   |   |   | X |
| C1orf88   | NM_181643    | -1 | -1 | 1  | 1  | X | X |   |   |   | X |   |   |   |

|           |              |    |    |    |    |   |   |   |   |   |   |   |   |   |   |
|-----------|--------------|----|----|----|----|---|---|---|---|---|---|---|---|---|---|
| C1S       | NM_001734    | -1 | 1  | 1  | 0  |   |   | X |   | X |   | X |   |   |   |
| C20orf112 | AK097804     | 1  | 1  | -1 | 1  |   |   | X |   | X |   |   |   |   | X |
| C20orf132 | NM_213631    | 0  | 0  | -1 | 1  | X |   |   |   | X | X |   |   |   |   |
| C20orf196 | NM_152504    | -1 | 0  | -1 | -1 |   |   |   | X | X |   |   | X |   |   |
| C22orf26  | NM_018280    | -1 | -1 | 0  | -1 |   |   | X | X |   | X |   |   |   |   |
| C3orf18   | NM_016210    | -1 | -1 | -1 | -1 |   | X |   | X |   |   |   |   | X |   |
| C4orf36   | NM_144645    | -1 | -1 | -1 | -1 |   |   | X |   | X | X |   |   |   |   |
| C7orf10   | NM_024728    | -1 | 1  | -1 | 1  | X | X |   |   | X |   |   |   |   |   |
| C9orf123  | NM_033428    | -1 | 0  | -1 | -1 |   | X | X |   | X |   |   |   |   |   |
| CAMK2G    | NM_172171    | -1 | -1 | -1 | 0  |   |   |   | X |   |   | X | X |   |   |
| CATSPER2  | NM_172095    | -1 | -1 | 0  | -1 |   |   |   | X | X |   | X |   |   |   |
| CC2D1A    | NM_017721    | -1 | -1 | -1 | 0  |   |   |   |   |   | X | X | X |   |   |
| CCDC71    | NM_022903    | 1  | 0  | -1 | 1  |   | X |   |   |   |   | X | X |   |   |
| CCDC71    | AK023691     | -1 | 0  | -1 | 0  |   | X |   |   |   |   | X | X |   |   |
| CCDC92    | NM_025140    | -1 | 0  | -1 | -1 |   | X |   |   |   | X | X |   |   |   |
| CDK10     | NM_052987    | -1 | -1 | -1 | 1  |   |   | X |   | X |   |   | X |   |   |
| CDRT4     | NM_173622    | -1 | 0  | 0  | 0  |   |   | X | X | X |   |   |   |   |   |
| CEACAM19  | AK128234     | -1 | 1  | 0  | 1  |   |   |   |   | X | X |   |   | X |   |
| CECR5     | NM_033070    | 0  | 0  | -1 | 0  | X |   |   |   | X |   | X |   |   |   |
| CHMP4C    | NM_152284    | -1 | 0  | 1  | -1 |   |   |   |   |   | X | X |   | X |   |
| CHST3     | NM_004273    | 0  | -1 | -1 | 0  |   |   | X | X | X |   |   |   |   |   |
| CHST4     | NM_005769    | 0  | -1 | -1 | 0  |   |   | X | X |   | X |   |   |   |   |
| CIRBP     | AK128423     | -1 | 0  | -1 | -1 | X | X |   |   |   |   |   | X |   |   |
| CIRBP     | NM_001280    | -1 | 0  | 0  | 0  | X | X |   |   |   |   |   | X |   |   |
| CLDN15    | NM_014343    | -1 | 0  | -1 | 0  |   | X | X |   | X |   |   |   |   |   |
| CMBL      | NM_138809    | -1 | -1 | -1 | 0  | X |   |   | X |   |   |   |   | X |   |
| CNDP2     | NM_018235    | 0  | -1 | -1 | -1 |   | X |   |   | X |   |   | X |   |   |
| CNIH3     | NM_152495    | 1  | 0  | -1 | -1 |   | X | X |   |   |   |   | X |   |   |
| CNTNAP1   | NM_003632    | -1 | 0  | -1 | -1 | X |   | X |   |   |   |   |   | X |   |
| COMMD9    | NM_014186    | -1 | -1 | -1 | 0  |   |   |   |   | X |   |   | X |   | X |
| COQ9      | AK075438     | -1 | 0  | 0  | 0  | X |   |   |   | X |   | X |   |   |   |
| CORO1B    | NM_020441    | -1 | -1 | -1 | -1 | X |   | X |   |   |   |   |   | X |   |
| CPT1B     | NM_152246    | -1 | -1 | -1 | -1 |   | X | X |   |   |   |   | X |   |   |
| CRHR1     | NM_004382    | 0  | -1 | -1 | 0  |   |   | X |   |   |   | X | X |   |   |
| CTSK      | NM_000396    | -1 | 0  | 0  | -1 |   |   | X |   |   | X |   |   | X |   |
| CTSS      | NM_004079    | 0  | -1 | 0  | 0  |   |   |   | X | X |   | X |   |   |   |
| CUEDC1    | NM_017949    | -1 | 0  | -1 | 0  | X |   |   | X |   |   | X |   |   |   |
| CYB561    | NM_001017916 | -1 | 1  | 0  | -1 | X |   |   |   | X | X |   |   |   |   |
| CYP20A1   | NM_177538    | -1 | -1 | -1 | -1 |   |   |   |   | X | X | X |   |   |   |
| CYP2B6    | NM_000767    | 0  | -1 | -1 | -1 |   |   | X |   |   |   | X |   | X |   |
| CYP4V2    | NM_207352    | -1 | -1 | 0  | -1 | X |   |   |   |   | X | X |   |   |   |
| CYSLTR1   | NM_006639    | 0  | -1 | -1 | -1 |   |   | X |   | X | X |   |   |   |   |
| DAP       | NM_004394    | -1 | 1  | 0  | 0  | X |   |   |   | X | X |   |   |   |   |
| DCP1B     | NM_152640    | -1 | 0  | -1 | 0  |   |   |   | X | X | X |   |   |   |   |
| DDR1      | NM_013994    | 1  | 0  | -1 | 1  |   |   | X |   |   |   | X |   | X |   |
| DECR1     | NM_001359    | -1 | -1 | -1 | -1 | X |   |   | X |   | X |   |   |   |   |
| DHRX      | NM_145177    | 0  | 1  | -1 | 0  |   |   |   |   | X |   | X |   | X |   |
| DNAJC11   | NM_018198    | 0  | -1 | -1 | 0  |   |   |   | X | X |   | X |   |   |   |
| DNAJC8    | NM_014280    | -1 | 0  | 0  | -1 |   |   | X |   |   | X |   |   | X |   |
| DNASE2    | NM_001375    | 0  | -1 | -1 | -1 | X |   |   |   |   |   | X | X |   |   |
| DPH2      | NM_001384    | 0  | 0  | -1 | -1 | X |   | X |   |   |   | X |   |   |   |
| DPP9      | NM_139159    | 0  | 0  | -1 | -1 |   |   | X | X |   |   | X |   |   |   |
| DPYD      | NM_000110    | 0  | 1  | -1 | 0  |   |   |   |   | X | X | X |   |   |   |
| EFHD1     | NM_025202    | -1 | -1 | 1  | 1  |   |   | X | X |   |   | X |   |   |   |
| ELF3      | NM_004433    | 1  | -1 | 0  | 0  | X | X |   |   |   |   |   |   | X |   |
| ELK1      | NM_005229    | -1 | 0  | -1 | -1 |   |   | X | X |   |   |   |   | X |   |
| EPS8L2    | NM_022772    | 0  | -1 | -1 | 0  |   |   |   |   | X |   |   | X | X |   |
| ERCC2     | NM_000400    | -1 | 0  | -1 | 0  |   |   | X |   | X |   |   |   | X |   |
| ERCC6     | NM_000124    | 0  | 0  | -1 | 1  |   |   |   |   |   |   | X | X | X |   |
| ERN1      | NM_001433    | -1 | 1  | 0  | -1 | X | X |   |   |   |   |   | X |   |   |
| ETV6      | NM_001987    | 1  | 0  | -1 | 0  |   |   |   | X | X |   |   |   | X |   |
| FAM134C   | NM_178126    | -1 | 0  | 0  | 0  | X |   |   |   | X |   |   |   | X |   |
| FAM62B    | NM_020728    | 1  | -1 | 1  | 1  | X | X |   |   |   | X |   |   |   |   |
| FANCD2    | NM_001018115 | 0  | 1  | -1 | -1 |   |   |   | X | X |   |   | X |   |   |
| FARS2     | NM_006567    | -1 | 0  | -1 | 0  |   |   |   |   | X | X | X |   |   |   |
| FBXO17    | NM_024907    | -1 | 0  | -1 | -1 | X |   |   |   | X | X |   |   |   |   |

|           |              |    |    |    |    |   |   |   |   |   |   |   |   |   |   |
|-----------|--------------|----|----|----|----|---|---|---|---|---|---|---|---|---|---|
| FCRLA     | NM_032738    | -1 | 0  | 0  | -1 |   |   | X | X |   |   |   |   | X |   |
| FEZ1      | NM_005103    | 0  | 1  | -1 | 0  |   |   |   | X | X |   | X |   |   |   |
| FGF11     | NM_004112    | 0  | -1 | 0  | -1 |   |   | X |   |   | X |   |   | X |   |
| FKBP10    | NM_021939    | -1 | -1 | -1 | 0  |   |   | X | X | X |   |   |   |   |   |
| FTH1      | NM_002032    | -1 | -1 | -1 | -1 |   |   | X |   | X |   | X |   |   |   |
| FUT10     | NM_032664    | 0  | -1 | -1 | 0  | X |   | X |   |   |   | X |   |   |   |
| GCC1      | NM_024523    | -1 | 1  | 1  | -1 | X |   |   |   |   | X | X |   |   |   |
| GHDC      | NM_032484    | -1 | -1 | -1 | 0  | X |   |   |   |   | X | X |   |   |   |
| GLB1      | NM_000404    | 0  | 0  | -1 | 0  |   |   |   | X | X | X |   |   |   |   |
| GLTP      | NM_016433    | -1 | -1 | 0  | -1 |   |   | X |   | X | X |   |   |   |   |
| GMPR2     | NM_001002000 | -1 | 0  | -1 | 0  | X |   |   | X |   |   |   | X |   |   |
| GNL3L     | NM_019067    | -1 | 0  | 1  | -1 |   | X |   |   | X |   |   | X |   |   |
| GPR160    | NM_014373    | 1  | -1 | 0  | -1 |   | X |   |   |   |   | X | X |   |   |
| GPR3      | NM_005281    | 0  | -1 | 1  | 0  | X |   | X | X |   |   |   |   |   |   |
| GPRASP1   | NM_014710    | -1 | 1  | -1 | 0  | X |   |   |   | X | X |   |   |   |   |
| GSTM4     | NM_147148    | -1 | -1 | 1  | 0  | X |   |   | X |   |   | X |   |   |   |
| GSTM4     | NM_147148    | -1 | -1 | 1  | 0  | X |   |   | X |   |   | X |   |   |   |
| H1FO      | NM_005318    | -1 | 0  | 0  | 1  |   |   |   |   | X | X | X |   |   |   |
| HAPLN3    | NM_178232    | 1  | -1 | 0  | 1  |   |   |   |   |   | X |   | X |   | X |
| HEATR5B   | NM_019024    | 0  | -1 | 0  | 0  |   |   |   |   | X | X |   |   |   | X |
| HEMK1     | NM_016173    | -1 | -1 | 0  | -1 | X |   | X | X |   |   |   |   |   |   |
| HERPUD1   | NM_014685    | -1 | 0  | 1  | -1 |   |   |   |   | X | X | X |   |   |   |
| HIST1H4E  | NM_003545    | -1 | 0  | -1 | 0  |   |   |   | X | X |   | X |   |   |   |
| HLA-DOA   | NM_002119    | 1  | -1 | 0  | -1 |   |   |   |   |   | X | X |   | X |   |
| HLA-DRB1  | NM_002124    | 0  | -1 | 0  | 0  |   |   | X |   | X |   | X |   |   |   |
| HLA-DRB5  | NM_002125    | 0  | -1 | 1  | 0  |   |   | X |   | X | X |   |   |   |   |
| HOXA4     | NM_002141    | 1  | -1 | 0  | 1  |   | X |   |   |   |   |   | X | X |   |
| HSPG2     | NM_005529    | -1 | -1 | -1 | 0  | X | X | X |   |   |   |   |   |   |   |
| HTR7      | NM_019859    | 1  | 0  | 0  | -1 |   |   |   | X | X |   |   |   |   | X |
| IDH3B     | NM_174855    | -1 | -1 | -1 | -1 |   | X | X |   |   |   |   | X |   |   |
| IFRD2     | NM_006764    | -1 | -1 | -1 | -1 | X |   |   |   |   |   | X | X |   |   |
| IPP       | NM_005897    | -1 | 0  | 0  | 0  |   |   |   | X | X |   | X |   |   |   |
| IQCG      | NM_032263    | -1 | 0  | 1  | 0  |   | X |   |   | X |   |   | X |   |   |
| KATNAL2   | NM_031303    | -1 | -1 | 0  | -1 |   |   | X |   |   | X |   |   | X |   |
| KCNJ14    | NM_170720    | -1 | 0  | -1 | 0  |   |   |   |   |   | X | X | X |   |   |
| KIAA0319L | NM_024874    | -1 | -1 | -1 | 0  |   | X |   |   |   |   | X | X |   |   |
| KIAA1967  | NM_021174    | 1  | 0  | -1 | 1  |   |   | X |   | X | X |   |   |   |   |
| KIRREL2   | NM_199180    | -1 | 0  | 0  | 1  | X |   |   |   |   | X | X |   |   |   |
| KLHL5     | NM_015990    | -1 | 1  | 0  | 0  | X |   | X |   |   |   | X |   |   |   |
| KLHL5     | NM_015990    | -1 | 1  | 0  | 0  | X |   | X |   |   |   | X |   |   |   |
| KRT80     | NM_182507    | 1  | 0  | -1 | -1 |   |   |   |   | X | X |   | X |   |   |
| L1CAM     | NM_024003    | 1  | -1 | -1 | 1  |   |   | X |   | X |   |   |   |   | X |
| LAMP3     | NM_014398    | -1 | 1  | 0  | -1 |   |   |   | X | X | X |   |   |   |   |
| LHPP      | NM_022126    | -1 | 0  | -1 | 1  | X |   |   | X |   |   |   |   |   | X |
| LIMK1     | NM_002314    | 0  | 0  | -1 | 1  | X |   |   |   |   |   |   | X | X |   |
| LMAN2L    | NM_030805    | -1 | 0  | 0  | 0  | X |   | X |   |   |   | X |   |   |   |
| LRRC37A2  | NM_001006607 | -1 | 0  | 0  | 0  |   | X |   |   |   |   | X | X |   |   |
| LTB       | NM_002341    | 1  | 1  | -1 | 1  |   | X |   |   | X |   |   | X |   |   |
| LTB4R     | NM_181657    | -1 | 0  | 0  | 0  |   | X |   |   |   | X |   | X |   |   |
| LTBP3     | NM_021070    | 0  | -1 | -1 | 0  | X | X |   |   |   |   |   |   |   | X |
| MAN2C1    | NM_006715    | -1 | -1 | 0  | 1  | X |   |   |   |   |   | X |   |   | X |
| MAP1LC3C  | NM_001004343 | 0  | -1 | 1  | 1  |   |   |   | X | X |   |   |   |   | X |
| MAP2K5    | NM_002757    | -1 | 0  | -1 | 0  |   |   |   |   | X |   | X |   | X |   |
| MAP3K5    | NM_005923    | 1  | 0  | -1 | -1 |   | X |   |   | X |   | X |   |   |   |
| MAZ       | NM_002383    | -1 | 0  | -1 | 0  |   |   | X |   |   |   |   | X | X |   |
| MEOX1     | NM_004527    | 1  | 0  | -1 | -1 |   |   | X |   | X |   |   |   |   | X |
| MLLT11    | NM_006818    | -1 | -1 | 1  | 0  |   |   | X |   | X |   |   |   |   | X |
| MMACHC    | NM_015506    | 1  | -1 | -1 | 0  |   |   | X |   |   |   |   | X | X |   |
| MMP2      | NM_004530    | 1  | 0  | -1 | 1  | X |   |   |   |   | X |   |   |   | X |
| MRPL52    | NM_181304    | -1 | 0  | -1 | 0  |   |   |   |   | X | X |   | X |   |   |
| MRPS27    | NM_015084    | 0  | -1 | 0  | 0  | X |   |   |   |   |   | X | X |   |   |
| MST1R     | NM_002447    | 0  | 0  | -1 | 0  |   | X |   |   |   |   | X |   | X |   |
| MTL5      | NM_004923    | -1 | 0  | -1 | -1 |   |   | X |   |   | X | X |   |   |   |
| MTL5      | NM_001039656 | -1 | 0  | -1 | 0  |   |   | X |   |   | X | X |   |   |   |
| MXD3      | NM_031300    | -1 | 0  | -1 | 1  |   |   |   |   | X |   | X |   |   | X |
| MYADM     | NM_001020818 | 0  | -1 | -1 | -1 | X |   | X |   |   | X |   |   |   |   |



|           |              |    |    |    |    |   |   |   |   |   |   |   |   |   |   |   |   |
|-----------|--------------|----|----|----|----|---|---|---|---|---|---|---|---|---|---|---|---|
| NAPB      | NM_022080    | -1 | 0  | 1  | -1 |   |   |   | X | X | X |   |   |   |   |   |   |
| NAT14     | NM_020378    | 0  | -1 | -1 | 1  |   |   |   |   | X |   | X |   |   | X |   |   |
| NBL1      | NM_182744    | 1  | -1 | 0  | 1  |   |   | X |   |   |   | X | X |   |   |   |   |
| NCOA5     | NM_020967    | -1 | -1 | -1 | -1 |   |   | X |   | X |   |   |   | X |   |   |   |
| NEK3      | NM_002498    | -1 | -1 | 0  | -1 | X |   |   |   | X |   |   |   |   |   |   | X |
| NEURL2    | NM_080749    | -1 | -1 | -1 | 0  |   |   |   |   | X | X | X |   |   |   |   |   |
| NFX1      | NM_002504    | -1 | -1 | -1 | 1  |   |   |   |   | X | X | X |   |   |   |   |   |
| NIPSNAP3A | NM_015469    | 0  | 0  | -1 | 0  |   | X |   |   |   | X |   |   | X |   |   |   |
| NKIRAS2   | NM_001001349 | -1 | 0  | 0  | 0  |   |   |   |   |   |   | X |   | X | X | X |   |
| NLRP3     | NM_004895    | 0  | 0  | 0  | -1 |   |   |   |   | X |   | X |   |   |   |   | X |
| NME4      | NM_005009    | 0  | -1 | -1 | 0  | X |   |   |   |   | X |   |   |   |   | X |   |
| NME6      | NM_005793    | -1 | 0  | -1 | 0  |   |   | X |   | X | X |   |   |   |   |   |   |
| NRM       | NM_007243    | -1 | 0  | -1 | 1  |   | X |   |   |   |   |   | X | X |   |   |   |
| NSUN4     | NM_199044    | 0  | -1 | -1 | 1  | X |   |   |   |   |   |   |   | X |   |   | X |
| OAF       | NM_178507    | 0  | -1 | -1 | -1 | X |   |   |   |   | X | X |   |   |   |   |   |
| OBSL1     | AK023854     | -1 | 0  | -1 | 1  |   | X | X |   |   |   |   |   |   |   | X |   |
| P2RX7     | NM_002562    | -1 | 1  | 1  | 0  |   |   | X | X |   | X |   |   |   |   |   |   |
| PAQR4     | NM_152341    | 0  | 0  | -1 | 0  |   |   | X |   |   |   |   |   | X | X |   |   |
| PAQR7     | NM_178422    | 0  | -1 | -1 | -1 |   |   |   |   |   | X |   |   | X | X |   |   |
| PARVB     | NM_001003828 | 0  | 0  | -1 | -1 | X |   |   |   | X |   |   |   |   |   | X |   |
| PCDHA11   | NM_018902    | -1 | 0  | 0  | -1 | X |   |   |   | X | X |   |   |   |   |   |   |
| PCDHB9    | NM_019119    | -1 | 1  | 0  | 0  |   |   |   |   | X |   |   | X |   |   |   | X |
| PCK2      | NM_004563    | 0  | 1  | -1 | -1 |   |   |   |   |   | X | X | X |   |   |   |   |
| PCK2      | NM_004563    | 0  | 1  | -1 | -1 |   |   |   |   |   | X | X | X |   |   |   |   |
| PCNXL2    | NM_024938    | -1 | -1 | -1 | -1 | X |   |   |   |   |   |   |   | X | X |   |   |
| PCNXL2    | NM_014801    | 0  | -1 | 1  | -1 | X |   |   |   |   |   |   |   | X | X |   |   |
| PDK2      | NM_002611    | -1 | 0  | 0  | 1  |   |   |   |   |   | X |   |   |   | X | X | X |
| PECR      | NM_018441    | -1 | 0  | 1  | -1 | X |   |   | X | X |   |   |   |   |   |   |   |
| PES1      | NM_014303    | 0  | 0  | -1 | 0  |   |   | X | X |   |   |   |   |   |   | X |   |
| PGS1      | CR749720     | -1 | 0  | -1 | 0  |   | X |   |   |   |   | X | X |   |   |   |   |
| PGS1      | NM_024419    | 0  | 0  | -1 | 0  |   | X |   |   |   |   | X | X |   |   |   |   |
| PIGC      | NM_002642    | 0  | 0  | -1 | 1  |   |   |   |   | X | X | X |   |   |   |   |   |
| PIGV      | NM_017837    | -1 | 0  | -1 | 0  | X |   |   |   | X |   |   |   |   |   |   | X |
| PLCD4     | NM_032726    | -1 | -1 | 0  | 1  |   |   | X |   |   | X |   |   | X |   |   |   |
| PLGLB2    | NM_002665    | -1 | 0  | 0  | 0  |   |   |   |   | X | X |   |   |   |   | X |   |
| PLOD3     | NM_001084    | -1 | -1 | -1 | 0  | X |   | X |   | X |   |   |   |   |   |   |   |
| PLXNA1    | NM_032242    | 1  | -1 | -1 | 1  |   | X | X |   |   |   |   |   | X |   |   |   |
| PLXNB2    | AB002313     | 1  | 0  | -1 | 1  | X |   |   |   | X |   |   |   |   |   | X |   |
| POPDC3    | NM_022361    | -1 | 1  | 1  | -1 |   | X |   | X |   |   |   |   | X |   |   |   |
| PPAPDC1B  | BC033025     | -1 | 0  | 0  | 0  | X | X |   |   |   |   |   |   | X |   |   |   |
| PPAPDC3   | NM_032728    | -1 | 1  | 1  | 0  |   | X |   |   |   |   |   |   | X | X |   |   |
| PPIA      | NM_021130    | 0  | -1 | -1 | -1 | X |   |   |   |   | X |   |   |   |   | X |   |
| PPIC      | NM_000943    | -1 | -1 | 0  | 0  |   |   |   |   |   | X | X |   |   |   | X |   |
| PPM1E     | NM_014906    | -1 | 1  | 1  | -1 |   |   |   |   | X | X |   |   |   |   |   | X |
| PPP1R3F   | NM_033215    | -1 | 0  | -1 | 1  |   |   |   |   | X | X | X |   |   |   |   |   |
| PPP2R4    | NM_178001    | -1 | 0  | -1 | 1  | X |   |   |   |   | X | X |   |   |   |   |   |
| PRDM11    | AK097878     | -1 | 0  | -1 | 1  | X |   | X |   |   |   |   |   |   |   | X |   |
| PRKAG1    | NM_212461    | -1 | -1 | 0  | 0  | X |   |   |   |   | X |   |   | X |   |   |   |
| PRSS16    | NM_005865    | -1 | 0  | -1 | 0  |   |   | X |   |   | X | X |   |   |   |   |   |
| PSMB7     | AK056654     | 0  | 0  | -1 | 1  |   |   | X |   | X | X |   |   |   |   |   |   |
| PTPN13    | NM_080685    | -1 | -1 | 1  | 0  |   |   |   | X | X | X |   |   |   |   |   |   |
| PTPRM     | NM_002845    | 1  | -1 | 0  | 1  |   |   |   | X |   |   | X | X |   |   |   |   |
| PXK       | NM_017771    | -1 | -1 | 1  | 0  |   |   |   |   | X | X | X |   |   |   |   |   |
| PXK       | AK131385     | -1 | -1 | 0  | 0  |   |   |   |   | X | X | X |   |   |   |   |   |
| PXMP2     | NM_018663    | -1 | 0  | -1 | 1  |   |   |   |   | X |   | X |   |   |   |   | X |
| QRSL1     | NM_018292    | 0  | -1 | 0  | 0  |   |   |   | X | X |   | X |   |   |   |   |   |
| RAI1      | NM_030665    | 1  | 0  | -1 | 0  |   |   |   |   | X |   | X |   |   | X |   |   |
| RALGDS    | NM_006266    | 1  | 0  | -1 | 1  | X |   |   |   |   | X |   |   | X |   |   |   |
| RASSF4    | NM_032023    | -1 | -1 | 0  | 0  |   |   | X |   | X |   |   |   |   |   |   | X |
| RBP1      | NM_002899    | 0  | -1 | 1  | 0  |   |   | X |   | X |   |   |   |   |   | X |   |
| RHOBTB2   | NM_015178    | 0  | 0  | -1 | 1  |   |   |   | X | X | X |   |   |   |   |   |   |
| RNASE4    | NM_194430    | -1 | 1  | -1 | 0  |   |   |   | X | X | X |   |   |   |   |   |   |
| RNPEPL1   | NM_018226    | 0  | -1 | -1 | 1  | X |   | X |   |   |   |   | X |   |   |   |   |
| RUSC2     | NM_014806    | 0  | -1 | -1 | 0  |   |   |   | X |   |   |   | X |   |   | X |   |
| RYR1      | NM_000540    | 0  | 1  | -1 | 0  | X |   | X |   |   |   |   | X |   |   |   |   |
| SALL2     | NM_005407    | 1  | 0  | -1 | 1  |   |   | X |   |   | X |   |   | X |   |   |   |

|            |              |    |    |    |    |   |   |   |   |   |   |   |   |   |   |
|------------|--------------|----|----|----|----|---|---|---|---|---|---|---|---|---|---|
| SAMD10     | NM_080621    | -1 | -1 | -1 | -1 |   |   | X |   |   |   | X |   | X |   |
| SAMD13     | NM_001010971 | -1 | 0  | 0  | 0  |   |   |   | X | X |   | X |   |   |   |
| SAPS2      | NM_014678    | 0  | -1 | -1 | 1  | X | X |   | X |   |   |   |   |   |   |
| SC5DL      | NM_001024956 | 1  | -1 | 1  | 0  | X |   |   | X | X |   |   |   |   |   |
| SC5DL      | NM_006918    | 0  | -1 | 1  | 0  | X |   |   | X | X |   |   |   |   |   |
| SCMH1      | NM_012236    | -1 | 0  | -1 | 0  |   |   | X |   |   | X |   |   | X |   |
| SECTM1     | NM_003004    | 0  | -1 | -1 | 1  |   |   | X |   | X |   |   |   | X |   |
| SELS       | NM_203472    | -1 | 0  | 0  | -1 | X |   | X |   | X |   |   |   |   |   |
| SEPT14     | NM_207366    | -1 | -1 | 1  | 0  |   |   |   | X | X |   | X |   |   |   |
| SH2D4A     | NM_022071    | 0  | 0  | -1 | 0  | X |   |   |   | X | X |   |   |   |   |
| SH3BGRL    | NM_003022    | -1 | -1 | 0  | 0  |   |   |   |   | X | X |   |   |   | X |
| SH3BP1     | NM_018957    | 0  | 1  | -1 | 0  |   |   | X |   |   |   |   | X | X |   |
| SLC16A3    | NM_004207    | 1  | 0  | -1 | -1 |   | X |   |   | X |   |   |   | X |   |
| SLC25A23   | NM_024103    | 0  | -1 | -1 | 0  |   |   | X |   |   |   | X |   | X |   |
| SLC25A26   | NM_173471    | -1 | -1 | -1 | -1 |   |   | X |   | X | X |   |   |   |   |
| SLC31A2    | NM_001860    | 1  | 1  | 0  | -1 | X |   |   |   | X | X |   |   |   |   |
| SLC35F2    | NM_017515    | 1  | 0  | -1 | 0  | X |   |   |   | X | X |   |   |   |   |
| SLC44A3    | NM_152369    | -1 | 1  | 1  | 1  |   |   |   | X |   |   | X | X |   |   |
| SLC6A13    | BC020867     | -1 | -1 | 0  | 0  |   | X |   |   |   |   |   | X |   | X |
| SLC6A13    | NM_016615    | 0  | -1 | 0  | 0  |   | X |   |   |   |   |   | X |   | X |
| SNX5       | NM_014426    | -1 | 0  | 0  | -1 |   | X |   |   |   | X | X |   |   |   |
| SPAG7      | NM_004890    | -1 | -1 | 0  | 0  |   | X | X |   |   |   |   | X |   |   |
| SPEG       | AK055387     | 0  | -1 | 0  | 0  |   | X | X |   |   |   |   |   |   | X |
| ST3GAL2    | AK127322     | 0  | 0  | -1 | 0  |   |   |   |   | X | X |   |   | X |   |
| ST6GALNAC6 | NM_013443    | 0  | 0  | -1 | -1 |   |   | X | X |   | X |   |   |   |   |
| STIM1      | NM_003156    | -1 | -1 | 0  | -1 |   |   |   | X |   |   | X |   | X |   |
| STK11      | NM_000455    | -1 | 0  | -1 | 0  |   |   | X |   |   |   |   | X | X |   |
| STON1      | NM_006873    | -1 | 0  | 0  | 0  |   |   |   |   | X |   | X | X |   |   |
| STXBP5     | NM_139244    | 0  | -1 | 0  | 1  |   | X |   |   | X |   |   | X |   |   |
| SYT5       | NM_003180    | 0  | -1 | 0  | 0  |   |   | X |   |   | X |   |   | X |   |
| TACC2      | NM_206862    | 0  | -1 | -1 | 0  | X |   |   | X | X |   |   |   |   |   |
| TAPBPL     | NM_018009    | 0  | -1 | -1 | 0  | X |   |   | X |   |   | X |   |   |   |
| TBC1D22A   | NM_014346    | 0  | 0  | -1 | -1 | X |   |   | X |   | X |   |   |   |   |
| TBX19      | NM_005149    | -1 | 0  | -1 | -1 | X |   |   |   | X |   |   | X |   |   |
| TCF25      | NM_014972    | -1 | 0  | -1 | 1  |   | X |   |   | X | X |   |   |   |   |
| TCTA       | NM_022171    | -1 | -1 | 1  | 1  | X |   | X |   |   | X |   |   |   |   |
| TEKT4      | NM_144705    | -1 | -1 | -1 | 1  |   |   |   | X |   |   | X | X |   |   |
| TFAP4      | NM_003223    | 0  | -1 | -1 | 0  | X |   | X |   |   |   |   |   | X |   |
| TGFB3      | NM_003239    | -1 | -1 | 0  | 1  |   | X | X |   |   | X |   |   |   |   |
| TGM7       | NM_052955    | 0  | -1 | 1  | 0  |   | X |   |   |   | X |   | X |   |   |
| THOC7      | NM_025075    | -1 | -1 | -1 | -1 |   |   |   |   | X |   | X |   |   | X |
| TLR1       | NM_003263    | 0  | 0  | -1 | 1  |   |   |   |   | X | X | X |   |   |   |
| TM9SF1     | NM_006405    | -1 | 0  | -1 | 1  |   |   | X |   |   |   | X |   | X |   |
| TMCO3      | NM_017905    | 0  | 1  | -1 | -1 | X |   |   |   |   | X |   | X |   |   |
| TMEM101    | NM_032376    | -1 | 1  | -1 | 0  | X |   |   | X | X |   |   |   |   |   |
| TMEM109    | NM_024092    | 0  | 0  | -1 | 0  | X |   |   | X |   | X |   |   |   |   |
| TMEM155    | NM_152399    | 0  | -1 | 0  | -1 | X |   |   |   |   |   | X |   | X |   |
| TMEM37     | NM_183240    | -1 | 0  | -1 | 0  |   |   | X |   |   | X |   | X |   |   |
| TMEM51     | NM_018022    | 0  | 1  | -1 | 0  | X | X |   |   |   |   |   | X |   |   |
| TMEM86A    | NM_153347    | -1 | -1 | 0  | 0  |   |   |   | X | X | X |   |   |   |   |
| TMIE       | NM_147196    | -1 | -1 | -1 | -1 | X |   |   |   |   |   |   | X | X |   |
| TNFRSF1A   | NM_001065    | 1  | 0  | -1 | 0  | X |   |   |   | X |   | X |   |   |   |
| TOR3A      | NM_022371    | 0  | 0  | -1 | 0  | X |   | X |   |   | X |   |   |   |   |
| TP73       | NM_005427    | 1  | -1 | -1 | -1 |   | X |   |   |   |   | X | X |   |   |
| TRABD      | NM_025204    | 1  | -1 | -1 | 0  | X |   |   |   |   |   |   | X | X |   |
| TRAF3IP2   | NM_147686    | -1 | -1 | -1 | 0  | X |   |   | X |   | X |   |   |   |   |
| TRAF7      | NM_032271    | 0  | -1 | -1 | 1  | X |   |   |   |   |   |   |   | X | X |
| TRIM8      | NM_030912    | 0  | 0  | -1 | 1  |   |   | X | X |   |   | X |   |   |   |
| TTYH3      | NM_025250    | 0  | 0  | -1 | 1  |   |   |   |   |   |   | X | X | X |   |
| UCRC       | NM_001003684 | 0  | 0  | -1 | -1 |   |   |   | X | X | X |   |   |   |   |
| UNC5CL     | NM_173561    | -1 | 0  | 0  | -1 |   | X |   |   |   | X |   | X |   |   |
| VASP       | NM_003370    | 1  | 1  | -1 | 0  | X |   |   |   |   |   | X | X |   |   |
| VAV2       | NM_003371    | 1  | 1  | -1 | 1  |   |   | X |   | X |   | X |   |   |   |
| VAV2       | NM_003371    | 1  | 1  | -1 | 1  |   |   | X |   | X |   | X |   |   |   |
| WNK4       | NM_032387    | -1 | 1  | 1  | 0  | X |   | X |   |   |   |   | X |   |   |
| WNK4       | NM_032387    | -1 | 1  | 1  | 0  | X |   | X |   |   |   |   | X |   |   |

|           |              |    |    |    |    |   |   |   |   |   |   |   |   |   |
|-----------|--------------|----|----|----|----|---|---|---|---|---|---|---|---|---|
| WSB2      | NM_018639    | -1 | -1 | -1 | -1 | X |   |   | X |   | X |   |   |   |
| ZBTB20    | NM_015642    | -1 | -1 | -1 | -1 |   | X |   | X |   |   |   | X |   |
| ZBTB20    | BC010934     | -1 | -1 | 0  | 0  |   | X |   | X |   |   |   | X |   |
| ZC3H8     | NM_032494    | -1 | -1 | 1  | 0  |   | X | X |   |   |   |   | X |   |
| ZDHH3     | NM_016598    | 0  | -1 | 0  | -1 |   |   |   |   |   | X | X |   | X |
| ZFAND3    | NM_021943    | -1 | 0  | -1 | -1 | X |   |   |   | X |   | X |   |   |
| ZFP14     | NM_020917    | -1 | 0  | -1 | 0  | X |   |   | X | X |   |   |   |   |
| ZMYND12   | NM_032257    | -1 | 1  | 0  | 0  |   |   |   | X |   | X |   |   | X |
| ZNF138    | NM_006524    | 1  | -1 | -1 | 0  |   |   |   | X | X |   | X |   |   |
| ZNF219    | NM_016423    | 0  | 0  | -1 | 1  | X |   |   |   | X |   |   |   | X |
| ZNF219    | NM_016423    | 0  | 0  | -1 | 1  | X |   |   |   | X |   |   |   | X |
| ZNF396    | AF533251     | -1 | 0  | 1  | -1 |   |   |   | X | X |   |   |   | X |
| ZNF396    | NM_145756    | -1 | 0  | 1  | -1 |   |   |   | X | X |   |   |   | X |
| ZNF425    | NM_001001661 | 0  | 0  | -1 | -1 |   |   |   | X | X |   | X |   |   |
| ZNF575    | NM_174945    | 0  | -1 | -1 | 0  |   |   |   | X | X | X |   |   |   |
| ZNF581    | NM_016535    | 0  | -1 | -1 | 0  | X |   |   | X |   |   |   |   | X |
| ZNF586    | NM_017652    | -1 | 1  | -1 | -1 | X |   |   |   | X |   |   |   | X |
| ZNF747    | NM_023931    | -1 | 0  | -1 | 1  |   |   |   |   | X | X |   |   | X |
| ZNF764    | NM_033410    | 1  | 0  | -1 | 0  |   |   |   |   | X | X |   |   | X |
| ZNF83     | NM_018300    | -1 | 0  | 0  | 0  |   |   |   | X | X |   |   | X |   |
| ZNFX1     | NM_021035    | 1  | 0  | -1 | 1  |   |   |   | X |   | X | X |   |   |
| ZSWIM3    | NM_080752    | -1 | 1  | 0  | 0  |   |   |   | X |   |   | X | X |   |
| ABCA3     | NM_001089    | 1  | -1 | -1 | -1 |   |   |   |   | X |   |   | X |   |
| ABCA7     | NM_019112    | 1  | 0  | -1 | 1  |   |   |   |   | X |   |   |   | X |
| ABHD1     | NM_032604    | -1 | -1 | 0  | 1  |   |   |   | X |   |   | X |   |   |
| ACRBP     | NM_032489    | -1 | 0  | 1  | 0  | X | X |   |   |   |   |   |   |   |
| ADA       | NM_000022    | 0  | 0  | -1 | 0  |   |   |   |   |   | X |   |   | X |
| ADAMTSL5  | NM_213604    | 0  | -1 | -1 | 0  |   |   |   |   |   |   | X |   | X |
| ADHFE1    | NM_144650    | -1 | -1 | 0  | 0  | X |   |   |   |   |   | X |   |   |
| ADM       | NM_001124    | 1  | 1  | -1 | 1  |   |   |   |   |   |   | X |   | X |
| ADORA2B   | NM_000676    | 1  | 0  | -1 | -1 |   |   |   | X |   | X |   |   |   |
| ADPRHL1   | NM_138430    | -1 | -1 | -1 | -1 |   |   |   |   | X |   |   |   | X |
| ADPRHL1   | NM_199162    | -1 | -1 | -1 | -1 |   |   |   |   | X |   |   |   | X |
| ADRB1     | NM_000684    | 1  | 0  | -1 | -1 |   |   | X |   |   |   |   |   | X |
| AES       | NM_198969    | -1 | 0  | -1 | 0  | X |   |   |   | X |   |   |   |   |
| AES       | NM_198970    | -1 | 0  | -1 | 0  | X |   |   |   | X |   |   |   |   |
| AKT1      | NM_005163    | 0  | 0  | -1 | 1  |   |   | X |   |   |   |   | X |   |
| ANG       | NM_001145    | 0  | 1  | -1 | 1  |   |   |   |   |   | X |   | X |   |
| ANKRD22   | NM_144590    | 0  | -1 | -1 | -1 |   |   |   |   | X |   |   |   | X |
| ANKRD23   | NM_144994    | -1 | -1 | 1  | -1 |   |   |   |   |   |   | X | X |   |
| ANKRD54   | NM_138797    | -1 | 0  | 0  | 0  |   |   |   |   |   | X |   |   | X |
| ANPEP     | NM_001150    | 0  | -1 | -1 | 1  |   |   |   | X |   | X |   |   |   |
| ANXA1     | NM_000700    | 0  | 1  | -1 | 0  |   |   |   |   |   | X | X |   |   |
| AP1M2     | NM_005498    | 1  | -1 | -1 | -1 | X |   |   |   |   |   |   |   | X |
| APOBEC3B  | NM_004900    | 0  | 1  | -1 | 0  |   |   |   | X | X |   |   |   |   |
| ARHGAP25  | NM_001007231 | 0  | 1  | -1 | 1  |   |   | X |   |   |   |   | X |   |
| ARHGDIA   | NM_004309    | -1 | 0  | -1 | 0  | X |   |   |   |   | X |   |   |   |
| ARHGDIB   | NM_001175    | 1  | -1 | 0  | 0  |   |   |   | X |   |   |   |   | X |
| ARL6IP5   | NM_006407    | -1 | -1 | -1 | -1 |   |   |   |   |   | X |   |   | X |
| ARL8A     | NM_138795    | -1 | 0  | -1 | -1 |   |   | X | X |   |   |   |   |   |
| ASB6      | NM_017873    | -1 | -1 | 0  | -1 |   |   |   |   |   | X |   |   | X |
| ATN1      | NM_001007026 | -1 | -1 | -1 | 1  |   |   |   | X |   |   |   |   | X |
| ATP6V1G2  | NM_130463    | -1 | 0  | 1  | 0  |   |   |   |   | X | X |   |   |   |
| B3GALT6   | NM_080605    | 0  | -1 | 0  | 0  |   |   |   |   |   |   | X | X |   |
| B3GNT3    | NM_014256    | 0  | -1 | -1 | 0  |   |   |   | X | X |   |   |   |   |
| BAG2      | NM_004282    | -1 | 0  | 0  | 1  | X |   |   |   | X |   |   |   |   |
| BBC3      | NM_014417    | 0  | 0  | -1 | -1 |   |   | X |   |   |   | X |   |   |
| BNIP1     | NM_013978    | -1 | -1 | 0  | -1 |   |   |   |   | X | X |   |   |   |
| BRWD2     | NM_018117    | -1 | -1 | -1 | -1 |   |   |   |   | X |   | X |   |   |
| BTBD2     | NM_017797    | -1 | 0  | -1 | 0  |   |   |   |   |   | X |   |   | X |
| C10orf107 | NM_173554    | 0  | 1  | -1 | 0  |   |   |   |   | X | X |   |   |   |
| C10orf30  | BC031618     | -1 | 0  | 0  | 0  |   |   |   |   |   | X | X |   |   |
| C11orf1   | NM_022761    | -1 | -1 | -1 | -1 |   |   |   | X | X |   |   |   |   |
| C11orf17  | NM_020642    | -1 | 1  | -1 | -1 | X |   |   |   | X |   |   |   |   |
| C11orf63  | NM_024806    | -1 | 0  | 0  | -1 | X |   |   |   | X |   |   |   |   |
| C11orf63  | NM_199124    | -1 | 0  | 0  | -1 | X |   |   |   | X |   |   |   |   |

|          |              |    |    |    |    |   |   |   |   |   |   |   |   |   |   |   |   |
|----------|--------------|----|----|----|----|---|---|---|---|---|---|---|---|---|---|---|---|
| C12orf60 | NM_175874    | 0  | -1 | 0  | -1 |   |   |   |   | X | X |   |   |   |   |   |   |
| C16orf68 | NM_024109    | -1 | 0  | -1 | -1 |   | X |   |   |   | X |   |   |   |   |   |   |
| C1orf53  | NM_001024594 | -1 | -1 | -1 | 1  | X |   |   |   | X |   |   |   |   |   |   |   |
| C1orf83  | NM_153035    | -1 | 0  | 0  | -1 |   |   |   |   | X | X |   |   |   |   |   |   |
| C1orf86  | AF469129     | -1 | -1 | -1 | -1 |   |   |   |   | X |   |   |   | X |   |   |   |
| C21orf2  | NM_004928    | -1 | 0  | -1 | -1 |   |   | X |   |   |   |   |   | X |   |   |   |
| C21orf57 | NM_058181    | -1 | -1 | -1 | -1 |   | X |   |   | X |   |   |   |   |   |   |   |
| C22orf32 | NM_033318    | -1 | 0  | 0  | 0  |   |   | X |   |   | X |   |   |   |   |   |   |
| C2orf55  | NM_207362    | 1  | -1 | -1 | 1  |   | X |   |   | X |   |   |   |   |   |   |   |
| C5orf13  | NM_004772    | 0  | 0  | -1 | 1  |   | X | X |   |   |   |   |   |   |   |   |   |
| C5orf34  | NM_198566    | 0  | -1 | 0  | 1  |   |   |   |   | X |   |   | X |   |   |   |   |
| C6orf70  | NM_018341    | -1 | 0  | -1 | -1 |   | X |   |   | X |   |   |   |   |   |   |   |
| C7orf29  | NM_138434    | 1  | -1 | 0  | 0  |   | X |   |   | X |   |   |   |   |   |   |   |
| C8orf58  | NM_001013842 | 1  | 1  | -1 | 1  |   |   | X |   | X |   |   |   |   |   |   |   |
| C9orf125 | NM_032342    | -1 | 0  | -1 | -1 |   | X |   |   | X |   |   |   |   |   |   |   |
| C9orf5   | NM_032012    | 0  | 0  | -1 | 1  |   |   |   | X |   | X |   |   |   |   |   |   |
| C9orf5   | NM_032012    | 0  | 0  | -1 | 1  |   |   |   | X |   | X |   |   |   |   |   |   |
| CAPN1    | NM_005186    | -1 | -1 | -1 | 0  | X |   |   |   |   |   |   |   |   |   | X |   |
| CAPN3    | NM_000070    | -1 | -1 | 0  | 0  |   |   |   |   | X | X |   |   |   |   |   |   |
| CAPS     | NM_004058    | -1 | -1 | 0  | 1  |   |   |   |   | X |   |   |   |   |   | X |   |
| CCDC102B | NM_024781    | -1 | -1 | 0  | 0  |   |   |   |   | X |   |   | X |   |   |   |   |
| CCDC17   | NM_152500    | -1 | 1  | -1 | 1  |   |   |   |   |   | X | X |   |   |   |   |   |
| CCDC28A  | NM_015439    | -1 | 0  | 1  | -1 | X |   | X |   |   |   |   |   |   |   |   |   |
| CCDC76   | NM_019083    | -1 | -1 | 1  | -1 |   | X | X |   |   |   |   |   |   |   |   |   |
| CCND3    | NM_001760    | -1 | 0  | 0  | 1  | X |   |   |   |   |   |   |   |   | X |   |   |
| CDCA3    | NM_031299    | -1 | 1  | -1 | 1  |   |   |   |   | X | X |   |   |   |   |   |   |
| CDH5     | NM_001795    | 1  | -1 | -1 | 1  |   |   | X |   |   | X |   |   |   |   |   |   |
| CES3     | NM_024922    | -1 | -1 | 1  | 1  | X |   |   |   |   |   |   |   |   |   | X |   |
| CFH      | NM_000186    | -1 | 0  | -1 | 0  |   |   |   | X |   |   |   | X |   |   |   |   |
| CFH      | NM_001014975 | -1 | 0  | -1 | 0  |   |   |   | X |   |   |   | X |   |   |   |   |
| CHST13   | NM_152889    | 1  | 0  | -1 | 0  | X |   |   |   | X |   |   |   |   |   |   |   |
| CIC      | NM_015125    | 1  | 1  | -1 | 1  |   |   |   |   |   | X |   |   |   |   | X |   |
| CIDEA    | NM_198289    | 1  | 1  | -1 | 1  |   |   |   |   | X |   |   |   | X |   |   |   |
| CLEC11A  | NM_002975    | 1  | -1 | -1 | 1  |   |   |   |   | X |   |   |   |   |   | X |   |
| CLEC4A   | NM_016184    | -1 | 0  | 0  | -1 |   |   |   |   | X |   |   |   |   |   |   | X |
| CLN3     | NM_000086    | -1 | -1 | -1 | -1 | X |   | X |   |   |   |   |   |   |   |   |   |
| COL23A1  | NM_173465    | 0  | -1 | 0  | 1  |   |   |   |   |   | X |   |   |   |   | X |   |
| COL4A6   | BC005305     | -1 | 0  | 1  | 1  |   |   |   | X |   |   |   |   |   |   | X |   |
| COL4A6   | NM_033641    | -1 | 1  | 0  | 0  |   |   |   | X |   |   |   |   |   |   | X |   |
| COLEC11  | NM_199235    | 1  | 1  | -1 | 1  | X |   | X |   |   |   |   |   |   |   |   |   |
| CREBL1   | NM_004381    | -1 | 0  | 0  | 1  |   | X |   |   | X |   |   |   |   |   |   |   |
| CROP     | NM_016424    | -1 | 0  | 0  | 0  |   |   |   | X | X |   |   |   |   |   |   |   |
| CRYAB    | NM_001885    | 1  | -1 | -1 | 1  | X |   |   |   |   |   |   | X |   |   |   |   |
| CSNK1G2  | NM_001319    | -1 | 0  | -1 | -1 | X |   |   |   |   | X |   |   |   |   |   |   |
| CTXN1    | NM_206833    | 1  | 0  | -1 | -1 | X |   |   |   |   |   |   |   |   |   |   | X |
| Cxorf56  | NM_022101    | -1 | -1 | 0  | 0  |   |   |   |   |   | X |   |   |   |   | X |   |
| CYB5R2   | NM_016229    | 1  | 0  | -1 | 0  | X | X |   |   |   |   |   |   |   |   |   |   |
| CYP27B1  | NM_000785    | -1 | 0  | -1 | 1  |   |   |   |   | X |   |   |   | X |   |   |   |
| DCAKD    | NM_024819    | -1 | 0  | -1 | 0  | X |   |   |   |   |   |   |   | X |   |   |   |
| DENND1C  | NM_024898    | 1  | -1 | 1  | 1  |   | X | X |   |   |   |   |   |   |   |   |   |
| DHRS12   | NM_024705    | -1 | -1 | -1 | -1 | X |   |   |   |   |   |   | X |   |   |   |   |
| DHRS3    | NM_004753    | 1  | -1 | -1 | -1 |   | X |   |   | X |   |   |   |   |   |   |   |
| DHX34    | D50924       | -1 | 1  | -1 | -1 |   |   |   |   |   |   |   |   | X | X |   |   |
| DMRTA1   | NM_022160    | -1 | 1  | 1  | -1 | X |   |   |   |   |   |   |   |   |   |   | X |
| DNAJC4   | NM_005528    | -1 | -1 | -1 | 0  |   |   |   |   |   | X | X |   |   |   |   |   |
| DRAM     | NM_018370    | 1  | 0  | -1 | -1 | X |   |   |   | X |   |   |   |   |   |   |   |
| DUSP7    | NM_001947    | 0  | 0  | -1 | -1 | X |   |   |   |   | X |   |   |   |   |   |   |
| DZIP1L   | NM_173543    | 0  | 1  | -1 | 1  |   |   |   | X | X |   |   |   |   |   |   |   |
| E4F1     | BC001713     | -1 | 0  | -1 | 0  |   |   |   |   |   | X | X |   |   |   |   |   |
| ECH1     | BC014786     | 0  | 0  | -1 | 0  | X |   |   |   |   |   |   |   | X |   |   |   |
| ECSIT    | NM_016581    | 0  | -1 | -1 | 0  |   |   | X |   |   |   |   |   |   |   | X |   |
| EGFL7    | NM_201446    | 1  | 0  | -1 | 1  |   |   |   |   | X |   |   |   |   |   | X |   |
| ENO3     | NM_001976    | 0  | 1  | -1 | 1  |   |   | X |   |   | X |   |   |   |   |   |   |
| ENTPD6   | NM_001247    | 0  | 0  | -1 | 0  |   | X | X |   |   |   |   |   |   |   |   |   |
| EPHA2    | NM_004431    | 1  | 0  | -1 | 0  | X |   |   | X |   |   |   |   |   |   |   |   |
| EPHB4    | NM_004444    | 0  | 0  | -1 | 1  | X |   |   |   |   | X |   |   |   |   |   |   |

|           |              |    |    |    |    |   |   |   |   |   |   |  |   |   |   |
|-----------|--------------|----|----|----|----|---|---|---|---|---|---|--|---|---|---|
| EPOR      | NM_000121    | -1 | 0  | -1 | -1 |   |   |   |   | X |   |  |   | X |   |
| ERMAP     | NM_001017922 | -1 | -1 | -1 | -1 |   |   |   |   |   | X |  |   | X |   |
| ETV4      | NM_001986    | -1 | 1  | -1 | 1  | X |   | X |   |   |   |  |   |   |   |
| EXOC3     | NM_007277    | -1 | -1 | -1 | 0  |   |   |   |   | X |   |  |   |   | X |
| EXOSC2    | NM_014285    | 0  | 1  | -1 | 0  | X |   | X |   |   |   |  |   |   |   |
| EYA2      | NM_172113    | 0  | -1 | 1  | 0  | X |   |   |   | X |   |  |   |   |   |
| FAM117A   | NM_030802    | -1 | -1 | 0  | -1 | X |   |   |   |   | X |  |   |   |   |
| FAM127B   | NM_001078172 | -1 | 0  | -1 | -1 | X |   |   | X |   |   |  |   |   |   |
| FAM55C    | NM_145037    | -1 | 0  | 0  | -1 |   |   |   |   | X | X |  |   |   |   |
| FAM98C    | NM_174905    | -1 | 0  | -1 | -1 |   |   |   |   | X |   |  |   |   | X |
| FBXO46    | NM_001080469 | 0  | 0  | -1 | 1  |   |   |   |   |   |   |  |   | X | X |
| FCER1G    | NM_004106    | -1 | -1 | -1 | -1 |   |   | X |   |   | X |  |   |   |   |
| FCGRT     | NM_004107    | -1 | 0  | -1 | 0  | X |   | X |   |   |   |  |   |   |   |
| FCN1      | NM_002003    | -1 | -1 | 0  | -1 |   |   |   |   |   | X |  |   |   | X |
| FHIT      | NM_002012    | 0  | -1 | -1 | -1 |   |   | X |   | X |   |  |   |   |   |
| FLJ14213  | NM_024841    | 1  | 0  | -1 | 1  |   | X |   |   | X |   |  |   |   |   |
| FMO4      | NM_002022    | -1 | 0  | -1 | -1 |   |   |   |   | X | X |  |   |   |   |
| FOSL1     | NM_005438    | 0  | 0  | -1 | -1 | X |   |   |   |   |   |  |   |   | X |
| FOXL1     | NM_005250    | 1  | 1  | -1 | 0  |   |   |   |   | X |   |  | X |   |   |
| FOXL2     | NM_023067    | 0  | 0  | 0  | -1 |   |   |   |   | X | X |  |   |   |   |
| FPGT      | NM_003838    | -1 | -1 | 1  | 0  |   |   |   | X | X |   |  |   |   |   |
| FUZ       | NM_025129    | -1 | 1  | -1 | 1  |   | X |   |   | X |   |  |   |   |   |
| FUZ       | NM_025129    | -1 | 1  | -1 | 1  |   | X |   |   | X |   |  |   |   |   |
| FZR1      | NM_016263    | -1 | 1  | -1 | 0  |   |   |   |   |   |   |  |   | X | X |
| GALM      | NM_138801    | -1 | 1  | 1  | -1 |   |   |   |   | X |   |  | X |   |   |
| GBE1      | NM_000158    | -1 | 0  | -1 | 1  |   |   |   |   |   | X |  |   | X |   |
| GCHFR     | NM_005258    | -1 | 1  | 1  | 0  |   | X |   |   |   |   |  |   | X |   |
| GFER      | NM_005262    | 0  | -1 | -1 | 0  | X |   | X |   |   |   |  |   |   |   |
| GGT1      | NM_005265    | 1  | 1  | -1 | -1 |   |   |   |   |   |   |  | X | X |   |
| GIMAP2    | NM_015660    | 0  | -1 | 0  | -1 |   |   |   |   | X |   |  |   |   | X |
| GLDC      | NM_000170    | 1  | -1 | 0  | 1  |   | X |   |   |   |   |  | X |   |   |
| GMPPA     | NM_013335    | -1 | 0  | -1 | -1 |   |   |   |   |   |   |  |   | X | X |
| GNPTAB    | NM_024312    | 1  | -1 | 1  | 1  |   |   |   | X |   |   |  | X |   |   |
| GOLT1A    | NM_198447    | 0  | 0  | -1 | -1 |   |   |   |   | X |   |  | X |   |   |
| GORASP1   | NM_031899    | 0  | -1 | -1 | 0  |   |   | X |   | X |   |  |   |   |   |
| GRAMD1A   | NM_020895    | 0  | 0  | -1 | 0  |   |   |   |   | X |   |  |   |   | X |
| GRID1     | NM_017551    | 0  | 1  | -1 | 0  | X |   |   |   |   |   |  |   |   | X |
| GRIPAP1   | NM_020137    | -1 | 0  | -1 | -1 |   |   |   |   |   |   |  | X | X |   |
| GUCA1B    | NM_002098    | -1 | 0  | 0  | 0  | X |   |   | X |   |   |  |   |   |   |
| HEBP2     | NM_014320    | -1 | 0  | 1  | 0  | X |   |   |   |   | X |  |   |   |   |
| HEXIM1    | NM_006460    | 0  | 1  | -1 | 0  | X |   |   | X |   |   |  |   |   |   |
| HEXIM2    | NM_144608    | -1 | 0  | -1 | 1  |   |   |   |   | X |   |  |   | X |   |
| HEY2      | NM_012259    | 1  | -1 | 1  | 0  |   |   |   |   | X |   |  |   |   | X |
| HGD       | NM_000187    | 1  | -1 | -1 | 0  |   |   |   |   | X |   |  | X |   |   |
| HHLA3     | NM_007071    | -1 | 0  | -1 | -1 | X |   |   |   |   | X |  |   |   |   |
| HIST1H2BD | BQ683489     | 0  | 0  | -1 | -1 |   |   |   |   | X |   |  | X |   |   |
| HLA-DMA   | NM_006120    | 0  | -1 | 1  | 1  |   |   | X |   |   | X |  |   |   |   |
| HM13      | NM_178580    | -1 | -1 | 0  | -1 |   |   |   |   |   | X |  |   |   | X |
| HOXB2     | NM_002145    | 1  | -1 | 0  | 1  |   |   |   |   | X | X |  |   |   |   |
| HOXB4     | NM_024015    | 1  | -1 | -1 | 0  |   |   |   |   | X | X |  |   |   |   |
| HOXB4     | NM_024015    | 1  | -1 | -1 | 0  |   |   |   |   | X | X |  |   |   |   |
| HSD3B7    | NM_025193    | 0  | -1 | -1 | -1 |   |   |   | X |   |   |  |   |   | X |
| ICAM5     | NM_003259    | 1  | 0  | -1 | 1  |   | X |   |   |   | X |  |   |   |   |
| IFNGR2    | NM_005534    | 1  | 0  | -1 | -1 |   |   |   |   |   | X |  |   | X |   |
| IFT20     | NM_174887    | -1 | 0  | 1  | -1 |   |   |   |   | X |   |  |   |   | X |
| IL15RA    | NM_172200    | 1  | -1 | -1 | -1 | X |   |   |   |   | X |  |   |   |   |
| IL27RA    | NM_004843    | 1  | -1 | -1 | 1  |   |   |   |   | X |   |  |   | X |   |
| INPP1     | NM_002194    | 0  | -1 | 0  | -1 |   | X |   |   |   |   |  |   | X |   |
| IQGAP3    | NM_178229    | -1 | -1 | -1 | -1 |   |   | X |   |   |   |  | X |   |   |
| JARID1B   | NM_006618    | 0  | 0  | -1 | 0  |   |   | X |   | X |   |  |   |   |   |
| JUB       | NM_032876    | 0  | 1  | -1 | 0  |   |   |   |   | X | X |  |   |   |   |
| JUP       | NM_002230    | -1 | 0  | 0  | 0  |   |   |   |   | X | X |  |   |   |   |
| KCNIP3    | NM_013434    | 0  | -1 | 1  | 1  |   | X |   |   |   |   |  |   |   | X |
| KCNJ15    | NM_170736    | 0  | -1 | 0  | 1  |   |   |   |   | X | X |  |   |   |   |
| KDELR1    | NM_006801    | 0  | 0  | -1 | 1  | X |   |   |   | X |   |  |   |   |   |
| KHSRP     | NM_003685    | 0  | -1 | -1 | 0  |   |   |   |   | X |   |  | X |   |   |

|           |              |    |    |    |    |   |   |   |   |   |   |   |   |   |
|-----------|--------------|----|----|----|----|---|---|---|---|---|---|---|---|---|
| KIAA0195  | NM_014738    | -1 | 0  | -1 | 1  |   |   | X |   |   |   |   |   | X |
| KLHDC8B   | NM_173546    | -1 | 0  | -1 | 0  | X |   |   |   | X |   |   |   |   |
| KLHL22    | NM_032775    | 0  | 0  | -1 | -1 |   | X |   |   |   |   | X |   |   |
| KRT13     | NM_002274    | 0  | 0  | -1 | -1 |   |   |   |   | X |   |   |   | X |
| KRT15     | NM_002275    | 0  | -1 | -1 | -1 |   |   | X |   | X |   |   |   |   |
| KRT85     | NM_002283    | -1 | -1 | -1 | 0  | X |   |   |   |   |   | X |   |   |
| KRTAP4-7  | BX648343     | -1 | 0  | -1 | -1 |   |   |   | X |   |   | X |   |   |
| KTELC1    | NM_020231    | -1 | -1 | -1 | 0  | X |   |   |   | X |   |   |   |   |
| LGALS3BP  | NM_005567    | 0  | -1 | -1 | 0  |   |   | X |   |   |   | X |   |   |
| LGIA      | NM_139284    | 0  | 1  | -1 | 1  |   |   | X |   |   |   | X |   |   |
| LOC137886 | NM_001077619 | -1 | 0  | 0  | -1 |   |   | X |   | X |   |   |   |   |
| LOC144097 | NM_138471    | 0  | 0  | -1 | 0  | X | X |   |   |   |   |   |   |   |
| LOC285908 | NM_181722    | -1 | -1 | 1  | 1  |   |   | X |   | X |   |   |   |   |
| LRRC41    | NM_006369    | 0  | -1 | -1 | 1  |   |   | X |   |   |   | X |   |   |
| LST1      | NM_007161    | -1 | 0  | -1 | 1  |   |   |   | X |   |   |   |   | X |
| LY6G5C    | NM_001002848 | -1 | -1 | -1 | 0  |   | X |   |   |   |   |   | X |   |
| LYK5      | NM_153335    | -1 | 0  | 0  | 1  |   | X | X |   |   |   |   |   |   |
| MAGED2    | NM_201222    | -1 | 0  | 0  | 0  |   |   |   | X |   |   |   | X |   |
| MAL       | NM_002371    | 1  | -1 | 0  | 0  | X |   |   |   | X |   |   |   |   |
| MAN1B1    | NM_016219    | -1 | 0  | -1 | 0  |   |   | X |   |   |   |   |   | X |
| MAN2A2    | NM_006122    | 1  | 0  | -1 | -1 |   |   |   | X |   |   |   | X |   |
| MAP3K11   | NM_002419    | 0  | -1 | -1 | 1  | X |   |   |   |   | X |   |   |   |
| MAP4K4    | NM_145686    | -1 | 0  | 0  | 0  |   |   |   | X |   |   | X |   |   |
| MAPK12    | NM_002969    | 0  | -1 | -1 | 1  |   |   |   |   | X |   |   | X |   |
| MAPKAPK3  | NM_004635    | 0  | 0  | -1 | -1 | X |   |   | X |   |   |   |   |   |
| MB        | NM_203377    | 0  | -1 | -1 | 1  |   |   | X |   |   |   |   | X |   |
| MCEE      | NM_032601    | -1 | -1 | 1  | 0  |   |   |   | X | X |   |   |   |   |
| ME3       | NM_001014811 | 1  | 0  | -1 | -1 |   |   |   | X |   |   |   | X |   |
| ME3       | NM_001014811 | 1  | 0  | -1 | -1 |   |   |   | X |   |   |   | X |   |
| MEX3A     | AK125482     | -1 | 0  | 0  | 0  |   | X |   |   |   |   |   | X |   |
| MEX3A     | XM_044166    | -1 | 0  | 0  | 0  |   | X |   |   |   |   |   | X |   |
| MGST2     | NM_002413    | -1 | 0  | 1  | 0  |   |   |   | X |   |   |   | X |   |
| MRC2      | NM_006039    | -1 | 1  | -1 | 1  |   |   | X |   |   |   |   | X |   |
| MRPL45    | NM_032351    | -1 | -1 | 0  | -1 |   |   |   |   |   | X |   | X |   |
| MSL3L1    | NM_078629    | -1 | -1 | -1 | -1 |   | X |   |   | X |   |   |   |   |
| MSRA      | NM_012331    | -1 | -1 | -1 | -1 | X |   |   |   |   | X |   |   |   |
| MTA1      | NM_004689    | 0  | 0  | -1 | -1 |   |   |   |   |   | X |   | X |   |
| MYL4      | NM_002476    | 0  | 0  | -1 | 1  |   |   | X |   | X |   |   |   |   |
| NCDN      | NM_014284    | -1 | -1 | 0  | 0  |   |   | X | X |   |   |   |   |   |
| NFE2      | NM_006163    | 1  | -1 | 1  | 1  |   |   | X |   |   |   |   | X |   |
| NFKBIA    | NM_020529    | 1  | 1  | -1 | 0  |   |   |   |   | X |   |   | X |   |
| NFU1      | NM_015700    | -1 | 0  | 0  | -1 |   |   |   |   | X | X |   |   |   |
| NGEF      | NM_019850    | -1 | 1  | 0  | -1 |   |   |   |   |   |   |   | X | X |
| NME5      | NM_003551    | -1 | 0  | 1  | -1 |   |   |   |   | X |   |   | X |   |
| NMI       | NM_004688    | 0  | -1 | -1 | -1 |   |   |   |   | X |   |   | X |   |
| NUP210    | NM_024923    | 0  | -1 | -1 | 1  | X |   | X |   |   |   |   |   |   |
| OBSCN     | NM_052843    | -1 | -1 | 0  | 0  |   |   |   | X |   |   |   |   | X |
| OCA2      | NM_000275    | -1 | 1  | 1  | 0  |   | X |   |   |   |   |   | X |   |
| OSGEP     | NM_017807    | -1 | 0  | 0  | -1 |   |   |   |   | X | X |   |   |   |
| OSR1      | NM_145260    | -1 | -1 | -1 | 0  |   |   |   |   | X | X |   |   |   |
| OXA1L     | NM_005015    | 0  | -1 | -1 | 0  |   |   |   | X | X |   |   |   |   |
| PAPSS1    | NM_005443    | 1  | -1 | 0  | 0  | X |   |   |   |   |   |   | X |   |
| PARP6     | NM_020214    | -1 | 0  | -1 | 0  |   |   | X |   |   |   |   | X |   |
| PCDHB14   | NM_018934    | -1 | 1  | -1 | 0  |   |   |   |   | X | X |   |   |   |
| PCGF1     | NM_032673    | 1  | 1  | -1 | 0  | X |   |   |   |   | X |   |   |   |
| PCGF2     | NM_007144    | 0  | 0  | -1 | -1 | X |   |   |   |   | X |   |   |   |
| PDLIM7    | NM_005451    | -1 | 1  | -1 | 0  | X |   |   |   |   |   |   | X |   |
| PGBD3     | NM_170753    | 0  | 1  | -1 | 0  |   |   |   |   | X |   |   |   | X |
| PHLDB1    | NM_015157    | 0  | 0  | -1 | -1 | X |   |   |   |   | X |   |   |   |
| PIK3R2    | NM_005027    | 0  | -1 | -1 | 0  |   | X |   |   |   |   |   |   | X |
| PIM2      | NM_006875    | 1  | 1  | -1 | 0  |   |   | X |   |   |   |   | X |   |
| PITPNM1   | NM_004910    | 0  | 0  | -1 | 1  |   |   |   |   | X |   |   |   | X |
| PLAU      | NM_002658    | 1  | 1  | -1 | 1  |   |   |   |   | X | X |   |   |   |
| PLAUR     | NM_001005377 | 1  | 1  | -1 | 0  |   |   |   |   | X | X |   |   |   |
| PLD3      | NM_012268    | -1 | -1 | 0  | 0  |   |   |   |   |   | X |   |   | X |
| PLEKHA4   | NM_020904    | -1 | -1 | -1 | 0  |   |   |   |   |   | X | X |   |   |

|            |              |    |    |    |    |   |   |  |   |   |   |   |   |   |   |
|------------|--------------|----|----|----|----|---|---|--|---|---|---|---|---|---|---|
| PMM1       | NM_002676    | -1 | 0  | 0  | -1 |   |   |  |   | X |   | X |   |   |   |
| POPDC2     | NM_022135    | -1 | 0  | 0  | -1 |   |   |  | X |   |   | X |   |   |   |
| PRKDC      | NM_006904    | 0  | -1 | -1 | 0  |   |   |  |   |   |   | X | X |   |   |
| PRMT7      | NM_019023    | 0  | -1 | -1 | -1 | X |   |  |   | X |   |   |   |   |   |
| PSCA       | NM_005672    | -1 | 1  | -1 | 0  |   |   |  | X |   |   |   |   | X |   |
| PTDSS2     | NM_030783    | 0  | 0  | -1 | 0  |   |   |  | X |   |   |   | X |   |   |
| PTPLA      | NM_014241    | -1 | 0  | -1 | 0  |   |   |  |   | X |   | X |   |   |   |
| PTPN9      | NM_002833    | -1 | 0  | -1 | 0  | X |   |  | X |   |   |   |   |   |   |
| PTPRF      | NM_002840    | 1  | 0  | -1 | -1 |   |   |  |   |   |   | X | X |   |   |
| RAB11B     | NM_004218    | -1 | 0  | -1 | 0  |   | X |  |   |   | X |   |   |   |   |
| RAB24      | AF258583     | -1 | -1 | 1  | 0  |   |   |  |   |   |   | X |   | X |   |
| RAB32      | NM_006834    | -1 | 0  | -1 | -1 |   |   |  | X |   |   | X |   |   |   |
| RAB4B      | NM_016154    | -1 | -1 | -1 | -1 |   | X |  |   | X |   |   |   |   |   |
| RAC2       | NM_002872    | 0  | -1 | -1 | 0  |   |   |  |   |   |   |   |   | X | X |
| RAD51L3    | NM_133629    | 0  | 1  | -1 | 0  |   |   |  | X |   | X |   |   |   |   |
| RAD51L3    | NM_002878    | 0  | 1  | -1 | 0  |   |   |  | X |   | X |   |   |   |   |
| RAGE       | NM_014226    | -1 | 1  | 1  | -1 |   | X |  | X |   |   |   |   |   |   |
| RBM23      | NM_018107    | -1 | 0  | -1 | 0  |   |   |  | X |   |   | X |   |   |   |
| REXO1      | NM_020695    | -1 | -1 | -1 | 1  |   |   |  | X |   |   |   |   | X |   |
| RGS9BP     | NM_207391    | 1  | -1 | 0  | 0  |   |   |  | X |   |   | X |   |   |   |
| RHBDL2     | NM_017821    | 0  | -1 | 1  | 0  |   |   |  |   |   |   | X |   |   | X |
| RIN3       | NM_024832    | 0  | 0  | -1 | -1 |   |   |  |   | X |   |   |   | X |   |
| RPH3AL     | NM_006987    | 0  | 0  | -1 | 0  | X |   |  |   | X |   |   |   |   |   |
| RTN4R      | NM_023004    | 1  | -1 | 1  | -1 |   |   |  | X |   |   |   |   | X |   |
| RXRA       | NM_002957    | 0  | -1 | -1 | -1 |   |   |  | X |   |   |   |   | X |   |
| SAMD1      | NM_138352    | 1  | 1  | -1 | 1  |   |   |  |   | X |   |   |   | X |   |
| SBNO2      | NM_014963    | 1  | 1  | -1 | 0  | X |   |  |   |   |   |   |   | X |   |
| SCIN       | NM_033128    | -1 | 0  | 1  | 1  |   |   |  |   | X |   | X |   |   |   |
| SCLY       | NM_016510    | -1 | -1 | 0  | 0  |   |   |  |   |   | X |   |   | X |   |
| SDCCAG8    | NM_006642    | -1 | -1 | 0  | -1 |   |   |  |   | X |   | X |   |   |   |
| SDSL       | NM_138432    | -1 | -1 | 0  | 0  |   |   |  |   | X | X |   |   |   |   |
| SEMA4C     | NM_017789    | 1  | 0  | -1 | 0  |   |   |  | X |   |   | X |   |   |   |
| SEMA6B     | NM_032108    | 1  | 1  | -1 | 1  |   | X |  |   |   |   |   |   | X |   |
| SERINC2    | NM_178865    | -1 | -1 | 0  | 0  | X |   |  |   |   |   |   | X |   |   |
| SERPINH1   | NM_001235    | -1 | -1 | -1 | 0  |   |   |  |   |   | X | X |   |   |   |
| SGCG       | NM_000231    | -1 | 0  | 1  | -1 |   |   |  | X |   | X |   |   |   |   |
| SH3BGR     | NM_007341    | -1 | 0  | 0  | -1 |   |   |  | X |   | X |   |   |   |   |
| SLC16A5    | NM_004695    | -1 | 1  | -1 | 1  | X |   |  |   | X |   |   |   |   |   |
| SLC26A1    | NM_134425    | -1 | 0  | -1 | -1 |   |   |  | X | X |   |   |   |   |   |
| SLC29A1    | NM_004955    | 0  | -1 | -1 | 1  | X |   |  |   | X |   |   |   |   |   |
| SLC35D2    | NM_007001    | -1 | -1 | 0  | -1 |   |   |  |   |   |   |   | X | X |   |
| SLC4A11    | NM_032034    | 1  | -1 | 0  | 0  |   |   |  |   |   | X | X |   |   |   |
| SLC7A3     | NM_032803    | -1 | 1  | 1  | 1  |   |   |  |   | X |   | X |   |   |   |
| SLC9A3R2   | NM_004785    | 0  | -1 | -1 | 0  |   |   |  | X |   |   |   |   | X |   |
| SMAD6      | NM_005585    | 0  | 1  | -1 | 1  |   |   |  | X |   |   |   |   | X |   |
| SNRPN      | NM_022807    | -1 | -1 | -1 | 1  |   |   |  |   |   | X |   |   | X |   |
| SNUPN      | NM_005701    | 0  | 0  | -1 | 1  |   |   |  |   |   |   | X |   | X |   |
| SORCS2     | NM_020777    | 0  | -1 | 1  | 1  |   |   |  | X |   |   |   |   | X |   |
| SOX13      | NM_005686    | 1  | 1  | -1 | -1 |   |   |  |   |   | X |   |   |   | X |
| SPATA20    | NM_022827    | -1 | -1 | -1 | 0  |   |   |  | X |   |   |   | X |   |   |
| SPATA9     | NM_031952    | -1 | 0  | -1 | 0  |   |   |  |   | X | X |   |   |   |   |
| SPR        | NM_003124    | 1  | -1 | -1 | 1  | X |   |  |   |   |   | X |   |   |   |
| SPRR2D     | NM_006945    | -1 | 0  | 0  | -1 |   |   |  |   |   | X |   |   | X |   |
| ST3GAL3    | NM_174963    | -1 | 0  | -1 | -1 |   |   |  | X |   |   | X |   |   |   |
| ST3GAL4    | NM_006278    | 0  | 1  | -1 | -1 |   | X |  |   |   | X |   |   |   |   |
| ST6GALNAC2 | NM_006456    | 1  | 1  | -1 | 1  |   |   |  |   |   |   | X | X |   |   |
| ST6GALNAC2 | BC038114     | 0  | 0  | -1 | -1 |   |   |  |   |   |   | X | X |   |   |
| ST7        | NM_018412    | -1 | -1 | 0  | 0  |   |   |  | X |   | X |   |   |   |   |
| STRC       | NM_153700    | -1 | -1 | 0  | 0  |   |   |  | X |   |   | X |   |   |   |
| SULT1A1    | NM_177529    | -1 | -1 | 0  | -1 |   |   |  |   |   |   |   | X | X |   |
| SVEP1      | NM_153366    | 0  | 1  | -1 | 1  |   |   |  |   | X |   |   | X |   |   |
| SYT15      | NM_181519    | -1 | 1  | -1 | -1 |   |   |  | X |   |   |   | X |   |   |
| SYT15      | AK131036     | -1 | 0  | -1 | 0  |   |   |  | X |   |   |   | X |   |   |
| SYTL3      | NM_001009991 | 0  | -1 | 0  | 0  |   |   |  |   | X |   |   |   | X |   |
| TARSL2     | NM_152334    | -1 | -1 | 1  | 0  |   |   |  | X |   |   | X |   |   |   |
| TBC1D19    | NM_018317    | -1 | 0  | 0  | 0  |   |   |  |   |   |   | X |   | X |   |

|           |              |    |    |    |    |   |   |   |   |   |   |   |   |   |   |
|-----------|--------------|----|----|----|----|---|---|---|---|---|---|---|---|---|---|
| TBX6      | NM_080758    | -1 | -1 | -1 | -1 |   |   |   |   |   |   |   | X | X |   |
| TCEA2     | NM_003195    | -1 | 0  | -1 | 0  |   |   |   |   |   |   |   |   | X | X |
| TCF3      | NM_003200    | 0  | 0  | -1 | 0  | X |   |   |   |   |   |   | X |   |   |
| TEAD2     | NM_003598    | 0  | 0  | -1 | 1  |   |   |   |   |   |   | X |   | X |   |
| TGFB11    | NM_015927    | -1 | -1 | -1 | 1  |   |   | X |   |   |   |   |   | X |   |
| TGM1      | NM_000359    | -1 | 1  | -1 | 0  |   | X |   |   |   |   |   | X |   |   |
| TIRAP     | NM_148910    | 0  | 0  | -1 | 0  |   |   | X |   |   |   | X |   |   |   |
| TMCO7     | AB051533     | 1  | -1 | -1 | -1 |   |   | X | X |   |   |   |   |   |   |
| TMED4     | AK074557     | 0  | -1 | -1 | 0  |   |   |   | X | X |   |   |   |   |   |
| TMEM140   | NM_018295    | -1 | 0  | -1 | -1 |   |   |   |   | X | X |   |   |   |   |
| TMEM156   | NM_024943    | -1 | -1 | 0  | -1 |   |   | X | X |   |   |   |   |   |   |
| TMEM17    | NM_198276    | -1 | 0  | 0  | 0  |   |   |   |   |   |   | X | X |   |   |
| TMEM80    | NM_174940    | 0  | 0  | -1 | 1  | X |   |   |   |   |   |   |   | X |   |
| TMEM9     | NM_016456    | -1 | 0  | -1 | 1  |   |   | X |   |   |   | X |   |   |   |
| TMEM9B    | NM_020644    | -1 | -1 | -1 | 1  |   |   |   |   |   |   | X |   | X |   |
| TMUB2     | NM_177441    | -1 | 0  | -1 | 0  |   |   | X |   |   |   |   | X |   |   |
| TMUB2     | NM_024107    | -1 | 0  | -1 | 0  |   |   | X |   |   |   |   | X |   |   |
| TNFRSF11B | NM_002546    | -1 | 0  | 0  | 1  | X |   |   | X |   |   |   |   |   |   |
| TNFSF10   | NM_003810    | 0  | 1  | -1 | 1  |   |   |   | X | X |   |   |   |   |   |
| TNIP1     | NM_006058    | 0  | -1 | -1 | 0  |   |   |   |   |   |   |   |   | X | X |
| TP53I11   | AF010315     | 0  | -1 | -1 | 1  |   |   | X |   |   |   |   | X |   |   |
| TRAP1     | NM_016292    | 0  | -1 | -1 | 0  |   |   |   |   | X | X |   |   |   |   |
| TRIM22    | NM_006074    | 0  | -1 | -1 | 1  | X |   | X |   |   |   |   |   |   |   |
| TRIM34    | NM_130390    | -1 | -1 | 0  | -1 |   |   |   | X |   |   | X |   |   |   |
| TRPM2     | NM_001001188 | 1  | 0  | -1 | 1  |   |   | X |   |   |   |   |   | X |   |
| TSR2      | NM_058163    | -1 | 0  | 0  | 0  |   |   |   |   |   |   | X |   | X |   |
| TTC32     | NM_001008237 | 0  | -1 | 0  | 1  |   |   |   |   |   |   | X |   |   | X |
| TTYH2     | NM_032646    | -1 | 0  | 0  | 0  |   |   |   |   |   | X | X |   |   |   |
| USP36     | AK022913     | -1 | 0  | -1 | 0  | X |   |   |   | X |   |   |   |   |   |
| VAMP8     | NM_003761    | -1 | -1 | 0  | 0  | X |   | X |   |   |   |   |   |   |   |
| VILL      | NM_015873    | 0  | -1 | -1 | 0  |   |   | X |   |   |   | X |   |   |   |
| XPNPEP2   | NM_003399    | 0  | -1 | -1 | -1 |   |   |   | X |   |   | X |   |   |   |
| ZBTB41    | NM_194314    | -1 | 0  | 1  | 0  |   |   |   |   |   | X | X |   |   |   |
| ZDHHC18   | NM_032283    | 0  | 0  | -1 | 0  |   |   |   |   |   | X |   | X |   |   |
| ZFAND2A   | NM_182491    | -1 | 1  | 0  | 1  | X |   |   |   | X |   |   |   |   |   |
| ZNF133    | NM_003434    | -1 | -1 | -1 | 0  |   | X |   |   |   |   |   | X |   |   |
| ZNF146    | NM_007145    | -1 | 1  | 0  | 0  |   |   |   | X | X |   |   |   |   |   |
| ZNF179    | NM_007148    | -1 | 1  | -1 | -1 |   |   |   | X | X |   |   |   |   |   |
| ZNF193    | NM_006299    | -1 | 0  | 0  | 0  | X |   |   |   | X |   |   |   |   |   |
| ZNF222    | NM_013360    | -1 | 1  | 1  | -1 |   |   |   |   | X | X |   |   |   |   |
| ZNF222    | NM_013360    | -1 | 1  | 1  | -1 |   |   |   |   | X | X |   |   |   |   |
| ZNF323    | NM_030899    | -1 | 0  | -1 | 0  |   | X |   |   |   | X |   |   |   |   |
| ZNF397    | NM_032347    | -1 | 0  | 1  | -1 |   |   |   |   | X |   |   | X |   |   |
| ZNF414    | NM_032370    | 0  | 0  | -1 | 1  | X |   |   |   | X |   |   |   |   |   |
| ZNF419    | NM_024691    | -1 | 0  | 1  | 0  | X |   |   |   |   |   |   |   | X |   |
| ZNF452    | NM_052923    | -1 | 0  | 1  | 0  |   |   |   | X |   | X |   |   |   |   |
| ZNF500    | AB011129     | -1 | 0  | -1 | 0  | X |   | X |   |   |   |   |   |   |   |
| ZYX       | NM_003461    | 1  | 1  | -1 | 1  |   |   | X |   |   |   |   |   | X |   |
| ABBA-1    | NM_138383    | 1  | 0  | -1 | 0  |   |   |   | X |   |   |   |   |   |   |
| ABHD14A   | NM_015407    | 0  | -1 | -1 | 1  |   |   |   |   | X |   |   |   |   |   |
| ACCN2     | NM_020039    | 0  | -1 | 0  | 0  |   |   |   |   |   | X |   |   |   |   |
| ACOX3     | NM_003501    | 0  | 0  | -1 | -1 |   | X |   |   |   |   |   |   |   |   |
| ACTA2     | NM_001613    | 0  | -1 | -1 | 1  | X |   |   |   |   |   |   |   |   |   |
| ADFP      | NM_001122    | -1 | 1  | -1 | 0  |   |   |   |   |   | X |   |   |   |   |
| ADORA1    | NM_000674    | 0  | -1 | -1 | -1 |   |   | X |   |   |   |   |   |   |   |
| AGXT2L2   | NM_153373    | -1 | -1 | 0  | -1 |   |   |   |   | X |   |   |   |   |   |
| ALKBH7    | NM_032306    | 1  | -1 | -1 | 0  |   |   |   |   |   | X |   |   |   |   |
| AMY1C     | NM_001008219 | -1 | -1 | 1  | 0  |   |   |   |   | X |   |   |   |   |   |
| ANKRD13B  | NM_152345    | 0  | 0  | -1 | 0  |   |   |   |   |   |   |   |   | X |   |
| AP1G2     | NM_003917    | -1 | -1 | -1 | 0  | X |   |   |   |   |   |   |   |   |   |
| AP3M2     | NM_006803    | -1 | 0  | -1 | 0  |   |   |   |   | X |   |   |   |   |   |
| APOBEC3H  | NM_181773    | 1  | -1 | -1 | 1  |   |   |   |   | X |   |   |   |   |   |
| APOL3     | NM_145641    | 1  | 1  | -1 | 0  |   |   |   |   |   |   | X |   |   |   |
| ARHGEF19  | NM_153213    | 0  | 0  | -1 | -1 |   |   |   |   |   |   |   | X |   |   |
| ARL2      | NM_001667    | 0  | 0  | -1 | 0  |   |   |   |   |   |   |   |   | X |   |
| ARL3      | NM_004311    | -1 | 0  | 0  | 0  |   |   |   |   | X |   |   |   |   |   |



|           |              |    |    |    |    |   |   |   |   |   |   |   |   |  |   |   |   |
|-----------|--------------|----|----|----|----|---|---|---|---|---|---|---|---|--|---|---|---|
| ARPC1B    | NM_005720    | 0  | -1 | -1 | -1 |   |   |   |   |   |   |   |   |  |   |   | X |
| ARPC4     | NM_005718    | 1  | 0  | -1 | 0  |   |   |   |   |   |   |   |   |  |   | X |   |
| ASS1      | NM_054012    | -1 | 0  | -1 | 0  |   |   |   | X |   |   |   |   |  |   |   |   |
| AVEN      | NM_020371    | 0  | 0  | -1 | -1 |   |   |   |   |   | X |   |   |  |   |   |   |
| AXIN1     | NM_003502    | 1  | 0  | -1 | -1 | X |   |   |   |   |   |   |   |  |   |   |   |
| BCAR3     | NM_003567    | 1  | 0  | -1 | 0  |   |   |   |   |   | X |   |   |  |   |   |   |
| BCL7C     | NM_004765    | -1 | -1 | -1 | -1 |   |   |   |   |   |   |   | X |  |   |   |   |
| BEX2      | NM_032621    | -1 | 0  | 1  | -1 | X |   |   |   |   |   |   |   |  |   |   |   |
| BHLHB3    | NM_030762    | 1  | 0  | -1 | -1 |   |   |   |   |   | X |   |   |  |   |   |   |
| BTBD14B   | NM_052876    | 0  | 0  | -1 | -1 | X |   |   |   |   |   |   |   |  |   |   |   |
| C10orf10  | NM_007021    | -1 | 1  | 1  | 1  |   |   |   |   |   |   |   | X |  |   |   |   |
| C10orf104 | NM_173473    | -1 | 0  | -1 | -1 |   |   |   |   |   | X |   |   |  |   |   |   |
| C10orf38  | NM_001010924 | -1 | 0  | -1 | -1 |   |   |   |   |   | X |   |   |  |   |   |   |
| C11orf35  | NM_173573    | -1 | 0  | -1 | -1 |   |   |   |   |   |   |   |   |  |   |   | X |
| C11orf74  | NM_138787    | -1 | 0  | 0  | -1 |   |   |   |   | X |   |   |   |  |   |   |   |
| C12orf59  | NM_153022    | -1 | 0  | -1 | 0  |   |   |   |   |   | X |   |   |  |   |   |   |
| C18orf17  | BC032684     | 0  | -1 | 0  | 1  |   | X |   |   |   |   |   |   |  |   |   |   |
| C18orf17  | NM_153211    | 0  | -1 | 0  | 1  |   | X |   |   |   |   |   |   |  |   |   |   |
| C19orf24  | NM_017914    | 1  | 0  | -1 | -1 |   |   |   |   |   |   |   |   |  | X |   |   |
| C19orf25  | NM_152482    | 0  | 1  | -1 | 0  |   |   |   |   |   |   |   |   |  |   | X |   |
| C19orf61  | NM_019108    | -1 | 1  | -1 | -1 |   |   |   |   |   | X |   |   |  |   |   |   |
| C1orf162  | NM_174896    | -1 | 0  | 0  | -1 |   |   |   |   |   |   | X |   |  |   |   |   |
| C21orf34  | NM_001005732 | -1 | 0  | 1  | 1  |   |   |   |   |   | X |   |   |  |   |   |   |
| C22orf25  | CR627452     | -1 | 0  | -1 | -1 |   |   | X |   |   |   |   |   |  |   |   |   |
| C2orf34   | NM_024766    | -1 | -1 | 0  | 0  |   |   |   | X |   |   |   |   |  |   |   |   |
| C2orf52   | NM_173513    | -1 | -1 | 0  | -1 |   |   |   |   |   |   | X |   |  |   |   |   |
| C3        | NM_000064    | 0  | -1 | -1 | 0  |   |   |   |   |   |   |   | X |  |   |   |   |
| C6orf134  | NM_024909    | -1 | 0  | 0  | 0  |   |   |   |   |   | X |   |   |  |   |   |   |
| C6orf151  | NM_152551    | -1 | 0  | 1  | 0  |   |   |   |   |   |   | X |   |  |   |   |   |
| C6orf65   | NM_152731    | -1 | 0  | 1  | 0  |   |   |   |   |   | X |   |   |  |   |   |   |
| C8orf13   | NM_053279    | 0  | -1 | 0  | -1 |   | X |   |   |   |   |   |   |  |   |   |   |
| C8orf40   | NM_138436    | -1 | 0  | -1 | -1 |   |   |   |   |   |   | X |   |  |   |   |   |
| C9orf150  | NM_203403    | 0  | 1  | 0  | -1 |   |   |   |   |   |   | X |   |  |   |   |   |
| C9orf167  | NM_017723    | 0  | 1  | -1 | -1 |   |   |   |   |   | X |   |   |  |   |   |   |
| C9orf86   | NM_024718    | 0  | -1 | -1 | -1 |   |   |   |   |   | X |   |   |  |   |   |   |
| CALR3     | NM_145046    | -1 | 0  | -1 | -1 |   |   |   |   |   |   |   | X |  |   |   |   |
| CAMSAP1L1 | NM_203459    | -1 | 0  | 1  | 1  |   | X |   |   |   |   |   |   |  |   |   |   |
| CBR3      | NM_001236    | 1  | -1 | -1 | 1  |   |   |   |   |   | X |   |   |  |   |   |   |
| CCDC101   | NM_138414    | -1 | -1 | -1 | -1 |   |   |   |   |   |   |   |   |  |   |   | X |
| CCDC22    | NM_014008    | 1  | -1 | -1 | -1 | X |   |   |   |   |   |   |   |  |   |   |   |
| CCDC46    | NM_145036    | -1 | 0  | 1  | 0  |   |   | X |   |   |   |   |   |  |   |   |   |
| CCDC53    | NM_016053    | -1 | 0  | 0  | 0  |   |   |   |   |   |   |   |   |  |   | X |   |
| CCDC78    | NM_173476    | 1  | -1 | -1 | 1  |   |   |   |   |   |   |   |   |  |   | X |   |
| CD14      | NM_000591    | 0  | -1 | 0  | 0  |   |   |   |   |   |   | X |   |  |   |   |   |
| CD70      | NM_001252    | 0  | 0  | -1 | 1  |   |   |   |   |   |   |   |   |  |   |   | X |
| CD99      | NM_002414    | -1 | -1 | -1 | 0  |   |   |   |   | X |   |   |   |  |   |   |   |
| CEBPE     | NM_001805    | -1 | 1  | -1 | -1 |   |   |   |   |   |   |   | X |  |   |   |   |
| CENTD2    | NM_139181    | 0  | 0  | -1 | -1 |   |   |   |   |   | X |   |   |  |   |   |   |
| CEP110    | NM_007018    | -1 | 0  | 0  | 0  |   |   |   |   |   | X |   |   |  |   |   |   |
| CFHR1     | NM_002113    | -1 | 0  | 0  | 0  |   |   |   |   |   |   |   | X |  |   |   |   |
| COMT      | NM_000754    | -1 | -1 | -1 | 0  |   |   |   |   |   |   | X |   |  |   |   |   |
| COX15     | NM_078470    | 0  | -1 | -1 | 1  |   |   |   |   |   | X |   |   |  |   |   |   |
| CRYL1     | NM_015974    | -1 | 1  | 0  | -1 |   |   |   |   |   |   |   |   |  | X |   |   |
| CSPG5     | NM_006574    | 1  | -1 | 0  | 1  |   |   |   |   |   |   |   | X |  |   |   |   |
| CTBP1     | NM_001012614 | 0  | 0  | -1 | -1 | X |   |   |   |   |   |   |   |  |   |   |   |
| CUEDC2    | NM_024040    | -1 | 0  | -1 | 0  |   |   |   |   |   | X |   |   |  |   |   |   |
| CUL7      | NM_014780    | -1 | 0  | -1 | 1  |   |   |   |   |   |   |   | X |  |   |   |   |
| CYBASC3   | NM_153611    | -1 | 0  | -1 | 0  |   |   | X |   |   |   |   |   |  |   |   |   |
| CYP27A1   | NM_000784    | 0  | 1  | -1 | -1 | X |   |   |   |   |   |   |   |  |   |   |   |
| DEAF1     | NM_021008    | 0  | -1 | -1 | -1 | X |   |   |   |   |   |   |   |  |   |   |   |
| DGCR6     | NM_005675    | -1 | 0  | 0  | -1 |   |   |   |   |   | X |   |   |  |   |   |   |
| DGCR6L    | NM_033257    | -1 | 0  | 0  | -1 |   |   |   |   |   |   |   |   |  |   |   | X |
| DHRS9     | NM_005771    | 1  | -1 | 0  | 1  |   |   |   |   |   | X |   |   |  |   |   |   |
| DHX37     | NM_032656    | 1  | 0  | -1 | 1  |   |   | X |   |   |   |   |   |  |   |   |   |
| DIRC1     | NM_052952    | 0  | -1 | -1 | 0  |   |   |   |   |   | X |   |   |  |   |   |   |
| DISP1     | NM_032890    | -1 | 0  | 0  | 0  |   |   |   |   |   |   | X |   |  |   |   |   |



|           |              |    |    |    |    |   |   |   |  |   |   |   |  |   |  |  |  |   |   |
|-----------|--------------|----|----|----|----|---|---|---|--|---|---|---|--|---|--|--|--|---|---|
| IRF5      | NM_002200    | 0  | -1 | -1 | -1 |   |   |   |  |   |   |   |  |   |  |  |  | X |   |
| IRX3      | NM_024336    | 1  | -1 | -1 | 0  |   |   |   |  |   |   | X |  |   |  |  |  |   |   |
| ITGA2B    | NM_000419    | -1 | 0  | 0  | 1  |   |   |   |  |   |   |   |  |   |  |  |  |   | X |
| ITIH4     | NM_002218    | -1 | 0  | 0  | -1 |   |   |   |  |   |   |   |  |   |  |  |  |   | X |
| JARID1C   | NM_004187    | 1  | 1  | -1 | 1  |   |   | X |  |   |   |   |  |   |  |  |  |   |   |
| JMJD2C    | NM_015061    | 0  | -1 | 0  | 0  |   |   |   |  |   | X |   |  |   |  |  |  |   |   |
| KCNG1     | NM_002237    | -1 | 1  | 0  | 0  |   |   |   |  |   |   | X |  |   |  |  |  |   |   |
| KCNN4     | NM_002250    | 1  | 0  | -1 | -1 |   |   |   |  |   |   | X |  |   |  |  |  |   |   |
| KEAP1     | NM_203500    | 1  | 0  | -1 | 0  |   |   |   |  |   |   |   |  |   |  |  |  |   | X |
| KIAA0090  | NM_015047    | 0  | -1 | -1 | 1  |   |   |   |  |   | X |   |  |   |  |  |  |   |   |
| KIAA0090  | BX648708     | -1 | 0  | -1 | -1 |   |   |   |  |   | X |   |  |   |  |  |  |   |   |
| KIAA0265  | D87454       | 0  | -1 | 0  | 0  |   |   |   |  |   |   | X |  |   |  |  |  |   |   |
| KIAA0423  | NM_015091    | -1 | 0  | 0  | 0  |   |   |   |  |   |   | X |  |   |  |  |  |   |   |
| KRTAP1-1  | NM_030967    | 0  | 0  | -1 | -1 |   |   |   |  |   |   | X |  |   |  |  |  |   |   |
| KRTAP5-8  | NM_021046    | 1  | -1 | -1 | 0  |   |   |   |  |   |   |   |  |   |  |  |  |   | X |
| L3MBTL2   | AK057177     | -1 | 0  | -1 | -1 |   | X |   |  |   |   |   |  |   |  |  |  |   |   |
| LASS4     | NM_024552    | 0  | -1 | -1 | 1  | X |   |   |  |   |   |   |  |   |  |  |  |   |   |
| LAT       | NM_014387    | -1 | 0  | -1 | 0  |   |   |   |  |   |   |   |  |   |  |  |  |   | X |
| LBX2      | NM_001009812 | -1 | -1 | -1 | -1 |   |   |   |  |   |   |   |  |   |  |  |  |   | X |
| LCAT      | NM_000229    | -1 | 1  | -1 | 0  |   |   |   |  |   |   |   |  |   |  |  |  |   | X |
| LEAP2     | NM_052971    | -1 | 0  | 1  | -1 |   |   |   |  |   |   | X |  |   |  |  |  |   |   |
| LMO1      | NM_002315    | 0  | -1 | 1  | -1 |   |   |   |  |   |   |   |  |   |  |  |  |   | X |
| LOC134145 | NM_199133    | 0  | 0  | -1 | -1 |   |   | X |  |   |   |   |  |   |  |  |  |   |   |
| LOC643641 | AB011115     | -1 | 0  | -1 | -1 |   | X |   |  |   |   |   |  |   |  |  |  |   |   |
| LOC751071 | NM_001043229 | 1  | 0  | -1 | 0  |   |   |   |  | X |   |   |  |   |  |  |  |   |   |
| LOC81691  | NM_030941    | -1 | 0  | 0  | 1  |   |   |   |  |   |   |   |  |   |  |  |  |   | X |
| LOC90379  | NM_138353    | 1  | 1  | -1 | 1  |   |   |   |  |   | X |   |  |   |  |  |  |   |   |
| LOC93349  | NM_138402    | 0  | -1 | -1 | 0  |   |   |   |  |   |   |   |  |   |  |  |  |   | X |
| LOXL2     | NM_002318    | -1 | 0  | -1 | 0  |   |   | X |  |   |   |   |  |   |  |  |  |   |   |
| LRFN4     | NM_024036    | 1  | 0  | -1 | 0  |   |   |   |  | X |   |   |  |   |  |  |  |   |   |
| LRRC23    | NM_006992    | -1 | 0  | 0  | -1 |   |   |   |  |   |   | X |  |   |  |  |  |   |   |
| LRRC61    | NM_023942    | 0  | -1 | -1 | 0  |   |   |   |  |   |   |   |  |   |  |  |  |   | X |
| LRSAM1    | NM_138361    | -1 | -1 | -1 | 1  |   |   |   |  |   |   |   |  |   |  |  |  |   | X |
| LY96      | NM_015364    | -1 | -1 | 1  | -1 |   |   | X |  |   |   |   |  |   |  |  |  |   |   |
| LYPLA2    | NM_007260    | 0  | 0  | -1 | 0  |   |   |   |  | X |   |   |  |   |  |  |  |   |   |
| MAGED4    | NM_030801    | -1 | 0  | -1 | 1  |   |   | X |  |   |   |   |  |   |  |  |  |   |   |
| MAMDC4    | NM_206920    | -1 | 0  | -1 | 0  |   |   |   |  |   |   |   |  |   |  |  |  |   | X |
| MAP3K6    | NM_004672    | 1  | 0  | -1 | 1  | X |   |   |  |   |   |   |  |   |  |  |  |   |   |
| MAP3K6    | NM_004672    | 1  | 0  | -1 | 1  | X |   |   |  |   |   |   |  |   |  |  |  |   |   |
| MBD3      | NM_003926    | -1 | 1  | -1 | 1  | X |   |   |  |   |   |   |  |   |  |  |  |   |   |
| MF12      | NM_005929    | -1 | -1 | -1 | 0  |   |   |   |  |   |   |   |  |   |  |  |  |   | X |
| MF12      | NM_033316    | 0  | -1 | -1 | 0  |   |   |   |  |   |   |   |  |   |  |  |  |   | X |
| MGAT4B    | NM_054013    | 0  | 0  | -1 | -1 |   |   | X |  |   |   |   |  |   |  |  |  |   |   |
| MGAT5B    | NM_144677    | 0  | 0  | -1 | 0  |   |   |   |  |   |   |   |  |   |  |  |  |   | X |
| MOSC1     | NM_022746    | 1  | -1 | 0  | 1  |   |   |   |  |   |   | X |  |   |  |  |  |   |   |
| MRRM1     | NM_024864    | 1  | 0  | -1 | 1  |   |   |   |  |   |   |   |  |   |  |  |  |   | X |
| MRPL54    | NM_172251    | 0  | 0  | -1 | -1 |   |   |   |  |   |   |   |  |   |  |  |  |   | X |
| MSL2L1    | NM_018133    | 0  | 1  | -1 | 0  |   |   |   |  |   |   | X |  |   |  |  |  |   |   |
| MUSTN1    | NM_205853    | -1 | 0  | -1 | 0  |   |   | X |  |   |   |   |  |   |  |  |  |   |   |
| MUTYH     | NM_012222    | 0  | 0  | -1 | 1  |   |   |   |  |   |   | X |  |   |  |  |  |   |   |
| MUTYH     | NM_001048173 | 0  | 0  | -1 | 0  |   |   |   |  |   |   | X |  |   |  |  |  |   |   |
| MYOM1     | NM_003803    | 0  | 1  | -1 | 1  |   |   |   |  |   |   |   |  | X |  |  |  |   |   |
| MYST4     | NM_012330    | 0  | 0  | -1 | 0  |   |   |   |  | X |   |   |  |   |  |  |  |   |   |
| NAPRT1    | NM_145201    | 0  | -1 | -1 | 0  |   |   | X |  |   |   |   |  |   |  |  |  |   |   |
| NBEAL2    | AK131104     | 1  | -1 | -1 | 0  |   |   |   |  |   |   |   |  |   |  |  |  |   | X |
| NEK8      | NM_178170    | 0  | -1 | -1 | -1 |   |   |   |  |   | X |   |  |   |  |  |  |   |   |
| NFKB1B    | NM_001001716 | -1 | 1  | -1 | 0  |   |   |   |  |   |   | X |  |   |  |  |  |   |   |
| NME3      | NM_002513    | -1 | -1 | -1 | 1  |   |   |   |  |   | X |   |  |   |  |  |  |   |   |
| NOB1      | NM_014062    | 0  | -1 | -1 | 0  |   |   |   |  |   |   |   |  |   |  |  |  |   | X |
| NOL3      | NM_003946    | 0  | -1 | -1 | 0  |   |   |   |  |   |   | X |  |   |  |  |  |   |   |
| NPB       | NM_148896    | -1 | 1  | -1 | 1  |   |   |   |  |   |   | X |  |   |  |  |  |   |   |
| NR1H2     | NM_007121    | -1 | 1  | -1 | 0  |   |   | X |  |   |   |   |  |   |  |  |  |   |   |
| NRSN2     | NM_024958    | -1 | 0  | -1 | 1  |   |   | X |  |   |   |   |  |   |  |  |  |   |   |
| NUCB1     | NM_006184    | 0  | -1 | -1 | 1  |   |   |   |  |   |   |   |  | X |  |  |  |   |   |
| NUDT8     | NM_181843    | 0  | 0  | -1 | 1  |   |   |   |  |   |   |   |  |   |  |  |  |   | X |
| OBFC2A    | NM_001031716 | 1  | -1 | 1  | 0  |   |   |   |  |   |   |   |  | X |  |  |  |   |   |

|              |              |    |    |    |    |   |  |   |   |   |   |   |  |  |  |  |  |  |   |
|--------------|--------------|----|----|----|----|---|--|---|---|---|---|---|--|--|--|--|--|--|---|
| OBFC2A       | NM_001031716 | 1  | -1 | 1  | 0  |   |  |   |   |   | X |   |  |  |  |  |  |  |   |
| OFD1         | NM_003611    | -1 | -1 | 1  | 0  |   |  |   |   | X |   |   |  |  |  |  |  |  |   |
| OLFML3       | NM_020190    | -1 | 1  | -1 | 0  |   |  | X |   |   |   |   |  |  |  |  |  |  |   |
| OLFML3       | NM_020190    | -1 | 1  | -1 | 0  |   |  | X |   |   |   |   |  |  |  |  |  |  |   |
| OR10A4       | NM_207186    | -1 | -1 | 0  | -1 |   |  |   |   |   |   |   |  |  |  |  |  |  | X |
| OSGIN1       | NM_013370    | 0  | -1 | -1 | -1 |   |  |   |   |   |   | X |  |  |  |  |  |  |   |
| P2RX4        | NM_002560    | -1 | -1 | -1 | -1 |   |  |   |   | X |   |   |  |  |  |  |  |  |   |
| PANK4        | NM_018216    | 1  | 0  | -1 | 0  |   |  |   |   |   |   | X |  |  |  |  |  |  |   |
| PAQR6        | NM_024897    | -1 | 0  | 0  | 1  |   |  |   |   |   | X |   |  |  |  |  |  |  |   |
| PARP3        | NM_001003935 | -1 | -1 | -1 | 0  |   |  |   |   |   |   | X |  |  |  |  |  |  |   |
| PDCL3        | NM_024065    | -1 | 0  | 0  | 0  |   |  |   |   |   |   |   |  |  |  |  |  |  | X |
| PDGFRL       | NM_006207    | -1 | -1 | -1 | 1  |   |  |   |   |   |   |   |  |  |  |  |  |  | X |
| PGLYRP3      | NM_052891    | -1 | -1 | 0  | -1 |   |  |   |   |   |   |   |  |  |  |  |  |  | X |
| PHB          | NM_002634    | -1 | -1 | 0  | 0  |   |  |   |   |   |   | X |  |  |  |  |  |  |   |
| PHF11        | NM_001040443 | -1 | -1 | -1 | -1 |   |  |   |   | X |   |   |  |  |  |  |  |  |   |
| PHYH         | NM_006214    | -1 | -1 | -1 | 0  |   |  |   |   |   |   | X |  |  |  |  |  |  |   |
| PICK1        | NM_012407    | -1 | -1 | -1 | 0  | X |  |   |   |   |   |   |  |  |  |  |  |  |   |
| PIP5KL1      | NM_173492    | 0  | 0  | -1 | 0  |   |  |   |   |   |   |   |  |  |  |  |  |  | X |
| PKD1L2       | NM_052892    | 0  | 1  | -1 | 1  |   |  |   |   |   | X |   |  |  |  |  |  |  |   |
| PLA2G4C      | NM_003706    | -1 | -1 | -1 | 0  |   |  |   |   |   |   |   |  |  |  |  |  |  | X |
| PLEKHH3      | NM_024927    | -1 | -1 | -1 | 1  |   |  |   |   |   |   |   |  |  |  |  |  |  | X |
| PNPLA6       | NM_006702    | 0  | -1 | -1 | 0  |   |  |   |   |   |   |   |  |  |  |  |  |  | X |
| POMZP3       | NM_152992    | -1 | 0  | -1 | 1  |   |  |   | X |   |   |   |  |  |  |  |  |  |   |
| PPAP2C       | NM_177543    | 0  | 0  | -1 | 0  |   |  |   |   |   |   |   |  |  |  |  |  |  | X |
| PPM1M        | NM_144641    | -1 | 0  | -1 | -1 |   |  |   |   |   |   | X |  |  |  |  |  |  |   |
| PPM2C        | NM_018444    | 1  | 0  | 0  | -1 |   |  |   |   | X |   |   |  |  |  |  |  |  |   |
| PPP1R13L     | NM_006663    | -1 | 0  | -1 | 0  | X |  |   |   |   |   |   |  |  |  |  |  |  |   |
| PPP1R9B      | NM_032595    | -1 | 0  | -1 | 0  |   |  |   |   |   |   |   |  |  |  |  |  |  | X |
| PRKAR1B      | NM_002735    | 0  | -1 | -1 | -1 |   |  |   |   |   |   |   |  |  |  |  |  |  | X |
| PRR15        | NM_175887    | 1  | -1 | 0  | 0  |   |  |   |   |   |   |   |  |  |  |  |  |  | X |
| PSMB8        | NM_004159    | 1  | -1 | -1 | 0  |   |  |   |   |   |   | X |  |  |  |  |  |  |   |
| PSME1        | NM_006263    | 0  | 0  | -1 | -1 |   |  |   |   |   |   |   |  |  |  |  |  |  | X |
| PTGES        | NM_004878    | -1 | 0  | -1 | -1 |   |  |   |   |   |   |   |  |  |  |  |  |  | X |
| PTK6         | NM_005975    | 1  | 0  | -1 | -1 | X |  |   |   |   |   |   |  |  |  |  |  |  |   |
| PTOV1        | NM_017432    | -1 | 0  | -1 | 1  |   |  |   |   |   |   |   |  |  |  |  |  |  | X |
| PYDC1        | NM_152901    | 1  | -1 | 0  | 1  |   |  |   | X |   |   |   |  |  |  |  |  |  |   |
| RAB1B        | NM_030981    | 0  | -1 | -1 | 1  |   |  |   |   |   |   |   |  |  |  |  |  |  | X |
| RAC3         | NM_005052    | -1 | 0  | -1 | 0  |   |  |   |   |   |   |   |  |  |  |  |  |  | X |
| RAMP1        | NM_005855    | 0  | -1 | 0  | 1  |   |  |   | X |   |   |   |  |  |  |  |  |  |   |
| RANBP5       | NM_002271    | 0  | -1 | -1 | 0  |   |  |   |   |   |   | X |  |  |  |  |  |  |   |
| RANGAP1      | NM_002883    | 0  | 1  | -1 | 1  |   |  |   |   |   |   |   |  |  |  |  |  |  | X |
| RARRES3      | NM_004585    | 0  | -1 | -1 | 0  |   |  |   |   |   |   | X |  |  |  |  |  |  |   |
| RBM35B       | NM_024939    | 0  | -1 | -1 | 0  |   |  |   |   |   | X |   |  |  |  |  |  |  |   |
| RBM9         | NM_014309    | -1 | 0  | -1 | 0  |   |  |   |   |   | X |   |  |  |  |  |  |  |   |
| RCCD1        | NM_033544    | 0  | 0  | -1 | 0  |   |  |   |   |   |   | X |  |  |  |  |  |  |   |
| RELB         | NM_006509    | 1  | 1  | -1 | 0  |   |  |   | X |   |   |   |  |  |  |  |  |  |   |
| RG9MTD2      | NM_152292    | -1 | -1 | 1  | 0  |   |  |   |   | X |   |   |  |  |  |  |  |  |   |
| RGNEF        | NM_001080479 | 1  | -1 | 0  | 0  |   |  |   |   |   | X |   |  |  |  |  |  |  |   |
| RHBDD3       | NM_012265    | -1 | 0  | -1 | 1  |   |  |   |   |   |   |   |  |  |  |  |  |  | X |
| RHOD         | NM_014578    | 0  | 0  | -1 | 0  |   |  |   |   |   |   | X |  |  |  |  |  |  |   |
| RNF187       | BC012758     | -1 | -1 | -1 | -1 |   |  |   |   |   |   |   |  |  |  |  |  |  | X |
| RNF208       | NM_031297    | 0  | -1 | -1 | 0  |   |  |   |   |   |   | X |  |  |  |  |  |  |   |
| RNF215       | NM_001017981 | -1 | 0  | -1 | -1 |   |  | X |   |   |   |   |  |  |  |  |  |  |   |
| RNF5         | NM_006913    | -1 | 0  | -1 | -1 |   |  |   | X |   |   |   |  |  |  |  |  |  |   |
| ROBO3        | NM_022370    | -1 | 0  | -1 | -1 |   |  | X |   |   |   |   |  |  |  |  |  |  |   |
| RP11-151A6.2 | BC001077     | -1 | 0  | 0  | -1 |   |  |   |   | X |   |   |  |  |  |  |  |  |   |
| RPRML        | NM_203400    | 1  | 1  | -1 | 1  |   |  |   |   |   |   |   |  |  |  |  |  |  | X |
| S100A11      | NM_005620    | 0  | -1 | 0  | -1 |   |  |   |   |   |   |   |  |  |  |  |  |  | X |
| SEMA3F       | NM_004186    | 0  | -1 | 1  | 0  |   |  |   |   |   |   | X |  |  |  |  |  |  |   |
| SEPP1        | NM_005410    | -1 | 0  | 1  | 1  |   |  |   |   |   |   | X |  |  |  |  |  |  |   |
| SERPINA3     | NM_001085    | 1  | 1  | -1 | 0  | X |  |   |   |   |   |   |  |  |  |  |  |  |   |
| SFRS15       | NM_020706    | 0  | 0  | -1 | 0  |   |  |   |   | X |   |   |  |  |  |  |  |  |   |
| SLC16A4      | NM_004696    | -1 | 0  | 1  | 1  |   |  |   |   |   |   |   |  |  |  |  |  |  | X |
| SLC2A4RG     | NM_020062    | -1 | -1 | -1 | 1  |   |  |   |   |   |   |   |  |  |  |  |  |  | X |
| SLC2A4RG     | NM_020062    | -1 | -1 | -1 | 1  |   |  |   |   |   |   |   |  |  |  |  |  |  | X |
| SLC5A6       | NM_021095    | 0  | 0  | -1 | 0  |   |  |   |   |   |   | X |  |  |  |  |  |  |   |
